# Supplementary material for: Ensemble learning enhances the precision of preliminary detection of primary hepatocellular carcinoma based on serological and demographic indices
Source: Front Oncol. 2024 Jun 17;14:1397505. doi: 10.3389/fonc.2024.1397505 (PMC11215019; doi:10.3389/fonc.2024.1397505)
Supplement: Supplementary file 1 [file Table_1.xls]

## Sheet: PHC
	Sex	Age	Weight(Kg)	Height(cm)	BMI	AFP	WBC	Hb	PLT	ALB	GLu	TBIL	ALT	ALP
number1	Male	70	67	170	23.1834	3.66	2.08	121	70	36	4.34	13.4	21.5	171
number2	Male	37	85	170	29.4118	70.47	6.54	156	58	35.3	7.91	18	40.1	90
number3	Female	69	5.5	155	2.28928	3828	4.23	124	194	32.4	4.62	28.9	43.2	94
number4	Female	66	60	160	23.4375	25.96	7.58	117	175	32.7	6.79	16.6	94.5	101
number5	Male	59	72	180	22.2222	6.79	5.3	134	95	35.8	4.64	31.9	41.6	65
number6	Male	69	55.7	160	21.7578	46610.1	5.78	129	99	36.7	5.11	24	297.4	385
number7	Male	79	56	170	19.3772	12102	3.26	120	50	35.1	4.58	41.8	32.8	61
number8	Male	60	77	170	26.6436	298.11	8.01	133	177	40	21	26.5	93	160
number9	Male	48	74	174	24.4418	66.47	11.31	139	256	36.1	4.01	12	81.8	135
number10	Male	79	72.5	174	23.9464	30.93	13.4	128	101	34.1	5.51	27.1	29.7	73
number11	Male	65	80	165	29.3848	3.79	2.8	129	66	33.1	10.61	28.8	55	112
number12	Male	47	75	176	24.2123	4228.1	7.6	172	143	47.2	5.26	33.8	155.4	115
number13	Male	72	68	170	23.5294	3931.49	3	124	136	33	4.43	44.4	217.7	112
number14	Male	79	51.5	153	22.0001	420.18	3.54	139	74	34.8	4.5	13	102.8	92
number15	Male	47	65	163	24.4646	102.37	5.77	152	146	36.9	10.07	28.7	471	125
number16	Male	59	61.5	162	23.4339	52350	9.2	112	265	27.8	3.39	27	44.4	154
number17	Male	57	70	170	24.2215	85.88	5.21	160	214	40.7	4.63	20	32.8	84
number18	Female	53	58	150	25.7778	54000	3.9	146	140	33.2	3.6	36	118.8	171
number19	Male	81	62	175	20.2449	4	4.33	108	111	33.1	4.17	30.1	517.7	159
number20	Male	43	72	167	25.8166	7.52	9.51	109	126	35.5	5.94	16.7	108	72
number21	Male	53	80	170	27.6817	4148.32	3.07	136	62	29.9	3.99	28.2	38.2	106
number22	Male	69	67.5	165	24.7934	2.96	12	129	197	33.8	6.44	16.9	98	147
number23	Male	72	72	173	24.0569	97.79	11.64	133	106	36.8	4.82	37.1	102	60
number24	Male	78	59	170	20.4152	1.65	7.12	92	362	12	4.29	25.4	114.1	84
number25	Male	60	55	160	21.4844	2.83	3.85	117	147	42.8	5.04	20	30.9	95
number26	Male	52	69	170	23.8754	11.55	4.09	154	100	35.1	4.62	25.8	196.3	105
number27	Male	59	72	169	25.2092	7.87	6.25	113	85	37.8	4.95	20.3	51.4	79
number28	Female	64	50.5	155	21.0198	6.06	3.6	104	97	31.3	4.71	15.1	127.1	132
number29	Male	56	65	175	21.2245	5.1	7.19	145	219	41.1	4.14	17	41.1	68
number30	Male	50	93	162	35.4367	28751.7	6.77	163	167	42.4	5.55	22	594	111
number31	Male	79	50	170	17.301	13.84	4.17	102	136	37.2	5.43	18.6	48	139
number32	Male	70	60	162	22.8624	4.34	6.62	158	224	42	4.92	24.5	10.5	77
number33	Male	65	74	170	25.6055	5.32	3.9	161	219	41.7	7.76	14.7	26	70
number34	Female	67	49	150	21.7778	7.5	3.7	119	143	35.7	4.66	26.4	38.2	169
number35	Female	71	54	150	24	19.52	2.69	123	83	29.7	4.22	45.3	161	89
number36	Male	32	65	168	23.03	34.12	6.89	152	187	33.9	4.27	66.6	256.7	79
number37	Male	59	52.5	163	19.7599	1.7	4.17	127	177	37.9	4.44	8	211	136
number38	Male	53	67	168	23.7387	1.87	7.28	127	285	34.8	5.03	42.4	69.2	151.1
number39	Male	58	64	170	22.1453	2.84	2.84	106	53	41.2	7.35	31.1	290	84
number40	Male	70	62.5	164	23.2377	2.23	5.98	118	234	28	15.97	19.9	116	573
number41	Male	55	63	174	20.8086	71.13	5.16	146	162	40.4	5.14	25.6	181.6	86
number42	Male	74	55	166	19.9594	3548.72	4.48	152	200	39.8	4.57	27	68.2	60
number43	Male	63	51.9	164.5	19.1794	3.64	7.62	166	207	36.6	5.07	23.9	58.4	114
number44	Male	75	60	170	20.7612	4.1	7.11	119	138	39.3	4.61	22.5	107.4	72
number45	Female	68	51	158	20.4294	42.53	5.92	105	78	39	6.35	26.5	145.5	72
number46	Male	51	60	168	21.2585	1116	4.4	147	186	39.5	4.17	38.3	481	61
number47	Male	59	65	167	23.3067	10.61	4.55	159	176	44	4.99	25.6	129	116
number48	Male	60	67.5	163	25.4055	19978	3.42	151	88	43.1	5.61	20.8	704.9	219
number49	Male	55	54	167.5	19.247	15014.5	3.23	139	135	38.1	4.3	38.1	908.6	78
number50	Male	50	73	160	28.5156	236.55	5.55	141	254	39.8	7.5	24.2	332	228
number51	Male	55	68	165	24.977	42.26	6.8	142	35	38.4	5.31	29	60.3	98
number52	Male	65	65	155	27.0552	16.5	4.38	148	86	38.4	5.04	11.4	74.5	123
number53	Male	64	67.5	178	21.3041	1272.09	3.18	135	58	39.6	4.3	30.8	59.9	74
number54	Male	48	53	168	18.7783	36648.9	8.04	166	128	40.6	4.93	29.1	124.3	114
number55	Male	64	69	165	25.3444	184.21	5.42	109	188	38.4	5.33	17	136.3	202
number56	Female	52	90.5	155	37.6691	38.35	7.99	147	232	37.2	4.53	12	558	52
number57	Male	63	52	160	20.3125	6.74	3.86	141	180	44.9	7.61	29.3	135	59
number58	Male	72	42	158	16.8242	6.3	5.92	123	222	36.1	4.21	25.2	146	55
number59	Male	53	76	174	25.1024	696.86	6.25	154	126	43	4.27	36.7	544.2	101
number60	Male	45	81	168	28.699	241.25	5.5	154	229	36.1	5.06	17.7	51.5	83
number61	Male	57	32	170	11.0727	9675.28	6.42	146	191	38.9	4.72	29	334.5	117
number62	Male	66	60	170	20.7612	38.82	4.22	143	128	43.2	5.11	18.8	32.9	122
number63	Female	71	65	160	25.3906	23.3	4.72	128	115	33.8	4.3	33.4	250.1	81
number64	Male	56	61	163	22.9591	4.27	6	144	156	29.3	6.15	16.9	56	91
number65	Male	47	75.5	172	25.5206	4.75	6.01	154	218	45.2	12.7	25.2	70.6	88
number66	Male	66	61	160	23.8281	7.52	9.21	122	147	35.9	5.06	6.8	82.9	126
number67	Female	67	60	160	23.4375	6.72	5.95	144	79	41.4	5.71	27.9	237.8	123
number68	Female	72	35	150	15.5556	9050.36	4.32	128	126	31.8	4.27	11.9	70.6	129
number69	Male	52	72	163	27.0993	71.18	3.39	156	78	36.1	6.57	25.6	52.7	114
number70	Male	60	73	170	25.2595	3.01	4.63	160	127	38.2	4.15	18.5	192	64
number71	Male	70	60.2	167	21.5856	3.75	3.16	131	39	33	4.48	14.3	278	100
number72	Male	68	50	165	18.3655	13.9	6.56	151	196	43	6.36	24.7	332	116
number73	Male	73	66	175	21.551	4.66	9.65	131	206	40.2	4.75	19	133.9	162
number74	Female	66	46	155	19.1467	155.3	2.34	124	45	39.5	5.02	16.2	71.1	146
number75	Female	32	42.5	154	17.9204	1551.29	4.07	123	192	38.5	4.3	27.7	129.5	138
number76	Male	63	57	165	20.9366	36.19	3.65	155	136	37	4.89	22	105.5	71
number77	Male	63	65	165	23.8751	7.54	3.64	139	93	35.1	5.18	29.8	62.6	95
number78	Male	50	43	170	14.8789	346.83	4.89	117	183	31.2	4.47	53.4	313.9	92
number79	Male	74	60	160	23.4375	92.05	4.41	148	175	37.8	3.93	20	113.8	39
number80	Male	70	60	168	21.2585	5.03	3.14	127	51	32.9	4.88	39.4	32.1	140
number81	Male	41	110	165	40.404	3.45	8.39	166	247	39.3	5.17	8.1	136	83
number82	Male	79	61.5	172	20.7883	7.39	6.18	105	167	38.4	4.83	17.5	22.2	76
number83	Male	74	52	158	20.83	5.36	5.3	130	269	33.6	4.23	14.6	15	110
number84	Male	60	61	175	19.9184	14674.9	4.69	157	106	47.9	5.99	30.9	209	75
number85	Male	47	70	170	24.2215	260.2	6.39	171	206	38.5	5.37	15.4	56.1	136
number86	Male	68	62.5	173	20.8828	3.11	4.82	136	181	38.4	4.32	23.6	23.8	129
number87	Female	77	62	158	24.8358	3.23	12	143	105	18.1	7.24	22.6	212	83
number88	Male	53	77	176	24.858	172.99	3.34	156	129	41.3	6.08	22.3	38.3	90
number89	Male	54	60	168	21.2585	37.45	4.56	145	89	43.8	5.03	19.6	26.1	56
number90	Male	57	54	163	20.3244	165.7	5.99	127	293	35.3	5.43	12.7	99.8	91
number91	Male	65	68	165	24.977	308.91	3.91	144	177	35	4.7	17.2	20.1	104
number92	Male	43	60	167	21.5139	319.97	6.38	182	108	45.4	5.92	33.2	46	93
number93	Male	31	57.5	170	19.8962	3.29	5.73	156	132	42.3	3.86	22.1	66.7	124
number94	Male	61	75	160	29.2969	5821.32	7.56	146	172	41.3	4.83	14.6	24.4	132
number95	Male	62	55	170	19.0311	6.86	8.17	97	141	33.4	16.01	15.4	23.3	62
number96	Male	56	65	160	25.3906	3938.55	11.5	153	95	33.9	6.74	32.6	84.1	67
number97	Male	64	72	172	24.3375	4.76	9.47	162	257	42.9	6.42	28.5	13.3	105
number98	Male	48	62.5	165	22.9568	15.45	3.17	117	38	24.1	3.82	45.5	45.3	102
number99	Male	64	65	165	23.8751	1.7	6.6	150	259	31.5	5.83	18.8	213	69
number100	Male	58	65	179	20.2865	4.83	5.24	133	148	40.2	4.62	13.2	78.8	104.4
number101	Male	49	75	175	24.4898	2838.39	2.91	159	81	29.3	4.06	21.9	20.7	111
number102	Male	66	55	165	20.202	2.61	5.37	107	57	33.5	5.56	19	153	173
number103	Male	63	64	170	22.1453	96.64	6.69	151	171	39.1	6.17	28.5	193.7	182
number104	Male	58	66	170	22.8374	1153	5.33	152	103	35.4	5.29	25.9	338	135
number105	Male	66	55	166	19.9594	9.72	6.02	150	154	34.1	8.3	11.3	95	108
number106	Male	53	78	167	27.968	4.93	8.33	115	141	30.4	5.79	36.3	65	78
number107	Male	87	62	160	24.2187	2.26	13.16	93	125	31.8	3.86	17.9	231.9	126
number108	Male	62	72	160	28.125	8.92	5.28	154	199	39.9	5.98	14.4	491.2	273
number109	Male	33	71	171	24.281	202.88	6.09	156	207	45.3	4.22	10.2	32	128
number110	Female	74	45	160	17.5781	149.28	4.66	120	150	43.9	4.69	12.2	32.3	112
number111	Male	36	68.5	170	23.7024	2412.84	8.06	151	242	44.4	8.35	23.8	169	126
number112	Male	37	63	170	21.7993	260.57	3.02	100	86	41.5	6.01	47.4	19.4	91
number113	Male	64	62.5	170	21.6263	5.38	5.72	153	66	39.6	5.08	36.5	410.3	81
number114	Male	51	64	170	22.1453	5.71	6.57	113	177	32.6	4.56	30.5	69.7	37
number115	Male	54	60	159	23.7332	5.18	7.27	126	282	32.8	6.23	9.9	21.6	66
number116	Male	38	53	170	18.3391	4.65	5.07	145	173	40.3	4.66	14.3	28.1	127
number117	Male	61	78	172	26.3656	3.29	6.84	147	118	39.2	4.91	16.6	129.8	87
number118	Male	44	70	173	23.3887	1.79	5.45	142	192	36.5	4.71	11.1	35.4	57
number119	Female	55	48	160	18.75	9.89	8.66	137	282	32	4.58	13.4	119.9	97
number120	Male	58	55	167	19.721	5.5	5.33	152	107	49.6	4.97	27	114	82
number121	Male	51	64	164	23.7954	243.15	4.41	152	240	33.1	4.45	22.2	184.4	71
number122	Male	48	56	160	21.875	4.76	6.26	172	125	36	15.13	18.1	396.7	114
number123	Male	44	67	175	21.8776	3.07	9.59	150	259	35	4.76	14.6	100.3	53
number124	Male	56	80	160	31.25	3.87	3	120	97	36.6	4.69	12.8	23	212
number125	Male	73	62	168	21.9671	7.37	3.21	136	124	35	6.4	12.6	15.1	89
number126	Male	70	64	167	22.9481	2.39	7.64	153	191	43.2	4.98	13.9	35.8	94
number127	Male	68	68	168	24.093	15.55	3.67	143	91	36.4	4.65	20.4	355	99
number128	Male	49	65	180	20.0617	1.89	3.77	152	143	39.8	5.47	15.5	68.4	94
number129	Male	57	62	175	20.2449	65.2	4.78	137	111	38.9	5.72	31.2	194.7	128
number130	Male	47	77	171	26.3329	54000	6.16	167	141	42.8	5.13	24	116.7	168
number131	Male	71	63	168	22.3214	3.56	3.36	95	56	22.5	4.82	20.6	16.4	56
number132	Male	63	61	170	21.1073	3.08	3.75	144	75	36.9	10.18	17.7	133.9	115
number133	Female	65	45	155	18.7305	5.92	3.95	133	122	32.2	4.58	11.3	64.1	69
number134	Male	74	53	165	19.4674	3785.97	4.31	111	77	35.4	4.99	18.2	37.4	85
number135	Male	54	64	175	20.898	7.45	3.02	123	73	34.1	8.08	26.6	121	80
number136	Male	58	54	162	20.5761	16.44	3.37	115	60	20.4	4.31	35.9	53.4	101
number137	Male	55	70	167	25.0995	107.64	7.16	119	81	27.5	4.17	41.8	26.4	122
number138	Male	61	70	170	24.2215	3.09	5.45	149	131	46.3	5.5	20.7	24.2	56
number139	Male	56	68.3	158	27.3594	331.31	3.28	116	156	28.1	7.53	15	38.7	70
number140	Male	67	55	160	21.4844	40333.7	4.93	146	197	36.2	5.14	7	194.9	162
number141	Male	67	60	165	22.0386	3.99	2.84	95	67	40.9	4.78	23.4	13.7	158
number142	Male	76	53	173	17.7086	6.75	11.6	105	103	43.3	4.67	22.7	127	127
number143	Male	46	57	173	19.0451	11.84	5.12	134	64	43.6	6.51	19.2	69.4	92
number144	Male	65	52	170	17.9931	1.7	3.6	101	107	41.5	4.64	13.6	16.2	61
number145	Male	62	53	170	18.3391	2.02	9.7	122	275	44.9	2.96	6.7	29.2	91
number146	Male	56	56	174	18.4965	5	11.9	105	203	31.3	5.01	13	25	91
number147	Female	29	50	163	18.8189	2.11	5.6	121	228	45.1	4.59	10.2	113	58
number148	Female	30	50	163	18.8189	1.82	3.8	137	157	46.1	4.92	40.9	13.6	141
number149	Female	35	50	160	19.5312	20.25	4.63	168	101	49.7	4.97	8.8	18	56
number150	Male	50	51	160	19.9219	2.43	3.33	124	165	33.9	5.45	21.8	17	122
number151	Male	61	78.5	170	27.1626	13.88	6.1	132	167	40.1	6.29	22.4	91.3	144
number152	Female	63	51	158	20.4294	1.7	7.2	133	395	42.5	4.53	9.8	33	186
number153	Female	46	53	160	20.7031	2.69	5.99	124	213	46.3	5.07	10.8	12.9	55
number154	Male	56	73	175	23.8367	2.34	3.8	121	137	36.1	4.99	126.8	488.7	469
number155	Female	52	58	165	21.3039	2.74	3.6	129	153	43	4.88	13.6	212.3	84
number156	Female	40	52.5	156	21.573	3.14	5	105	364	36	5.3	3.1	42.1	92
number157	Male	61	62	168	21.9671	4.15	5	164	168	51.1	5.85	27.2	70	85
number158	Male	84	70	178	22.0932	1.7	7.3	123	157	47.5	8.06	15.5	70.2	207
number159	Male	64	80	170	27.6817	2.31	4.4	147	95	42.4	6.02	10.1	61	67
number160	Female	74	55	152	23.8054	6.34	3.8	106	293	32.5	5.94	15.8	127.8	152
number161	Male	67	52	165	19.1001	3.7	5.8	131	198	39.5	4.13	26.2	244	160
number162	Male	51	58	160	22.6562	3.82	6.2	146	179	40.8	5.51	11.9	129.6	87
number163	Male	68	58	160	22.6562	1.7	7.63	118	174	40	6.58	12.2	253.5	1259
number164	Female	48	58	160	22.6562	4.96	4.9	127	234	38.9	4.29	9.3	119	72
number165	Female	57	51	150	22.6667	1.7	3.03	98	97	43.7	4.7	13.9	18.3	139
number166	Female	62	62	156	25.4767	3.23	4.35	138	268	41.1	7.34	14.2	27	119
number167	Female	46	61	162	23.2434	2.96	5.4	137	206	46.5	5.19	18.9	63	56
number168	Female	56	57	156	23.4221	1.7	9.6	124	521	34.5	4.44	9.3	41	172
number169	Male	70	56	163	21.0772	4.03	3.93	127	142	42.1	4.49	25.1	28.8	129
number170	Male	63	53	170	18.3391	2.62	5	136	215	43.7	5.22	9.6	143.9	93
number171	Female	34	57	155	23.7253	2.32	5.9	139	288	46.4	5.02	17.6	5.6	54
number172	Male	75	49	160	19.1406	2.17	9.72	127	207	38.2	4.54	10.2	177.6	55
number173	Male	60	65	165	23.8751	1.7	6.5	137	205	38.1	6.36	9.9	59.2	93
number174	Male	61	65	168	23.03	27.96	4.9	137	168	37.8	4.85	13.8	75.7	98
number175	Male	83	60	171	20.5191	3.27	7.24	98	43	35.1	5.76	61.3	261.4	84
number176	Male	70	73	172	24.6755	8.53	8	143	256	47.3	4.77	16.4	154.9	123
number177	Male	64	72	170	24.9135	53.05	3.66	128	134	42.3	6.4	29.3	112	162
number178	Male	56	68	167	24.3824	260.85	6.3	162	122	41.9	5.19	12.4	22	113
number179	Female	56	67.5	165	24.7934	11.3	7.9	127	205	40.6	5.19	13.6	53	74
number180	Male	67	65	170	22.4913	13.93	3.4	146	92	36	4.69	20.9	68.1	87
number181	Male	38	75	173	25.0593	3.32	5.2	147	221	51.6	5.03	14.4	59.1	100
number182	Female	60	47	159	18.591	2.12	9.5	103	235	46.8	4.61	8.5	219	75
number183	Male	67	62.5	172	21.1263	6.13	4.5	154	65	43.8	4.92	10.7	11.6	63
number184	Male	70	54.5	160	21.2891	25.73	98	162	256	42.0	5.49	11.6	31	131
number185	Male	78	66	163	24.841	5.74	11.1	105	157	38.2	4.89	9.6	2	79
number186	Female	22	66	159	26.1066	1.7	6	130	198	53.7	5.65	12.8	24	75
number187	Female	51	54	142	26.7804	180.0	4.97	117	252	45.4	4.21	14.0	44.5	180
number188	Male	49	74	168	26.2188	3.92	11.9	158	192	44.5	5.04	11.6	79.2	60
number189	Female	30	72	165	26.4463	2.8	5.5	101	153	48.5	4.58	16.9	16	59
number190	Male	53	67	164	24.9108	705.6	9.1	83	50	41	5.19	18	11.3	77
number191	Male	55	68	172	22.9854	150.72	11.6	152	235	44.0	6.67	19.0	17	91
number192	Male	56	55	160	21.4844	29.17	9.1	86	118	31.0	8.28	24.0	207.3	273
number193	Male	64	75	164	27.8852	580.17	6.2	109	93	38.8	7.5	12.8	22.3	87
number194	Male	34	92	178	29.0367	8.33	5.6	174	139	45.1	4.99	17.3	150.1	116
number195	Male	37	81	165	29.7521	1.7	7.2	152	288	47	4.93	13.2	35	68
number196	Female	63	82	165	30.1194	2.29	14	110	213	38.3	14.04	8.4	56.8	87
number197	Male	64	65	165	23.8751	1.7	5.1	103	300	47.3	5.83	18.8	213	67
number198	Male	27	65	178	20.5151	5679.08	6.5	143	257	44.5	5.36	10.4	63.1	99
number199	Male	65	57	165	20.9366	1.81	6	126	221	25.2	4.15	216	178	349
number200	Female	58	55	155	22.8928	1.87	25.05	131	261	31.6	7.01	13.9	55.7	140
number201	Male	45	90	173	30.0712	4.27	11.6	120	170	34	8.01	25.8	53.6	88
number202	Male	44	70	168	24.8016	4.45	5.6	141	104	47.8	5.1	121.1	23.5	85
number203	Male	61	52	158	20.83	2.64	7.1	130	386	40.1	8.84	17.2	89.4	44
number204	Male	64	65	168	23.03	2.23	2.97	122	144	38.6	4.57	10.6	186.1	231
number205	Male	56	70	178	22.0932	25.43	6.7	154	116	45	7.06	23.9	177.4	223
number206	Female	67	50	155	20.8117	3.72	7.84	136	232	36.7	4.37	12.3	46.8	217
number207	Female	47	42	145	19.9762	1.7	4.9	110	196	32.5	4.43	19.7	188.2	101
number208	Male	63	80	172	27.0416	8.31	4.3	138	76	45.2	9.61	29.7	54.8	53
number209	Female	37	60	166	21.7738	2.48	7.8	111	168	47.3	5.04	9.8	15	47
number210	Male	53	90	170	31.1419	7.88	3.4	139	98	44.6	5.31	13	19	106
number211	Female	42	58	150	25.7778	7.6	6.8	134	152	28.9	5.04	201.5	461.8	1934
number212	Male	47	60	163	22.5827	1528.85	4.2	139	91	42.3	4.36	28.6	73.2	113
number213	Male	48	67	170	23.1834	3.64	4.05	163	204	49.3	5.47	27.9	98	69
number214	Female	50	60	158	24.0346	1.2	4.73	138	335	43	4.7	14.8	103.3	101
number215	Male	61	65	158	26.0375	4.41	3	171	107	45.9	5.09	18.8	72.6	71
number216	Male	54	75	173	25.0593	2.11	3.88	164	153	47.9	5.29	21.2	527.2	64
number217	Male	36	75	172	25.3515	2.3	4.39	150	204	42.9	5.16	9.7	404.2	46
number218	Female	66	58.5	151	25.6568	3.11	11.7	118	390	42.3	8.48	12.2	37	120
number219	Male	70	73	159	28.8754	1.92	5.71	137	138	42.9	5.3	13.6	214.5	90
number220	Male	63	74	169	25.9095	3.24	5.21	123	226	41	4.79	13.1	96.6	150
number221	Female	54	63	155	26.2227	0.88	6.22	84	372	33	4.53	7.3	14.9	147
number222	Female	48	78	167	27.968	2.67	5.09	120	145	38.2	5.26	7.9	14.2	14.2
number223	Female	41	75	163	28.2284	1.87	4.24	102	158	36.4	4.37	6.5	29.5	56
number224	Female	62	70	155	29.1363	2.12	9.26	133	313	40.7	9.79	9.4	77.6	62
number225	Male	49	82	165	30.1194	2.32	6.31	167	204	46.3	5.85	25.2	384.4	72
number226	Male	58	85	165	31.2213	6.37	3.46	136	161	37.8	4.67	9.4	28.8	129
number227	Male	45	60	170	20.7612	9.11	12.4	170	236	54.7	5.27	20.5	99	90
number228	Male	69	46	170	15.917	25.74	4.6	147	111	44.6	4.84	23.9	150.9	119
number229	Female	68	43	160	16.7969	2.53	5.15	101	77	41.9	12.24	13	237	114
number230	Male	62	61	157	24.7475	3.29	9.71	143	209	41.2	5.34	15.6	59.4	80
number231	Male	68	69	158	27.6398	10.2	4.1	144	103	31.4	4.91	17.9	61.2	112
number232	Female	54	62	156	25.4767	2.27	4.28	121	203	42.4	5.03	11.1	96.4	68
number233	Male	70	70	160	27.3437	7.28	6.81	146	301	39.6	5.53	13.1	55.6	124
number234	Male	56	47.5	155	19.7711	506.45	4.6	81	156	37.4	4.86	11.0	38	111
number235	Male	72	65	175	21.2245	1.7	4.7	143	107	34.7	5.2	18.7	13	99
number236	Male	47	60	170	20.7612	346.92	4.98	169	165	42.7	5.87	23	23.3	87
number237	Male	55	53	165	19.4674	3	5.1	141	200	41.7	4.8	48	19	60
number238	Male	59	85	172	28.7317	1.7	5	140	235	43.6	6.11	18.5	164	113
number239	Male	81	80	175	26.1224	37.43	3.7	139	135	36.3	4.13	19.3	59.4	116
number240	Female	58	74	170	25.6055	259.2	3.6	135	192	43.5	6.5	21.9	26	130
number241	Male	73	57	168	20.1956	44.98	2.6	137	65	37	4.6	14.1	22	93
number242	Male	65	71	175	23.1837	5.18	5.3	128	191	34.1	4.52	226.1	29	74
number243	Female	54	55	153	23.4952	4844.8	5.4	112	196	42.1	4.31	12.4	36	84
number244	Male	49	81	165	29.7521	312.51	6.1	136	92	35	4.72	9.2	23.8	136
number245	Male	33	56	163	21.0772	3.2	8.1	154	313	44.6	4.86	12.4	24.5	77
number246	Male	70	72	170	24.9135	5.3	2.95	108	115	38.5	6.1	29.7	14	243
number247	Male	48	68	168	24.093	43.11	2.4	86	61	46.1	4.8	26.8	35	143
number248	Female	52	55	160	21.4844	1.7	4.3	128	188	42.9	4.79	29	15.5	58
number249	Male	64	82.5	170	28.5467	314.3	3.3	148	70	39.1	5.4	35.4	14.9	73
number250	Male	71	60	170	20.7612	11.63	3.7	153	187	45.8	5.21	21	95.9	74
number251	Male	59	68	166	24.677	4.4	6.8	144	193	38.5	6.65	15.5	62	322
number252	Male	60	70	172	23.6614	22.55	2.3	144	38	39.4	5.16	19.8	243.6	133
number253	Male	60	72	172	24.3375	92.35	3	145	58	32.2	6.96	39.6	14	90
number254	Male	61	65	165	23.8751	1712.06	5.4	166	203	36.7	5.4	12.0	18	60
number255	Male	63	65	165	23.8751	387.19	5.6	163	143	43.7	4.18	20	73.5	103
number256	Male	47	64	181	19.5354	157.2	6	154	198	44.9	5.83	8.7	136.1	81
number257	Male	42	52.5	172	17.7461	1.7	5.7	135	240	36.3	3.92	8.9	47.2	86
number258	Male	55	68	172	22.9854	2.07	3.8	94	78	38.6	5.19	8.5	90.8	68
number259	Male	63	83	170	28.7197	1.8	7.2	146	127	42.5	11.06	8.9	140	94
number260	Male	60	64	167	22.9481	3.09	4.28	153	131	40.1	7.08	31.9	107.7	94
number261	Male	58	57	169	19.9573	5.72	2.5	121	48	37.4	4.76	25.6	121	54
number262	Female	43	49	158	19.6283	3526.4	4.7	124	210	41.6	4.8	11.2	14.5	73
number263	Male	55	57	165	20.9366	3.12	6.37	139	215	32.4	10.55	18.4	21	87
number264	Male	74	63	163	23.7118	5.73	5.1	160	80	41.9	5.23	24.9	173	135
number265	Male	57	73	175	23.8367	1.7	5.1	148	104	39.0	4.66	19.6	17	79
number266	Male	41	60	167	21.5139	2083.57	6.7	127	165	49.3	4.27	17.6	468	96
number267	Male	65	47.5	163	17.878	4.15	5.3	120	172	33.5	4.69	295.2	72.3	296
number268	Female	50	55	155	22.8928	3.92	7.8	104	324	34.3	4.9	12.6	91	161
number269	Male	55	67	170	23.1834	392.61	3	152	68	39.7	5.64	18	64	94
number270	Male	66	57	160	22.2656	2.99	3.7	134	96	42	5.48	16.3	8.5	112
number271	Female	65	71.5	155	29.7607	1.7	11	112	239	41.3	4.46	8.4	26.7	182
number272	Male	61	67.5	165	24.7934	18.67	4.89	174	172	43.1	2.8	26.1	67.6	77
number273	Female	72	36	160	14.0625	3.13	4.6	110	378	41.5	4.77	8.6	76	209
number274	Male	52	73	168	25.8645	78.5	13.5	150	159	41.9	4.56	26.1	126	59
number275	Male	26	63	180	19.4444	1.7	7.3	151	189	48.7	4.49	10.4	85	70
number276	Female	71	58	158	23.2335	20.35	2.6	125	79	42.3	5.88	9.1	65	109
number277	Male	53	65	161	25.0762	6.46	7.9	144	229	44.5	9.54	15.8	606.4	109
number278	Male	69	59	165	21.6713	2.89	7.8	129	171	42.6	5.43	15	128.3	86
number279	Female	77	52	162	19.8141	1.7	4.7	92	135	37.2	4.64	8.7	132.4	149
number280	Male	79	60	164	22.3081	2.35	5.22	114	151	34.6	7.03	7.7	18.6	232
number281	Female	62	50	155	20.8117	1.7	2.8	127	216	47.5	5.35	13.8	88	129
number282	Male	38	53	165	19.4674	20000	6.9	154	220	43.8	4.11	15	234	98
number283	Female	51	52	156	21.3675	4.75	3.7	134	68	49.0	7.04	13.2	136.9	83
number284	Male	65	46	163	17.3134	39.15	3	156	54	40.4	3.48	16.9	90.5	73
number285	Male	65	63.5	160	24.8047	3.17	9.2	167	185	39.2	10.04	15.6	380.6	123
number286	Male	47	75	168	26.5731	117.95	5.8	150	152	37.1	6.28	25.5	7	76
number287	Male	59	72	170	24.9135	194.59	5.8	146	65	42.5	5.01	17.9	151	126
number288	Male	58	60	175	19.5918	22.28	5.85	114	89	44.1	6.51	16.6	234.6	52
number289	Male	56	61	163	22.9591	4.27	6	144	156	47.5	6.15	16.9	56	91
number290	Male	49	70	175	22.8571	2838.39	3.96	135	105	38	5.09	21.9	100.6	111
number291	Male	47	64	170	22.1453	8.31	4.4	131	131	32.4	4.55	17.5	81	141
number292	Male	68	52	170	17.9931	2.05	4.5	142	98	41.5	4.82	15.2	66.7	54
number293	Male	69	45	160	17.5781	1.7	5.82	120	331	29.5	9.18	5.6	68.7	122
number294	Male	58	44	160	17.1875	1889.38	4.8	115	131	44.5	5	19.7	134.2	82
number295	Male	62	68	165	24.977	308.91	3.91	144	177	35	4.7	17.2	26	104
number296	Male	77	82.5	176	26.6335	14.6	4.4	134	179	41.9	4.95	17.6	214	71
number297	Male	70	74	170	25.6055	1050.07	3.61	174	96	36.5	8.66	29.1	220.8	84
number298	Male	50	50	170	17.301	42.39	5.2	167	125	55.9	5.23	20.5	199.2	104
number299	Male	62	60	175	19.5918	1.47	6.05	148	191	45.3	9.03	22.3	201.3	44
number300	Male	72	58	170	20.0692	10.02	6.92	135	232	34.0	6.64	160.5	88.9	109
number301	Male	37	67.5	173	22.5534	3.19	6.65	135	206	37.6	4.99	11.1	158.3	133
number302	Male	71	69	171	23.597	3.5	5.6	169	176	36.9	7.33	14.3	29.7	401
number303	Female	47	64	165	23.5078	1.7	5.5	126	208	38	4.54	19.1	48	268
number304	Male	56	67	165	24.6097	3635.85	6.11	125	39	41.4	5.51	22.3	185.2	103
number305	Male	68	68	160	26.5625	1.7	5.3	149	151	42.1	5.27	12.6	33.8	67
number306	Male	53	73.5	170	25.4325	219.87	5.1	151	297	39.8	4.44	14.2	18.1	123
number307	Female	69	47	158	18.8271	1.7	3.9	127	210	32.2	8.14	22.2	12	337
number308	Male	67	50	168	17.7154	6.92	7.75	149	88	35.5	6.47	18.5	95.1	86
number309	Female	66	44	158	17.6254	1.7	5.2	113	149	41.3	4.34	19.5	66	68
number310	Female	72	65	160	25.3906	3.21	9.39	113	115	46.6	10.01	15.9	25.2	98
number311	Male	61	75	170	25.9516	3.89	11.15	149	180	36.4	4.31	23.1	100.3	112
number312	Male	62	60	165	22.0386	13	5.2	125	111	39.6	4.33	24.1	28	200
number313	Male	75	61	170	21.1073	3.1	10.4	132	337	33.6	5.08	17.2	88.4	92
number314	Male	48	47	160	18.3594	323.25	4.6	146	232	48.2	5.69	14.7	252.4	83
number315	Male	58	50	170	17.301	5240.6	4.43	121	80	35.3	19.26	31.4	169	224
number316	Female	50	40	150	17.7778	1.7	5.7	136	320	42.5	5.01	10.9	82.8	83
number317	Male	59	59	163	22.2063	12.04	6.2	159	156	38.8	4.84	22.4	1704.4	102
number318	Male	47	80	170	27.6817	4.48	6.83	137	116	39	5.3	12.3	100.1	58
number319	Female	60	57	154	24.0344	2.31	5.1	139	255	49.3	4.91	10.3	127	120
number320	Male	61	60	170	20.7612	20.82	4.6	143	104	39.5	4.85	20.9	10	75
number321	Male	61	80	170	27.6817	1.7	6	120	91	29.8	17.48	79	58	295
number322	Male	65	58	165	21.3039	2.42	4.25	128	210	41.9	7.3	9.8	13.7	88
number323	Male	51	87	180	26.8519	1.7	11.6	150	261	38.2	4.99	10.7	110	112
number324	Female	76	35	150	15.5556	2.42	3.6	106	177	42.5	6.51	18.5	138	141
number325	Male	67	63	170	21.7993	3.18	5.7	114	129	28.6	4.35	11.1	79.7	117
number326	Male	51	60	165	22.0386	8.88	6.5	132	62	37.8	4.26	15.1	54	98
number327	Male	59	61	166	22.1367	16.35	4.18	128	32	36.7	10.48	16.8	78.6	132
number328	Male	65	75	167	26.8923	1.7	4.1	139	166	39.8	5.14	14.6	24.8	130
number329	Male	70	50	165	18.3655	2.76	5.69	96	73	37.6	4.56	31.7	72.4	125
number330	Male	70	70	165	25.7117	479.94	4.2	135	112	47.4	5.5	21.9	50	87
number331	Male	71	63	165	23.1405	1.7	8.9	130	329	38.9	5.78	269.4	87	418
number332	Male	58	67	169	23.4586	115.09	4.6	156	125	37.9	5.53	30.2	20.8	99
number333	Male	53	52	162	19.8141	3.31	4.1	144	150	43.7	5.18	10.4	69.7	83
number334	Male	55	63	170	21.7993	1388.81	3.9	145	158	39.1	4.6	24.5	276.8	81
number335	Female	57	54	156	22.1893	1.7	3	124	122	43.7	4.34	26.1	125	112
number336	Male	75	49	172	16.563	20000	3.5	115	118	37.8	3.85	11.1	52.7	135
number337	Male	63	80	75	142.222	5.15	7.84	184	275	42.0	7.21	15.0	121.3	83
number338	Male	43	70	166	25.4028	3.32	5.59	131	235	36.9	3.57	17.8	529.3	201
number339	Male	60	69	170	23.8754	75.8	5.31	98	176	49.3	6.92	20.6	63.2	96
number340	Male	69	52	158	20.83	5.36	5.3	130	269	30.5	4.23	15.2	7.7	110
number341	Female	74	45	160	17.5781	47.04	3.85	115	200	46.7	5.59	18.5	17.6	62
number342	Female	56	69	158	27.6398	1.7	2.5	126	133	41.1	4.86	43	193.6	69
number343	Male	61	60	170	20.7612	123.9	4.2	134	85	39.5	4.89	16.5	67	149
number344	Female	37	47	162	17.9089	2.13	13.12	138	342	38.0	4.46	9.5	154.3	90
number345	Female	63	54.5	167	19.5418	2.47	4.51	143	265	45.7	10.87	17.7	214.3	285
number346	Female	65	50	158	20.0288	1.7	7.3	107	90	42.6	5.53	19.6	218.1	105
number347	Female	48	51	158	20.4294	2.44	2.5	112	116	44.4	5.99	22.2	45.2	78
number348	Female	70	50	155	20.8117	2.43	4	122	204	40.4	5.46	35.6	659.5	217
number349	Male	67	70	172	23.6614	3.79	4.3	155	164	33.9	6.82	10.7	216.8	66
number350	Female	61	54	160	21.0937	1.91	4.65	139	212	41.9	5.06	11.9	118.1	66
number351	Male	57	61	170	21.1073	1.7	5.8	136	259	36.3	4.68	10.7	165.7	70
number352	Male	57	60	168	21.2585	3.22	2.8	142	109	48.6	7.89	16.2	63.8	64
number353	Male	63	65	174	21.4692	1.7	2.1	128	205	39.3	5.13	13.9	126	59
number354	Female	53	58	163	21.83	2.76	5.8	151	243	50.2	6.14	18.9	16.3	150
number355	Male	65	65	172	21.9713	6.48	4.5	150	271	45.5	4.89	15.9	67	53
number356	Male	57	66	170	22.8374	2.51	3.7	137	101	39.9	5.85	53.7	74.5	70
number357	Male	77	65	170	22.4913	3.26	4.5	168	154	42.6	7.71	23.9	64	81
number358	Female	62	54	155	22.4766	3.33	5	124	136	44.5	4.51	28.8	135	456
number359	Male	79	60	162	22.8624	1.7	10.5	125	81	31.3	5.6	31.2	60.4	341
number360	Female	54	50.5	148	23.0551	1.7	9.88	127	209	31.4	4.07	14.5	10.6	81
number361	Female	45	60	160	23.4375	1.45	6.24	126	201	43.4	4.6	8.3	73.9	156
number362	Male	73	50	160	19.5312	1.7	4.3	118	137	25.6	8	33.3	25	147
number363	Female	61	55	151	24.1217	1.7	2.4	92	130	38.1	4.35	18.8	169.3	109
number364	Male	73	66	165	24.2424	9.06	3.95	130	113	39.3	5.24	13.2	19.2	85
number365	Female	61	63	159	24.9199	1.7	5	128	347	44.1	5.65	11.7	14.8	39
number366	Male	62	68	165	24.977	1.7	2.3	126	92	37.1	3.57	12.1	62.3	34
number367	Male	68	69	168	24.4473	2.62	6.7	102	195	29.7	4.37	46.8	52.9	197
number368	Male	66	42	164	15.6157	3.14	2.4	142	75	38.6	5.76	11.4	94.4	101
number369	Female	57	68	160	26.5625	1.87	4.2	113	176	40.5	4.66	47.8	29	98
number370	Male	52	80	170	27.6817	2.13	10.78	145	206	35.0	8.29	17.1	58.6	116
number371	Female	43	80	170	27.6817	1.7	6.1	121	293	45.5	8.05	11.9	68.3	76
number372	Male	62	66	165	24.2424	2.11	4.8	153	131	48.4	4.57	29.7	103.9	82
number373	Male	62	65	170	22.4913	296.26	12.2	133	165	37.3	6.18	50.1	85.3	114
number374	Male	66	68	168	24.093	7.55	6.64	105	119	27.3	7.61	12.7	71.8	139
number375	Male	62	76	172	25.6896	6.8	12.2	139	284	35	4.69	123.0	70.9	291
number376	Male	70	59	168	20.9042	2.62	10.1	137	294	37.5	4.64	9.4	119.6	119
number377	Male	50	72	165	26.4463	1975.58	6.31	128	230	28.2	4.45	17.4	78.1	174
number378	Male	64	72	167	25.8166	62.8	6.87	130	92	36.5	4.02	10.5	83.7	121
number379	Male	34	75	170	25.9516	17.7	5.93	159	207	39.9	4.38	7	48.6	82
number380	Female	73	63	155	26.2227	3.56	8.48	130	278	43.1	7.13	10.2	44.8	449
number381	Male	55	85	170	29.4118	19667.2	3.22	76	104	32.1	5.4	16.6	17.9	48
number382	Female	77	52.5	156	21.573	2.41	5.61	133	95	43.9	6.83	61.3	167.6	101
number383	Female	58	47	155	19.563	6.18	12.23	115	217	30.5	5.12	17.2	58.2	100
number384	Female	53	60	164	22.3081	1.38	4.43	116	195	39.8	4.9	12.9	10.1	83
number385	Female	47	80	162	30.4832	2.17	5.43	138	162	40.6	5.08	53.3	279.9	135.2
number386	Male	41	70	170	24.2215	3658.58	6.53	129	130	42.8	5.56	44.8	205.8	138
number387	Male	53	75	168	26.5731	983.15	3.27	145	116	41.9	7.13	26.7	55.9	70
number388	Male	41	73	176	23.5666	2.27	9.45	82	207	27.6	7.62	24.3	196.8	77
number389	Male	58	50	165	18.3655	55.59	5.22	136	272	36.5	4.27	12.4	9.8	87
number390	Male	81	85	169	29.7609	715.54	7.91	87	125	26.2	5.14	45	28.7	162
number391	Male	75	75	175	24.4898	3.57	7.06	155	186	43.2	7.35	23.1	21.2	78
number392	Male	77	65	160	25.3906	7.61	5.87	136	159	32.5	4.01	4.5	63	95
number393	Male	72	70	169	24.5089	4.39	8.42	140	177	41.6	4.98	28.2	27.1	81
number394	Male	59	60	169	21.0077	57.58	2.72	145	61	32.2	4.2	18.3	58.1	124
number395	Male	73	55	165	20.202	364.55	7.69	142	119	33.1	4.21	20.3	358.6	394
number396	Male	84	65	170	22.4913	7.02	4.78	132	347	32.6	4.08	9.6	78	69
number397	Male	57	77.5	173	25.8946	784.42	4.96	123	88	30.6	16.84	13.2	12.1	124
number398	Male	57	65	170	22.4913	4.95	4.42	133	230	37.1	4.71	26.6	10.9	99
number399	Male	56	79	168	27.9904	5242.21	5.11	149	144	33.4	5.77	11.7	49.6	66
number400	Female	58	54	165	19.8347	451.61	4.58	146	137	42.3	4.27	12.7	12.4	104
number401	Male	64	49.5	160	19.3359	15.28	2.75	133	70	36.7	4.32	17.2	13.9	162
number402	Male	53	72.5	170	25.0865	15.77	5.7	146	182	37.6	5.52	23.7	65.1	102
number403	Male	56	54	164	20.0773	2672.31	5.17	166	176	37.6	4.8	33.2	63.5	68
number404	Male	46	92	175	30.0408	4.11	6.07	155	193	38.3	5.52	38.3	281.2	89
number405	Male	73	50.5	160	19.7266	2.58	4.72	123	167	41.7	3.97	10.4	10.3	157
number406	Male	64	67.5	178	21.3041	1272.09	4.38	135	58	39.6	4.3	30.8	59.9	74
number407	Male	71	53.5	172	18.0841	12.15	16.21	119	204	34.7	6.65	79.8	190	75
number408	Male	75	68	180	20.9877	4.24	4.22	135	60	37.9	5	47.8	302.7	89
number409	Male	73	65	171	22.2291	3.88	3.11	140	67	39.1	5.47	19.6	145.6	125
number410	Male	79	56	165	20.5693	1.86	13.05	120	269	32.5	5.86	19.7	340	96
number411	Male	58	77	173	25.7276	11.96	6.05	153	167	34.4	5.15	58.1	378.9	168
number412	Male	90	60	158	24.0346	4569.86	6.16	85	123	26.8	4.21	39.8	62	138
number413	Male	65	58	164	21.5645	11.22	4.16	135	128	31.4	5.65	27.5	557.1	132
number414	Female	63	54	158	21.6311	4.47	7.19	145	255	35.4	6.14	161.9	572.7	721
number415	Male	75	62	168	21.9671	957.6	3.09	136	127	31.7	5.35	26.5	523.4	546
number416	Male	50	70	169	24.5089	252.68	8.71	128	160	27.4	5.06	20.1	46.4	170
number417	Male	47	65	160	25.3906	4.24	3.91	134	83	26.7	11.79	47.1	427.7	152
number418	Male	34	80	177	25.5354	2729.85	4.46	160	47	43.1	5.11	25.7	68.3	71
number419	Male	82	65	168	23.03	33.67	5.99	148	202	41.9	5.9	14.2	22.2	75
number420	Male	67	68	167	24.3824	4.03	3.51	164	199	41	9.59	56.9	811	65
number421	Male	55	60	170	20.7612	3.83	1.31	65	34	25.9	3.82	44.9	59.2	155
number422	Male	60	79.8	170	27.6125	434.48	4.92	173	148	47.6	6.1	18.7	319.7	98
number423	Male	50	65	164	24.1672	287.36	7.08	167	105	37.1	5.08	25.9	103.6	101
number424	Male	64	69	168	24.4473	2.35	5.47	120	186	34.7	9.04	16.4	310	143
number425	Male	41	60	170	20.7612	229.21	4.85	139	139	37.9	5.34	21	442.1	66
number426	Male	69	61	176	19.6927	1818.63	8.43	114	122	30	4.79	29	116.9	86
number427	Male	71	60	158	24.0346	2.8	6.25	126	184	27.4	4.4	25.8	96.3	122
number428	Male	48	73	170	25.2595	83.94	3.39	163	70	33.7	4.83	29.9	43.9	99
number429	Male	39	60	165	22.0386	2.23	4.74	106	105	38.7	5.85	22.3	33.3	145
number430	Female	64	60	158	24.0346	199.35	3.95	143	108	25.5	4.89	22.1	61.6	123
number431	Male	69	80	170	27.6817	3.83	8.12	146	167	36.8	5.82	28.8	83.4	146
number432	Male	64	66	180	20.3704	3.41	6.43	127	77	33.4	3.53	33.4	168.5	120
number433	Male	56	86	175	28.0816	62.74	4.82	130	107	34	8.15	32.3	22	161
number434	Male	66	62.5	170	21.6263	3.1	6.97	130	278	43.4	5.14	14.4	36.9	171
number435	Male	58	59	175	19.2653	3.27	3.43	138	137	25.3	4.61	34.6	31.2	200
number436	Male	55	76	175	24.8163	27.45	3.9	141	173	43.8	5.27	7	30.4	87
number437	Male	73	70	178	22.0932	5.68	7.63	143	159	34.9	6.17	12	88.7	104
number438	Male	78	53	170	18.3391	1799	4.52	132	217	38	4.63	11.3	18.3	101
number439	Male	61	53	163	19.9481	3.3	3.58	128	119	39	4.92	29.7	80.5	136
number440	Female	75	55	158	22.0317	3.8	8.52	136	224	45.9	5.57	18.1	14.3	67
number441	Female	66	55	156	22.6003	3.38	4.98	129	141	27.9	4.52	34.5	61.6	135
number442	Male	63	55	165	20.202	20.82	6.22	116	222	15	4.02	7.6	34.5	100
number443	Male	52	63	170	21.7993	27.82	7.79	180	195	37.1	6.47	25.6	218.4	123
number444	Female	74	47	150	20.8889	4.6	7.89	141	307	44.3	6.28	28.7	95.1	104
number445	Male	45	85	165	31.2213	4320.91	6.29	151	141	23.3	4.64	59.3	40.2	213
number446	Male	82	67	167	24.0238	2.63	6.26	122	154	40.1	4.6	14.4	31.3	258
number447	Male	81	55	160	21.4844	4.52	5.6	87	232	29.7	6.47	16	14.1	263
number448	Female	55	52	155	21.6441	9.42	2.66	121	100	45.5	5.41	21.4	16.7	289
number449	Male	75	67.5	164	25.0967	3.2	4.59	143	188	32.5	11.38	9.8	19.8	83
number450	Male	73	63	173	21.0498	1.24	5.84	147	156	38.5	4.79	18.2	16.2	87
number451	Male	73	62	170	21.4533	2.47	5.76	142	177	40.4	5.11	20.4	69.5	95
number452	Female	50	60	154	25.2994	1.05	2.13	151	127	40.7	5.16	28.6	10.9	82
number453	Male	38	69.5	163	26.1583	2.5	6.65	191	211	45.9	5.35	50.8	443	360
number454	Male	68	62	170	21.4533	3.92	4.35	117	172	32.7	13.73	38.4	106.4	120
number455	Male	71	72	163	27.0993	1.74	9.78	98	282	39.4	8.57	35.8	117.4	342
number456	Male	47	57	168	20.1956	4648.27	5.97	128	174	33	4.6	30.1	99.6	130
number457	Male	51	85	172	28.7317	4.43	6.66	139	109	45.7	6.47	21.4	48.4	136
number458	Male	56	61.4	160	23.9844	3977.83	8.32	134	111	37.8	4.46	16.5	52.3	177
number459	Male	75	69	176	22.2753	26.11	1.84	127	58	37.9	8.16	26.5	121	145
number460	Male	63	75	172	25.3515	545.37	8.44	146	207	35.8	8.63	20.2	191.4	95
number461	Male	66	58	160	22.6562	71.54	3.24	134	79	31	4.95	46.1	194.1	229
number462	Male	75	65	170	22.4913	3.08	4.48	142	192	35.3	4.74	22.3	21.6	73
number463	Female	68	48	150	21.3333	2.37	8.85	126	345	36.8	4.92	11.6	47.2	127
number464	Male	62	60	168	21.2585	7.63	13.91	140	192	38.8	4.76	17.1	15.9	85
number465	Male	72	60	170	20.7612	3.95	6.01	138	161	37.4	4.63	47	77	82
number466	Male	70	54.5	168	19.3098	2.31	32.16	102	235	38.3	10.15	27.8	58.4	121
number467	Male	71	72	158	28.8415	3.77	7.51	139	269	39.6	3.75	17.3	11.8	54
number468	Male	69	62	170	21.4533	152.57	7.06	142	61	36.2	5.08	40.3	24.5	45
number469	Male	65	50	170	17.301	32915.8	7.06	59	445	31.5	4.04	10.8	68	79
number470	Female	71	52	155	21.6441	4.6	6.53	135	163	42.9	4.45	12.8	18.4	88
number471	Male	66	70	168	24.8016	1877.04	3.94	157	179	36.3	7.89	55.5	352.8	190
number472	Male	34	75	170	25.9516	17.7	5.93	159	207	39.9	4.38	25.3	153.7	150
number473	Male	65	73	164	27.1416	57.92	6.69	159	259	35.9	6.86	18	84.4	121
number474	Male	55	68	164	25.2826	10.16	6.03	148	162	32.1	5.94	26.8	273.4	153
number475	Male	67	73	163	27.4756	31996.6	5.2	136	182	38.9	12.22	20.9	10.7	46
number476	Male	64	58	169	20.3074	811.9	2.93	137	47	37.3	3.92	27.3	29	52
number477	Male	50	70	170	24.2215	38.19	5.05	134	252	36.6	6.76	10.3	111.4	99
number478	Male	54	85	165	31.2213	140.46	4.48	145	224	43.7	5.67	18.1	94.7	76
number479	Male	59	57	156	23.4221	3.03	4.03	144	197	34.9	4.86	18	74.6	64
number480	Male	85	45	168	15.9439	1.05	3.19	103	127	36.6	4.52	94.7	228	147
number481	Male	67	55	160	21.4844	4.05	5.98	167	146	37.3	4.72	40.8	139.4	165
number482	Male	64	64	162	24.3865	8472.28	7.21	152	132	40.7	4.48	9.1	18	67
number483	Male	39	64	160	25	2429.18	3.24	144	77	39.3	4.25	10.9	96.2	44
number484	Male	73	58.5	158	23.4337	2.2	4.96	124	193	40.2	4.76	19.2	195	189
number485	Male	50	70	165	25.7117	54000	7.03	162	359	42.5	3.73	14.8	164.5	176
number486	Male	72	60	168	21.2585	6.09	5.74	118	210	41.4	4.56	8.4	424.2	199
number487	Male	56	70	170	24.2215	4.4	6.12	158	217	46	9.74	17.9	138	87
number488	Male	86	76	170	26.2976	4.49	4.72	129	108	36.5	8.29	18.8	28.7	45
number489	Male	55	65	169	22.7583	5.84	5.58	163	114	47.1	5.34	31.5	25.4	42
number490	Male	37	70	176	22.5981	6.44	4.25	154	109	38.3	4.93	26.7	189	178
number491	Male	52	62	162	23.6244	2.28	4.72	159	105	39.4	4.52	26.6	19.9	59
number492	Male	55	66	170	22.8374	398.58	4.9	164	175	35.8	4.52	18.2	314	201
number493	Male	60	60	168	21.2585	2.22	2.89	141	79	35.2	4.53	36.1	21.9	143
number494	Male	68	70	168	24.8016	4.5	5.31	125	178	38.4	5.46	12.1	20.3	101
number495	Male	45	90	162	34.2936	3.88	3.61	153	102	40.8	5.03	12.8	28	98
number496	Male	57	55	158	22.0317	533.36	6.88	140	97	45.3	5.74	19.9	21.8	89
number497	Male	50	78	179	24.3438	48700	5.47	166	212	44.1	8.43	52.3	16.8	78
number498	Male	72	64	160	25	3822.71	1.82	69	88	29	5.41	20.5	12.8	54
number499	Male	86	45	162	17.1468	4.39	5.2	126	231	38.7	4.48	17.4	27.2	67
number500	Male	53	74.5	172	25.1825	2.5	10.23	123	266	35.5	7.25	14.9	29.6	123
number501	Male	52	71.3	170	24.6713	54000	8.25	109	368	33.7	5.47	18.1	88.5	97
number502	Male	67	45	170	15.5709	2.35	3.86	147	182	26.8	5.16	16.8	168.4	165
number503	Male	75	54	167	19.3625	6.02	6.8	157	216	26.8	4.18	26.6	21.7	65
number504	Male	74	54	170	18.6851	2395.82	3.07	105	96	36.4	4.45	18.7	13.4	75
number505	Male	67	60	158	24.0346	26.79	1.88	98	110	36.4	5.06	23.5	13.2	87
number506	Male	47	80	173	26.7299	240.33	7.61	162	220	40.7	4.77	24.2	88.2	63
number507	Male	71	46	156	18.902	17.71	4.31	148	113	36.7	5.05	26.8	45.4	98
number508	Male	48	74	170	25.6055	4.54	5.31	165	136	47.1	5.41	23.5	54.7	64
number509	Male	79	53	152	22.9398	3.2	5.09	119	223	35.5	4.67	6.2	149	134
number510	Male	70	65	167	23.3067	56.32	3.33	142	188	38.8	4.8	21.4	261	234
number511	Male	52	59	170	20.4152	6.26	5.94	143	198	35.3	4.57	40.3	84	127
number512	Male	81	50	155	20.8117	4.47	5.61	149	308	40.8	5.21	9.5	36	67
number513	Male	60	63.5	175	20.7347	18.13	3.6	156	162	45	5.91	11.7	59.6	87
number514	Male	76	47	155	19.563	4.62	3.1	119	180	30.9	4.92	11.4	106.1	102
number515	Male	51	73	173	24.3911	5.03	6.16	166	161	45.5	5.16	24.6	251.1	176
number516	Male	78	55	160	21.4844	36.19	8.15	110	314	33.1	4.88	18.6	28.1	98
number517	Female	53	54	160	21.0937	4.09	4.89	125	192	46.8	5.11	32.7	41.1	67
number518	Male	56	81	172	27.3797	2.87	5.92	132	158	36.6	6.89	15.7	102.6	106
number519	Male	92	64	167	22.9481	5.01	3.79	134	105	37.8	6.1	29.5	47.9	78
number520	Male	49	90	170	31.1419	645.56	5.88	136	124	42.9	4.62	10	281.5	321
number521	Male	77	50	168	17.7154	12.36	6.17	140	158	32.8	5.54	35.1	78.3	56
number522	Male	68	68	168	24.093	6.27	6.44	140	192	38.3	4.8	16.5	199.6	201
number523	Male	50	62	170	21.4533	3.47	4.71	158	243	38.3	4.58	45.5	73.9	145
number524	Male	44	82	180	25.3086	5719.52	6.24	154	266	45.3	5.44	19.2	67.7	165
number525	Male	78	46.5	170	16.09	6.76	5.86	130	142	39.5	4.72	29.4	228	198
number526	Male	48	62.5	173	20.8828	145.39	3.84	152	90	46.2	5.58	17.5	25.7	57
number527	Male	47	72.5	172	24.5065	5.51	8.2	141	207	42.5	4.38	10.2	16.1	98
number528	Male	70	60	162	22.8624	5.38	5.61	136	214	39.5	11.09	18.5	39.7	64
number529	Male	61	61.5	158	24.6355	6.35	3.38	82	33	35	6.69	15	108.6	83
number530	Male	74	63	162	24.0055	779.32	5.03	163	124	43.1	4.28	25.3	19.3	76
number531	Female	80	48	160	18.75	15848.8	6.57	127	199	37.1	10.2	10.8	34.6	98
number532	Male	67	58	160	22.6562	389.93	5.2	154	151	48.5	8.92	14.3	13	47
number533	Male	62	83	168	29.4076	2.88	5.35	169	206	31.5	6.54	18.6	232	108
number534	Female	45	60	158	24.0346	3.7	4.32	125	175	39.7	4.96	21	151.9	59
number535	Male	81	45	155	18.7305	334.81	5.54	131	215	35.3	4.7	18.1	224.6	110
number536	Female	58	64	163	24.0882	16.31	2.7	138	90	31.7	4.65	21.6	60.7	193
number537	Male	52	70	162	26.6728	33733.7	5.34	173	145	34.3	5.69	39.4	66.6	93
number538	Female	72	42.5	145	20.214	46.94	4.94	127	149	37.9	4.19	28.4	65.4	74
number539	Male	60	57	164	21.1927	3.31	5.14	157	106	33.9	6.43	38.6	116.3	102
number540	Female	60	57.4	155	23.8918	3.79	2.69	140	69	32.7	5.94	41.4	89.6	119
number541	Male	69	67	165	24.6097	24.16	5.03	113	98	29.3	7.02	17.7	50.2	138
number542	Male	68	66.5	175	21.7143	64.37	7.29	147	325	35.9	5.44	14.5	343.2	603
number543	Male	73	78	170	26.9896	2.68	5.98	162	188	37.1	5.93	28.2	11.3	73
number544	Female	76	54	156	22.1893	46.2	2.06	82	84	28.5	6.15	27.9	14.2	83
number545	Male	86	46	154	19.3962	3.53	9.18	151	113	32	5.31	22.3	143	49
number546	Male	44	81	165	29.7521	8.93	5.96	164	209	45.8	4.99	16.1	22.6	96
number547	Male	56	55	159	21.7555	43.36	3.24	143	44	40.3	6.02	46.7	211.9	112
number548	Male	57	80	170	27.6817	3000	8.07	175	257	38.4	6.11	18.6	56.1	58
number549	Female	48	66	155	27.4714	200.23	2.15	125	23	34.3	4.56	58.8	42.6	116
number550	Male	73	48	160	18.75	5.8	3.21	146	74	34.6	14.29	44.9	40.9	96
number551	Male	74	60	172	20.2812	7.06	6.51	142	220	30.4	5.38	32.6	239.5	116
number552	Male	74	56	158	22.4323	1.44	3.28	125	88	40	4.36	14.8	8.5	59
number553	Male	74	58	169	20.3074	1.96	5.61	119	318	38.8	8.48	76.1	76.1	180
number554	Male	71	51	160	19.9219	427.5	6.74	95	195	32.8	5.02	12	12.4	124
number555	Male	64	50	169	17.5064	4.2	4.2	137	230	40.1	4.88	19.2	32.9	84
number556	Male	67	44	151	19.2974	6.42	6.67	152	148	41.4	4.89	11.7	40.7	157
number557	Male	66	60	168	21.2585	49.73	6.47	141	171	41.7	4.78	13.4	11.3	117
number558	Male	70	55	165	20.202	55.54	5.42	123	174	39	4.4	17.3	12.5	61
number559	Male	54	80	172	27.0416	8413	5.18	144	90	38.7	4.53	22.2	65.9	98
number560	Male	62	77	178	24.3025	8878.48	3.13	126	61	31.8	4.77	26.7	32.1	107
number561	Male	87	56	162	21.3382	5.49	5.36	137	169	35.3	4.67	23.5	12	66
number562	Male	70	49	160	19.1406	5.03	4.66	101	82	39.9	3.87	24.4	25.8	97
number563	Female	77	53	155	22.0604	9.3	7.62	131	139	44.2	5.76	16.9	14.3	152
number564	Male	49	78.3	170	27.0934	8.32	1.95	86	63	34.2	7.25	21.4	30.2	133
number565	Male	71	62	172	20.9573	791.27	4.19	85	140	31	7.41	8.5	19.7	98
number566	Male	66	68.7	158	27.5196	3.58	6.52	169	147	48	5.82	33.4	32.1	104
number567	Male	40	78	178	24.6181	2396.07	7.91	153	139	43.4	5.42	31.3	59.6	104
number568	Male	71	57	167	20.4382	3433	2.68	115	103	36.9	5.2	16.2	12.5	89
number569	Male	55	75	170	25.9516	4.59	5.4	155	127	38.4	5.73	15.2	36.9	69
number570	Male	80	67	167	24.0238	76.69	4.46	154	197	26.9	8.8	17.2	60.8	51
number571	Male	40	67	168	23.7387	3177	7.91	140	219	32.7	4.26	13.6	47.7	453
number572	Female	54	47	155	19.563	7868.31	4.12	140	118	40.4	4.53	17.5	121.7	63
number573	Male	84	63	164	23.4236	3.69	6.1	127	217	40.7	4.59	14.8	22.3	128
number574	Male	56	68.5	170	23.7024	4.34	2.94	108	55	41.1	7.17	90.6	116	85
number575	Male	74	63	163	23.7118	1.79	4.8	111	292	36.2	8.75	382.3	207.6	515
number576	Male	67	74	154	31.2026	10.42	5.2	121	81	38.5	4.65	22.8	24.6	125
number577	Male	89	74	180	22.8395	87.38	5.64	109	139	36	5.33	18.9	178.9	60
number578	Female	67	57	147	26.3779	1186	3.32	138	104	46.9	6.04	25.6	23.8	179
number579	Male	65	65	150	28.8889	1.07	10.28	154	323	38.8	5.41	13.5	17.5	133
number580	Male	75	75	173	25.0593	6.47	7.2	109	331	29.3	7.81	61.1	41.8	380
number581	Male	66	75	171	25.6489	4.96	6.1	152	285	42.6	7.15	28.8	50	149
number582	Male	58	90	180	27.7778	22.73	4.72	142	247	37.6	6.43	17.4	58.4	85
number583	Male	70	62	173	20.7157	246.52	4.22	129	84	34.6	4.6	26.4	52.6	212
number584	Male	40	51	168	18.0697	2227.89	3.79	161	203	46.6	4.47	37.9	44.9	113
number585	Male	40	78.5	178	24.7759	2396.07	7.91	153	139	43.4	5.42	31.3	59.6	104
number586	Male	70	67	168	23.7387	1158.43	6.64	148	251	34.5	5.41	10.7	35.3	215
number587	Male	57	65	170	22.4913	54000	7.17	140	282	32.1	4.37	18.7	85	137
number588	Male	74	60	165	22.0386	139.6	6.1	108	176	30	5.03	37.4	8.7	200
number589	Male	60	85	168	30.1162	11.36	13.37	164	229	31.9	14.93	9.2	60.4	211
number590	Female	67	59	150	26.2222	3.21	8.64	133	197	39.1	7.63	9.2	42.1	147
number591	Male	75	65	165	23.8751	270.6	6.44	140	267	42.4	8.67	16.9	69	145
number592	Male	74	70	175	22.8571	2.06	6.24	112	64	33.2	11.38	8.6	54	45
number593	Male	59	62	170	21.4533	7.57	2.53	138	74	40.6	4.34	18.2	33.1	66
number594	Male	52	65	170	22.4913	5.16	2.12	122	107	40.5	5.73	19.3	9.6	86
number595	Female	70	70	158	28.0404	1.86	5.16	118	285	36	3.84	21.4	873.9	298
number596	Male	62	77	168	27.2817	4.79	2.85	114	112	39.3	4.53	28.7	23	74
number597	Male	65	75	186	21.6788	3.51	2.92	143	89	33.7	5.18	35.1	674.6	54
number598	Male	72	54.5	158	21.8314	5.06	5.56	155	170	34.3	5.57	46.4	95	79
number599	Male	57	55	170	19.0311	1580.78	4.49	116	49	32.2	3.67	20.3	11.2	148
number600	Male	84	40	158	16.0231	10.77	8.12	127	159	31.7	3.43	32.2	8.3	85
number601	Female	54	58	160	22.6562	3.26	7.6	125	221	39.2	6.4	10.7	165	393
number602	Male	62	60	171	20.5191	6.2	7.98	89	108	25.2	4.03	102.7	227.4	277
number603	Female	46	62	157	25.1532	6.15	6.02	101	140	32	4.85	27.9	49.5	224
number604	Female	59	54	163	20.3244	7.7	6.3	109	110	27.8	5.52	24.2	259.1	115
number605	Male	71	50	165	18.3655	211.43	6.91	131	197	34	4.48	22.6	143	131
number606	Male	43	65	165	23.8751	18000	3.7	140	81	41.1	4.74	22.9	89.5	150
number607	Male	59	60	163	22.5827	2.58	7.56	144	180	36.4	5.63	91.1	214.8	259
number608	Male	75	60	160	23.4375	119.86	6	123	328	37.3	4.63	10.1	19.4	84
number609	Male	42	67	165	24.6097	132.21	7.59	152	294	38.8	4.88	24.2	55.5	80
number610	Male	59	75	164	27.8852	265.1	9.06	144	245	36.9	9.87	11.7	31.9	150
number611	Male	81	62	173	20.7157	119.3	2.78	121	102	35.5	4.59	24.9	32.1	84
number612	Male	76	75	168	26.5731	6.98	7.98	147	160	33.5	9.76	30.2	246	90
number613	Male	59	78	164	29.0006	19.29	3.47	130	98	37.9	5.2	17.3	26.6	57
number614	Female	47	75	160	29.2969	12.51	4.4	122	171	34.5	4.96	13.4	29.8	63
number615	Male	54	63	171	21.5451	111.71	3.74	158	137	39.5	6.72	25	63.3	63
number616	Male	44	82	170	28.3737	864.7	5.22	130	123	28.7	4.04	57.5	245.5	91
number617	Male	52	75	172	25.3515	46.31	3.96	126	65	29.6	5.55	51.4	89.1	143
number618	Male	48	66	158	26.4381	2.55	4.74	147	138	46.7	6.09	29.9	122.2	72
number619	Male	72	59	158	23.634	55.65	4.6	164	107	42.9	4.93	18.9	48.6	60
number620	Male	53	63	165	23.1405	11000	16.66	91	356	32	5.52	69.1	21.9	195
number621	Male	68	75	165	27.5482	3.14	2.4	136	67	43.1	7.23	22.4	19.2	101
number622	Male	54	64	165	23.5078	4575.35	7.55	144	164	27.5	5.85	34.4	38.8	124
number623	Male	72	56	168	19.8413	200.13	3.8	150	223	38.6	4.88	24.6	394.4	69
number624	Male	80	66.4	170	22.9758	8.31	5.07	155	189	38	6.85	11.3	15.9	71
number625	Female	63	52	155	21.6441	217.63	3.5	121	108	46	4.79	21.5	23	81
number626	Male	61	69	170	23.8754	79.16	12.7	69	122	30.2	6.29	21.2	409.6	77
number627	Female	60	60	155	24.974	368.42	6.49	135	123	39.6	4.43	15.4	51.7	127
number628	Male	70	70	185	20.4529	3.74	7.01	137	425	34.2	4.68	6.3	29.9	123
number629	Male	66	50	170	17.301	35.25	3.6	143	72	39.6	3.79	35.6	23	77
number630	Male	50	70	175	22.8571	5.73	3.22	155	133	38.6	4.33	18.3	200	99
number631	Male	75	70	168	24.8016	4.82	4.48	69	76	27.1	7.65	13.6	83.4	174
number632	Female	66	55	152	23.8054	213.9	4.2	113	129	39	5.07	11.8	11.3	61
number633	Male	69	77	172	26.0276	2.94	4.85	157	106	42.3	7.74	25.9	59	62
number634	Male	71	57	151	24.9989	1.72	5.89	148	112	38.9	6.61	22.6	35.3	99
number635	Male	59	77	170	26.6436	12.28	3.32	125	124	43.8	4.05	15.3	36.2	116
number636	Female	72	66	160	25.7812	3.1	4.11	120	154	39.2	5.36	20.9	255.9	113
number637	Male	44	90	180	27.7778	31.01	5.72	139	104	38.4	6.06	34.9	41.1	162
number638	Male	58	73	170	25.2595	18.33	7.57	153	191	34.6	5.42	39.7	180.2	600
number639	Male	84	53.7	150	23.8667	2.07	4.04	106	139	35	4.53	11.6	10.6	66
number640	Male	74	55	167	19.721	9.03	6.69	150	144	30.8	5.08	25.8	188.8	91
number641	Female	70	45	152	19.4771	2.87	9.45	148	187	34.7	5.05	26.6	31.5	356
number642	Male	60	70	170	24.2215	1959	6.49	164	166	39.4	5.14	16.6	60.4	86
number643	Female	43	50	160	19.5312	4.01	5.22	121	207	37.6	5.6	18.2	13.5	56
number644	Male	48	68	170	23.5294	20.28	3.89	167	53	36.2	4.74	47.3	52.4	149
number645	Male	69	62	174	20.4783	3.68	4.9	126	111	34.9	6.4	15.3	161.5	931
number646	Male	46	81	172	27.3797	6.71	5.6	163	149	32.2	5.67	24.9	61	66
number647	Male	69	60	158	24.0346	11.12	3.32	142	65	35.8	4.98	21.7	40.8	89
number648	Female	63	56	156	23.0112	1200	3.67	121	82	33.5	4.56	25.8	107.5	160
number649	Male	74	81	170	28.0277	467.92	11.62	112	389	35.4	4.8	19.1	134.6	315
number650	Male	59	72	168	25.5102	748.45	6.2	152	97	37.5	8.99	31.9	227.9	152
number651	Male	57	60	170	20.7612	5475.18	3.65	149	109	33	4.67	30.6	88	111
number652	Female	77	56	150	24.8889	2.21	2.91	123	232	35.7	4.94	8.6	9.9	94
number653	Male	65	70	170	24.2215	37.89	4.81	164	106	33.7	4.74	30.7	325.7	275
number654	Male	70	58	163	21.83	5.76	3.78	96	135	34.9	4.73	8.1	7.1	64
number655	Male	51	59	158	23.634	4.18	5.31	161	181	34.6	4.83	7.3	55.3	46
number656	Male	81	60	168	21.2585	3.86	3.9	142	169	29.3	4.74	25.2	42.5	63
number657	Male	30	60	160	23.4375	47.05	5.5	170	135	39.5	4.62	32.6	80.3	106
number658	Male	81	65	165	23.8751	223.43	4.49	131	71	25.3	6.62	29.3	41.9	227
number659	Male	74	63	165	23.1405	2.11	5.02	144	112	39.4	5.18	27.4	17.3	58
number660	Female	70	46	162	17.5278	1.92	2.96	134	96	34	4.01	27.4	45.7	142
number661	Male	77	64	175	20.898	726.42	5.06	122	225	34.7	5.42	13.8	77	81
number662	Male	41	60	170	20.7612	229.21	4.85	139	139	37.9	7.39	20.3	850.8	66
number663	Male	65	70	170	24.2215	1.68	4.1	160	69	42.8	5.57	28	21.8	72
number664	Male	59	54.3	165	19.9449	7.58	6.97	159	262	37.6	4.39	23.1	130.5	139
number665	Male	64	60	160	23.4375	25.9	4.24	142	195	38.9	3.81	27	236.2	91
number666	Male	46	55	169	19.257	2681.58	5.4	115	164	36.6	5.4	43.1	132	215
number667	Female	72	48	155	19.9792	2.03	4.25	110	257	33	4.46	19.3	138	96
number668	Male	58	76	170	26.2976	4.12	4.9	118	98	30.8	3.97	31.6	156.2	121
number669	Male	33	60	170	20.7612	54000	7.97	161	534	37.1	4.38	39.5	85.9	102
number670	Male	38	79	169	27.6601	420.28	8.11	160	245	40.6	4.32	25	149.9	96
number671	Female	47	50	160	19.5312	7.25	5.3	140	196	40.1	5.61	16.6	18.4	108
number672	Male	55	62	165	22.7732	5.73	8.09	135	265	36	4.61	25.6	56.2	300
number673	Male	39	70	163	26.3465	2.5	6.65	191	211	39.3	3.73	258	66.8	1816
number674	Male	66	60	165	22.0386	1.73	9.5	122	53	24.3	4.85	20.8	27	133
number675	Male	67	77	170	26.6436	6.7	5.83	139	196	37.7	4.3	25.7	12.3	84
number676	Male	66	64	170	22.1453	2.9	4.34	138	102	40.8	5.02	15.6	85	84
number677	Male	82	66	168	23.3844	1450.29	6.47	139	132	38.6	7.25	14.2	122.5	86
number678	Male	46	58	165	21.3039	9.84	7.5	116	104	34.7	4.84	19.2	293.1	650
number679	Male	82	46	160	17.9687	1.87	5.85	153	301	40.3	4.42	25	24.4	100
number680	Female	73	50	159	19.7777	2.25	5.35	103	165	27.8	4.94	50.2	35.7	124
number681	Male	60	90	180	27.7778	2.12	5.62	175	122	39.6	5.44	45.7	147.1	76
number682	Male	54	74	170	25.6055	5.08	6.56	174	164	38.7	6.39	37.8	74	69
number683	Male	65	71	165	26.079	31.95	6.92	148	211	38.1	5.14	26.2	111.1	135
number684	Male	52	65	160	25.3906	45.6	1.84	137	86	37.6	4.7	40.7	21.8	210
number685	Male	55	74	167	26.5338	3.06	3.98	153	67	37.2	6.4	34.5	22.1	123
number686	Female	53	59	160	23.0469	1637.85	3.82	145	115	36.1	4.9	20.1	237.7	137
number687	Male	42	48	170	16.609	8939.1	3.26	126	126	32.4	4.52	36.7	81.6	100
number688	Male	79	75	165	27.5482	3.3	5.3	147	115	43.1	5.04	2.3	24.1	83
number689	Male	43	88	170	30.4498	5.62	5.76	149	170	35	5.48	15.8	215.6	83
number690	Male	63	58	170	20.0692	930.96	1.8	117	61	37.2	4.63	4.8	466.3	200
number691	Male	64	56	165	20.5693	9.04	2.1	132	44	36	4.64	26.5	50.1	141
number692	Male	64	64	165	23.5078	4042.83	3.9	166	159	35.1	5.44	25.8	97.8	150
number693	Male	49	66	165	24.2424	2094.65	2.5	137	52	28.4	4.37	57.6	27.7	140
number694	Male	53	81	170	28.0277	3.11	5.19	157	158	42.7	6.77	25.5	55.9	114
number695	Male	57	82	172	27.7177	3.46	5.69	159	100	38	6.46	53.2	36	90
number696	Male	51	74	170	25.6055	1385.75	2.79	112	80	34.1	5.9	14.3	31	83
number697	Female	42	60	162	22.8624	117.3	4.7	117	93	37	5.25	29.4	133.2	113
number698	Male	77	56	170	19.3772	99.47	5.46	127	108	36.6	4.49	30.2	328.9	109
number699	Female	67	40	150	17.7778	2.38	4.88	104	174	39.2	5.17	41.2	101.9	75
number700	Male	70	70	165	25.7117	11.75	5.65	142	148	40.2	4.92	17	177	124
number701	Male	63	74	170	25.6055	3.24	6.46	143	184	41.2	7.32	32.7	159.2	67
number702	Male	42	78	168	27.6361	2.05	7.11	147	209	43	5.9	43.9	375.6	77
number703	Male	52	67	179	20.9107	17029.7	8.12	147	232	38.2	4.44	15.2	68.9	169
number704	Male	68	63	160	24.6094	8.61	6.32	140	173	39.4	7.32	31.4	248.4	158
number705	Female	55	56	166	20.3223	1.78	7.27	111	199	27.7	8.3	41.6	492.9	200
number706	Male	62	52	160	20.3125	203.13	4.51	118	82	37.2	6.91	25.5	73.5	180
number707	Male	53	60	163	22.5827	78.44	6.15	136	287	32.1	4.76	19.6	30.8	100
number708	Male	74	58	165	21.3039	9533.47	9.43	147	211	38	9.16	34.4	330.7	716
number709	Male	57	75	163	28.2284	2.49	6.88	156	250	35.8	13.94	28	925.6	49
number710	Male	80	50	156	20.5457	4.06	5.93	137	103	35.6	4.02	23.6	15.5	46
number711	Male	58	65	155	27.0552	3.7	12.22	137	242	37.7	4.13	16.6	104.4	96
number712	Male	58	76	162	28.959	7.76	8.46	157	268	39.3	6.45	25.6	104.9	84

## Sheet: HC
	Sex	Age	Weight(Kg)	Height(cm)	BMI	AFP	WBC	Hb	PLT	ALB	GLu	TBIL	ALT	ALP
number1	Male	50	85.7	180	26.4506	1.72	6.57	148	240	46.3	4.89	25.1	21.5	63
number2	Male	75	59.2	163.5	22.1455	3.39	6.61	147	194	43.3	5.44	16.8	16	71
number3	Male	47	58	166	21.048	3.82	6.98	152	260	45.9	4.68	43.9	26	62
number4	Male	49	86.6	175.5	28.1167	2.17	6.86	158	202	45.1	6.75	15.2	32	67
number5	Male	56	63.8	171.5	21.6916	3.27	5.93	150	252	45.6	6	18	18.4	113
number6	Male	54	77.5	170.5	26.6596	5.52	6.33	151	177	48.2	6.18	24.8	38.1	53
number7	Male	60	80.6	169.5	28.0541	4.83	6.54	154	254	44.7	4.77	18.1	13.4	99
number8	Male	52	71.5	171	24.452	2.34	5.97	151	193	43.5	4.67	14.8	22.5	91
number9	Male	57	79.3	173	26.496	5.85	6.17	170	261	46.4	5.05	24.6	27.8	74
number10	Male	63	75.2	174	24.8382	3.07	6.66	152	244	43.1	5	14.6	23.6	69
number11	Male	92	85.6	181	26.1286	1.26	7.84	132	266	40.1	5.4	16.6	19.9	68
number12	Male	62	67	163	25.2174	4.48	4.13	142	168	42.2	5.23	26.4	34.5	83
number13	Male	70	84.9	171	29.0346	4.17	6.15	136	205	42	6.72	9	24.4	73
number14	Male	54	65.1	162	24.8057	1.96	7.19	154	205	50.9	5.67	32.1	17.8	70
number15	Male	75	81.3	168.5	28.6346	3.09	5.01	156	144	41.2	4.62	14.9	16.6	73
number16	Male	57	61.7	169	21.6029	1.82	4.93	157	153	41	5.29	12.7	18.9	87
number17	Male	79	63.6	166	23.0803	1.87	3.47	130	203	40.3	5.33	9.7	17.9	61
number18	Male	84	73.9	167	26.4979	2.48	7.08	162	216	45.5	6.45	11.6	13.5	36
number19	Male	73	64.3	153	27.4681	2.45	7.78	165	205	45.9	6.88	15	42.7	88
number20	Male	61	78.2	170.5	26.9004	1.02	4.07	142	193	44.6	5.23	16.7	27.4	98
number21	Male	83	79.2	169	27.7301	2.3	6.74	140	205	44.4	5.79	15.4	13.4	57
number22	Male	73	57.4	171.5	19.5157	2.59	4.88	135	217	43.7	7.04	10.3	32.7	69
number23	Male	64	68.8	168.5	24.232	2.46	8.16	153	190	39.7	10.24	14.7	11.8	67
number24	Male	63	73.5	157	29.8187	2.31	4.48	139	232	42.1	5.15	16.1	14.3	62
number25	Female	65	61.1	161	23.5716	4.06	4.72	129	114	43.9	5.66	8.6	11	105
number26	Male	60	55.4	162	21.1096	1.5	4.81	141	203	43.2	6.93	11.5	14.6	73
number27	Male	62	86.6	169.5	30.1424	2.11	5.2	152	178	46.8	5.14	13.4	17	41
number28	Male	80	55	159	21.7555	4.06	6.59	137	234	42.7	4.53	10.9	16	79
number29	Male	52	85.2	177.5	27.0423	1.77	5.41	143	239	42.4	5.07	16.3	35.5	52
number30	Female	40	46.7	159	18.4724	1.74	6.2	129	231	44.1	4.39	6.9	11.9	45
number31	Male	54	62.9	161	24.266	4.58	4.88	163	186	44.6	4.57	14.2	28.3	68
number32	Male	65	52.4	168.5	18.4557	1.4	3.09	142	161	42.1	5.49	9.5	13.3	59
number33	Female	64	58.8	154.5	24.6332	1.59	3.68	129	186	42.1	6.42	10.1	14	74
number34	Male	48	62	170	21.4533	3.21	5.29	161	207	43.2	5.69	9.2	10.5	86
number35	Male	58	80.1	174.5	26.3052	5.17	4.65	142	211	41.5	6.32	47.7	18	61
number36	Male	63	69.2	165	25.4178	3.58	7.29	149	256	43	9.61	14.3	17.5	76
number37	Male	43	64.4	168.5	22.6822	2.34	4.86	155	162	45.4	4.95	9	19.9	76
number38	Male	60	55.6	167.5	19.8173	2.45	3.94	164	129	46	5.03	16.8	14.9	88
number39	Male	50	72.7	173	24.2908	1.81	6.52	150	166	43.9	5.21	25.9	17.4	82
number40	Male	56	61.6	167.5	21.9559	1.66	8.03	136	235	49.1	8.73	12.2	24.4	52
number41	Male	56	81.6	172.5	27.4228	2.3	6.03	152	289	48.2	6.5	12	19.8	76
number42	Male	66	59.9	159	23.6937	1.43	6.38	147	276	43.2	4.58	12.7	21.7	109
number43	Female	47	61.6	163.5	23.0433	4.17	5.27	141	227	43.3	4.81	15.4	14.3	61
number44	Female	49	63.4	162.5	24.0095	1.88	4.51	128	213	43.3	4.46	10	12.8	45
number45	Male	56	55.8	165.5	20.3722	4.09	6.95	151	185	42.9	4.99	12.5	47.4	69
number46	Female	81	51.2	149	23.062	1.81	5.63	125	186	39.9	9.51	10.2	8.4	52
number47	Male	46	63.4	164	23.5723	2.77	4.69	143	232	42.3	4.94	16.3	15.8	66
number48	Female	48	51.6	158.5	20.5396	2.91	4.58	143	165	46.1	5.02	14.9	19.9	46
number49	Male	62	58.2	166	21.1206	1.66	3.74	153	169	46.8	5.29	17.5	21	47
number50	Male	60	66.1	166	23.9875	3.06	7.88	173	230	45.8	8.45	13.9	13.7	89
number51	Female	54	50.7	153.5	21.5175	2.4	5.94	152	262	41.2	5.28	6.6	15.6	73
number52	Male	91	67.7	160	26.4453	1.28	6.61	120	128	43.2	5.87	14.3	22.2	74
number53	Male	65	60.1	159	23.7728	3.85	4.18	162	225	45.3	5.67	13.1	15.6	74
number54	Male	46	68.1	172	23.0192	5.39	4.44	152	236	46.1	4.92	19.9	12.7	63
number55	Female	52	58.7	165	21.5611	0.96	5.77	131	220	43.4	5.36	11.9	10.3	66
number56	Male	59	86.4	166.5	31.1663	2.16	7.05	153	209	42.3	4.89	15.4	35.4	89
number57	Female	73	47.1	149	21.2153	1.41	6.04	107	159	45.7	7.26	14	14.9	88
number58	Male	55	63.8	165	23.4343	1.83	5.09	145	175	41.5	4.94	12.1	14.4	74
number59	Male	81	60.3	161.5	23.1192	3.66	6.71	143	309	47.5	6.97	24.5	13.5	55
number60	Male	40	70.3	164	26.1377	2.36	3.46	165	142	46.3	5.6	26.2	18.4	77
number61	Female	41	56.6	149.5	25.3241	1.26	6.36	133	169	43.7	4.62	22.6	11.7	89
number62	Male	67	48.6	156	19.9704	3.46	8.14	148	178	44.6	5.26	17	14.8	84
number63	Female	52	57.3	162	21.8336	3.17	4.22	132	179	45.5	5.41	11.4	14.8	51
number64	Female	53	54	149.5	24.1608	3.23	5.27	144	188	43.5	4.3	12	27.9	66
number65	Male	52	78.5	172	26.5346	2.34	6.59	169	142	46.4	5.15	24	28.8	40
number66	Female	65	53.8	157.5	21.6881	2.64	6.2	123	227	42.8	4.76	8.6	23.5	107
number67	Male	57	69.8	166	25.3302	2.75	9.62	145	295	48.5	6.36	8.9	12.4	77
number68	Female	52	65	163	24.4646	2.68	6.87	139	327	42.5	4.53	12.5	24.2	85
number69	Male	53	86.4	174.5	28.3742	2.55	6.35	139	210	45	5.69	6.1	19.2	65
number70	Female	54	53.3	160	20.8203	5.8	3.78	129	194	45.7	4.93	10.1	14.4	87
number71	Male	46	55.7	163	20.9643	2.45	6.68	169	220	47.1	4.71	17.6	20.7	142
number72	Male	61	68.6	166.5	24.7455	3.36	5.23	147	192	43	4.81	20.5	17.2	61
number73	Male	55	71.8	167	25.7449	2.79	8.05	147	230	43.7	4.96	10.1	11.8	65
number74	Male	64	56.4	157	22.8813	3.43	5.47	158	238	48.1	4.85	20.7	30.5	65
number75	Female	53	62.4	167	22.3744	2.57	3.03	148	175	46.3	5.38	11.4	14.9	74
number76	Male	54	66.8	160	26.0937	2.32	5.2	145	241	43.1	7.24	12.2	12.4	63
number77	Male	53	76.3	160	29.8047	2.17	5.47	153	154	44.2	4.49	15.7	30.8	64
number78	Male	70	73.7	174.5	24.2034	3.58	5.33	149	221	45.4	5.96	21	17.1	84
number79	Male	53	74.2	175	24.2286	2.25	8.28	155	339	50.1	5.76	9.4	23.5	54
number80	Female	62	47.2	156	19.3951	3.86	6.85	124	261	46.3	7.63	11.4	17.2	73
number81	Male	66	67.1	176	21.6619	2.82	6.62	154	190	45.9	5.18	10.9	12.1	55
number82	Female	61	59.8	161	23.0701	1.87	6.16	132	274	43.1	5.04	10.7	19.6	68
number83	Male	55	80.5	162	30.6737	2.04	7.07	153	149	42	6.85	24.8	46.1	63
number84	Female	40	58.1	159.5	22.8378	8.22	5.68	133	236	46.3	4.88	12.3	18.5	48
number85	Male	55	89	175	29.0612	3.32	9.83	173	198	46.4	4.69	23.4	15	65
number86	Female	46	60.2	160	23.5156	2.81	5.03	111	222	42.9	4.68	8.6	11.3	70
number87	Male	51	71.3	157	28.9261	4.18	5.8	145	265	43.5	5.04	8.8	14.7	31
number88	Male	64	96.4	176.5	30.9448	1.91	4.44	145	141	45.9	6.77	30.5	62.7	63
number89	Male	57	63.5	161	24.4975	2.26	5.74	156	210	44	4.53	14.9	18.2	85
number90	Male	42	70.8	173	23.656	5.52	5.74	158	220	45.2	5.52	26.9	12.2	47
number91	Male	43	66.1	166	23.9875	6.87	4.79	148	179	47.3	5.32	11.3	23.2	83
number92	Male	56	66	155.5	27.295	2.75	4.84	154	212	46	6.9	18.9	32.4	68
number93	Male	56	65.3	162	24.8819	1.37	4.77	148	224	44.7	6.6	13.5	18.9	73
number94	Male	44	69.8	169	24.4389	2.91	9.15	150	255	42.1	4.52	12.4	28.1	125
number95	Male	45	75.1	167	26.9282	1.33	5.09	149	275	45.6	5.07	12.8	14.9	55
number96	Male	44	74.8	173	24.9925	1.15	4.52	152	214	44	5.12	20.6	27.1	63
number97	Male	38	69.3	164.5	25.6095	3.11	9.13	152	308	46.5	4.78	8.5	14.2	87
number98	Male	56	60.7	165	22.2957	5.51	11.05	145	389	42	5.18	6.7	12.3	72
number99	Male	56	62.2	165	22.8466	5.06	5.79	147	271	45.1	5.01	12.5	13.7	67
number100	Male	36	66.6	159.5	26.179	2.53	8.26	152	257	45.9	5.31	18	33.1	55
number101	Male	40	68.1	176	21.9848	6.45	4.45	150	191	46.1	4.79	16.9	18.6	110
number102	Female	39	55.2	161.5	21.1638	2.21	5.94	131	216	48.4	5.1	13.5	38.7	78
number103	Male	49	63.2	159.5	24.8425	2.93	7.48	134	215	45.2	5.43	9.7	23.5	51
number104	Male	51	84.9	179	26.4973	1.69	5.27	141	230	43.6	4.77	11.9	18.7	67
number105	Male	48	87.2	171.5	29.6475	1.92	5.18	153	199	43	8.22	13.5	15.7	108
number106	Male	56	68	168	24.093	2.77	5.92	157	171	46.5	5.69	19.5	45.3	89
number107	Male	38	70	172	23.6614	2.07	3.99	144	166	46.2	5.27	12.9	15.2	43
number108	Male	48	72.4	171	24.7598	3.03	8.65	154	231	45.7	5.28	16.4	19.8	65
number109	Male	67	68.7	165.5	25.0819	2.89	5.29	153	160	46.1	4.91	16.8	22.9	58
number110	Male	55	80.9	173	27.0306	5.04	7.49	139	191	45.6	6.25	11.4	22.4	86
number111	Female	39	60.8	170	21.0381	3.85	3.99	122	252	46.2	4.97	12.5	18.8	47
number112	Male	36	70	170	24.2215	2.42	4.98	154	247	43.8	4.52	13.6	27.3	69
number113	Male	83	62.2	170	21.5225	1.42	8.34	149	193	46	6.85	23.5	21	115
number114	Female	49	51.7	154	21.7996	2.6	5.43	124	313	43.7	4.36	24.2	7.5	62
number115	Male	50	70.6	166	25.6206	6.73	5.41	167	106	43.8	6.57	26.5	34.1	73
number116	Male	47	86.6	188	24.502	3.36	5.82	160	173	42.7	5.12	18.8	15.1	64
number117	Male	79	63.5	170	21.9723	1.46	6.05	126	227	42.5	5.06	8.2	11.6	101
number118	Male	54	86.4	182.5	25.9411	2.16	6.19	155	181	44.4	5.02	17.5	32.5	93
number119	Male	54	72.9	164	27.1044	2.33	9.76	154	198	45.9	4.47	15.5	18.6	94
number120	Male	55	73.9	169	25.8744	2.35	5.82	165	154	47.6	4.83	32.2	20.1	77
number121	Male	66	86.2	174	28.4714	3.52	9.14	171	248	46.9	7.65	25.5	36.1	120
number122	Male	56	61.1	160.5	23.7187	5.28	7.45	163	202	44	4.3	19.5	28.3	86
number123	Male	44	58.6	161.5	22.4674	2.24	4.84	159	230	45.5	4.83	17.2	24	77
number124	Male	41	83.9	174.5	27.5531	3.01	7.51	166	183	46.2	4.62	11.5	15.5	68
number125	Male	58	79.2	175	25.8612	1.77	9.28	146	185	44.2	4.19	12.6	15.2	80
number126	Male	53	87.5	179	27.3088	2.55	5.88	145	150	44.7	5.07	14.8	28.4	53
number127	Female	54	64.5	159	25.5132	3.86	8.54	153	188	41.6	5.3	14.4	17.8	68
number128	Male	65	92	180.5	28.238	1.38	7.01	145	270	45.7	4.79	11.1	50	70
number129	Male	55	70.2	171.5	23.8676	3.32	6.61	142	201	46.9	4.84	11.9	14.2	70
number130	Male	38	78.1	167.5	27.8369	3.54	5.9	157	217	43.2	5.1	15.1	16	71
number131	Female	56	60.5	162	23.0529	2.96	4.1	138	222	43.4	4.81	7.6	18.2	70
number132	Male	56	55.7	166.5	20.0922	4.88	2.81	158	164	43.8	4.86	15.2	59.6	78
number133	Male	77	69.4	163	26.1207	3.83	5.85	149	240	44.4	7.44	10.9	27.3	62
number134	Male	50	66.6	168	23.5969	1.75	4.09	131	190	46.5	5.2	9	37.3	52
number135	Male	53	66	165.5	24.0962	3.46	5.99	151	201	42.5	5.11	9.7	29.2	102
number136	Male	55	65	173	21.7181	3.22	6.69	151	269	43.3	4.41	11.1	16	75
number137	Male	62	69.6	161	26.8508	4.06	4.3	144	285	45.8	4.5	11.2	46.4	69
number138	Male	55	75.7	171.5	25.7376	3.1	3.83	152	181	44.9	5.04	11	19.1	84
number139	Male	55	60.5	160.5	23.4858	2.79	7.62	147	313	42.3	4.6	11.7	16.3	53
number140	Male	81	45.2	157.5	18.2212	4.1	7.35	128	149	39.8	5.06	10.9	5.8	48
number141	Male	41	72.6	170	25.1211	3.27	3.84	141	213	43.2	4.53	20	16.1	49
number142	Male	54	73.9	166.5	26.6573	2.48	5.34	131	258	48.6	7.36	11.8	24.5	42
number143	Male	60	77.3	163	29.0941	1.92	5.65	139	252	49	6.3	10.7	26.9	53
number144	Female	74	56.4	145.5	26.6412	2.77	4.88	147	176	48.8	4.97	18.6	22	56
number145	Female	53	49	153	20.9321	3.22	4.63	136	222	44.3	5.2	7.2	13.2	69
number146	Male	52	66.7	166	24.2053	7.23	7.09	167	201	44.2	4.95	18.9	18.9	68
number147	Female	48	66.3	160	25.8984	2.02	5.38	137	236	45	4.8	11.1	11.7	63
number148	Male	46	72.6	165.5	26.5058	2.31	9.13	162	327	48.5	5.25	17.2	23.7	93
number149	Male	56	70.4	166.5	25.3948	1.71	5.67	153	266	44.1	5.58	11.2	14.9	74
number150	Male	74	78.9	173.5	26.2107	2.97	5.3	145	137	45.6	6.21	12.2	20	67
number151	Male	53	86.9	179.5	26.9706	4.09	5.62	153	175	47.6	4.87	11.6	11.3	70
number152	Male	62	63.6	169	22.2681	2.19	5.88	134	246	44.8	5.4	9.3	16	59
number153	Male	62	70.5	174	23.2858	2.63	6.27	154	198	44	4.57	20.5	31.9	36
number154	Male	68	53.4	156	21.9428	4	4.35	159	206	43.6	4.57	24.5	17.6	62
number155	Male	49	74.3	171.5	25.2616	3.67	4.21	154	211	47.1	4.6	23.4	19.6	73
number156	Male	49	75.8	170.5	26.0748	2.11	6.87	150	212	47.2	5.68	14.9	36.7	47
number157	Male	50	70.1	168	24.837	2.5	7.66	144	254	42.2	4.75	12.8	22.1	108
number158	Male	39	72.7	181	22.191	3.11	6.71	156	246	47.1	4.76	11.4	17.2	77
number159	Male	57	70.5	167	25.2788	3.19	7.16	161	192	46	4.57	13.2	20.4	64
number160	Male	48	75.7	169.5	26.3485	2.31	4.65	150	184	44.3	4.48	37.4	21.9	90
number161	Female	46	74.7	160	29.1797	4.88	5.24	121	305	42.9	4.92	11.2	15.8	55
number162	Male	59	77.4	170.5	26.6252	3.97	6.13	166	192	47.5	5.66	25.7	14.5	74
number163	Male	54	88.3	168	31.2854	2.05	7.58	161	284	45.6	4.52	9.3	44.2	143
number164	Female	62	65.3	154	27.5342	1.5	5.58	149	125	46.8	5.5	17.9	22.2	82
number165	Female	53	64.3	161	24.8061	1.99	7.32	130	239	44.3	4.84	9.1	22.1	62
number166	Female	42	61.8	160.5	23.9905	1.02	7.91	127	330	41.7	4.58	15.1	5.8	57
number167	Male	52	67	168	23.7387	2.07	6.5	148	277	46.1	5.07	22.3	31.8	107
number168	Male	49	74.9	163	28.1907	3.5	7.42	165	240	42.6	4.78	17.4	34.8	81
number169	Male	59	74.4	180	22.963	3.63	5.88	149	198	44.4	7.27	11.5	23.5	68
number170	Male	54	56.7	165	20.8264	3.84	4.98	134	277	45.9	5.33	8.8	19.8	69
number171	Male	43	74	167	26.5338	0.99	6.71	150	172	47.7	5.96	19.3	12.2	80
number172	Female	41	53.8	151.5	23.44	1.55	5.93	127	295	42.3	4.79	13.6	9.5	51
number173	Male	40	80.9	170.5	27.8291	1.69	5.72	153	226	47.2	5.37	12.9	133.9	81
number174	Male	43	73	175	23.8367	3.04	6.11	135	222	43.9	4.88	23.5	29.5	58
number175	Male	54	69	164	25.6544	2.36	4.22	140	222	45.7	4.71	13	12	52
number176	Female	50	44.4	152	19.2175	2.36	4.39	137	220	44.3	4.63	13.4	7.6	50
number177	Male	51	71.1	180.5	21.823	3.71	5.27	146	142	45.2	4.63	19.8	16.9	78
number178	Male	53	61.1	174.5	20.0655	5.03	6.18	153	185	45.8	4.86	16.5	9.6	95
number179	Male	50	67	177	21.3859	3.64	5.74	156	130	51.2	6.46	18.6	29.6	63
number180	Male	61	63.6	171	21.7503	2.2	6.63	147	135	45.4	7.07	12.1	28.1	77
number181	Male	60	83.6	180	25.8025	2.72	4.62	148	233	44.1	5.14	20.2	11.2	51
number182	Male	51	87.5	178.5	27.462	1.92	5.3	162	131	47	4.48	16.5	35.5	50
number183	Male	55	69.5	163.5	25.9986	2.51	5.17	151	196	44.4	4.92	9.8	16.4	74
number184	Male	52	83.1	159.5	32.6648	2.01	6.49	146	310	42.4	8.98	15.8	21.2	64
number185	Male	66	76	175	24.8163	2.28	7.19	149	206	43.5	5.41	19.2	18.6	101
number186	Male	56	69.6	168	24.6599	2.9	5.32	150	167	44.2	5.08	16.5	20.4	78
number187	Male	60	65.4	165.5	23.8771	4.9	5.36	143	234	43.7	5	16.2	20.6	57
number188	Male	58	72.5	162	27.6254	1.9	7.18	151	142	46.9	6.16	15.7	23.9	64
number189	Female	44	57.6	152.5	24.7675	2.64	5.62	116	238	44.8	4.73	6.7	9.1	48
number190	Male	75	68.9	171	23.5628	2.18	5.36	136	227	46.2	5.38	22.5	19.8	62
number191	Female	52	54.3	162.5	20.5633	3.48	5.49	139	184	44.5	4.61	23	10.9	48
number192	Male	53	65.4	167	23.4501	2.26	5.91	163	288	47.8	7.44	19.9	33.6	81
number193	Male	60	74.7	173.5	24.8154	2.24	6.46	161	211	50	7.95	20.7	35.9	70
number194	Female	65	68.8	157.5	27.7349	3.66	6.31	148	246	45.3	5.24	15.6	25.6	62
number195	Male	57	66.4	164.5	24.5378	4.48	4.87	151	120	46	5.35	10.2	27.2	74
number196	Female	44	59.9	158.5	23.8434	2.83	5.25	134	347	44.1	5.06	11.5	14.2	53
number197	Female	43	47.2	156	19.3951	3.11	3.71	126	168	45.7	4.74	10.3	19.6	75
number198	Male	85	64.1	164	23.8325	1.4	6.5	139	207	41.9	6.03	15.3	37.6	52
number199	Male	57	76.9	176	24.8257	4.34	5.71	151	194	46.4	4.99	19.4	41.8	56
number200	Male	40	67	168	23.7387	1.2	6.01	165	200	47.7	4.87	15.3	31.7	106
number201	Male	56	77.7	168.5	27.3666	2.75	6.98	156	165	42.2	5.03	13.3	16.2	76
number202	Male	47	63.6	159	25.1572	2.3	5.73	159	156	47.1	5	17.3	19.2	105
number203	Male	61	86.1	181	26.2812	1.31	4.7	152	186	42.1	5.65	25.6	18.2	59
number204	Male	76	62.8	167	22.5178	1.2	8.21	137	156	45.8	5.52	18.6	26.1	130
number205	Male	53	55.3	168	19.5933	2.66	5.07	133	183	43	5.08	23.4	12.1	57
number206	Male	64	67.6	172	22.8502	2.72	6.55	157	192	46.6	4.99	13.6	18	74
number207	Female	52	58.7	156	24.1206	4.1	3.91	124	188	42.8	5.48	9.7	12.9	74
number208	Female	51	47	151	20.6131	10.82	4.81	121	283	46.7	4.73	17.4	15.4	64
number209	Male	81	70.5	170.5	24.2516	2.48	7.18	132	281	40.4	5.67	13.6	30.3	56
number210	Male	80	79.3	168.5	27.9302	4.54	7.15	156	123	46.6	5.43	19.2	37.5	83
number211	Male	58	68.2	164.5	25.203	2.82	6.94	149	213	44.1	5.5	19.5	97.7	67
number212	Male	76	58.9	164	21.8992	3.62	4.81	159	153	44.4	7.63	19.9	40.4	91
number213	Male	51	75.9	183.5	22.5408	3.46	6.04	136	225	44.1	6.51	25.3	11.5	36
number214	Male	49	62.8	171.5	21.3516	1.01	3.77	161	102	46.2	5.16	15.6	23.9	88
number215	Male	70	66.2	168	23.4552	2.22	6.4	152	193	42.2	5.16	22.2	17.7	72
number216	Male	73	53.8	154.5	22.5385	3.23	5.87	141	217	43.6	5.3	23.2	20.3	56
number217	Female	44	73.1	161	28.2011	3.6	8.45	138	260	46.6	5.09	10.2	47.8	56
number218	Male	57	59	168.5	20.7803	2.74	4.38	140	279	42.3	5.22	9.8	15.5	57
number219	Male	61	72.7	165.5	26.5423	1.44	4.3	139	189	49.2	7.35	9.5	29	68
number220	Male	49	77.9	172	26.3318	2.76	6.17	149	146	45	4.81	8.5	46.5	57
number221	Male	39	56.9	163	21.4159	1.52	7.76	165	230	45.3	4.46	13	28.2	71
number222	Male	77	66.5	162	25.3391	2.69	4.83	147	135	39.7	7.24	17	15.5	77
number223	Male	84	68.8	165	25.2709	4.1	5.79	141	248	41	5.13	17.8	12.6	68
number224	Male	56	85	174	28.075	4.33	7.72	168	210	42.5	6.8	12.1	21.2	93
number225	Male	81	66.9	167	23.988	5.41	6.32	132	225	47.1	5.82	28.3	22.8	52
number226	Male	77	63.2	163	23.7871	3.31	5.8	136	180	45.7	4.95	14.5	19.4	72
number227	Male	45	66.1	168	23.4198	1.88	7.13	149	184	47.3	4.67	8.2	21.8	74
number228	Female	39	64.2	164.5	23.7248	3.12	6.31	142	222	45.1	4.83	13.5	11.5	58
number229	Male	39	58.6	160.5	22.7482	3.26	8.69	150	195	44.6	4.93	13.9	12.2	102
number230	Male	65	68	170.5	23.3916	2.65	4.1	154	274	48	5.47	29	15.8	51
number231	Male	59	87.2	163	32.8202	2.4	5.5	143	294	44.4	6.4	8.4	26.3	69
number232	Male	61	57.7	165	21.1938	3.3	8.03	160	233	43.4	5.51	11	18.3	113
number233	Male	65	67.1	160.5	26.0479	3.85	6.54	156	153	44.9	5.45	34.1	52.1	90
number234	Female	53	64.4	167	23.0915	1.69	3.62	128	268	45.5	4.45	11.8	11	51
number235	Male	58	64.1	161.5	24.5761	2.13	5.69	159	165	46.1	4.78	24.3	24.2	88
number236	Male	53	69.8	161.5	26.7615	2.46	4.36	163	180	45.4	5.22	15.5	15.1	66
number237	Male	49	69.5	161.5	26.6465	1.32	5.95	153	256	44.9	5.47	18.6	20.2	86
number238	Male	62	71.6	167.5	25.5202	3.96	7.99	142	317	45	7.3	13.6	18.8	49
number239	Male	63	70.9	162.5	26.8497	3.51	7.58	147	191	45.9	5.99	17.5	11	63
number240	Male	54	81	170.5	27.8635	3.19	5.55	149	213	48.9	6.05	16	47.8	54
number241	Male	80	67	166	24.3141	1.25	5.76	141	167	44	7.46	17.2	24.5	69
number242	Male	47	73.7	171.5	25.0576	2.57	11.56	156	274	45.5	4.29	25.1	39.7	101
number243	Male	53	71.5	179.5	22.191	2.36	6.99	158	177	48.2	4.51	15.6	29.9	57
number244	Male	51	62.3	166	22.6085	1.68	5.06	149	181	44	8.92	20.1	44.6	72
number245	Male	57	66.1	169	23.1434	2.15	3.83	132	176	42.1	4.02	14.7	25.3	92
number246	Male	62	78.6	167.5	28.0151	2.22	5.18	161	170	46.7	7.58	25.2	22.4	61
number247	Male	53	67.5	161	26.0407	1.67	5.52	152	165	45.8	4.54	9.5	21.7	99
number248	Male	47	61.7	165	22.663	1.32	4.13	162	225	44.6	5.03	13.6	16.8	94
number249	Male	55	86.1	175	28.1143	2.27	6.92	148	267	41.2	5.09	16.5	23.2	49
number250	Male	53	64.2	168.5	22.6118	1.76	7.45	152	170	46.1	5.29	19.7	7.4	79
number251	Male	54	83.5	175.5	27.1102	3.63	6.17	158	218	44.2	4.47	11	42.7	78
number252	Female	55	57.4	166	20.8303	2.58	6.71	128	234	40.9	4.71	10.7	13.4	63
number253	Male	56	80.4	170.5	27.6571	3.86	8.08	149	211	41.9	4.96	26.1	15.7	52
number254	Female	56	55.8	170.5	19.1949	1.79	5.49	123	236	43.1	3.99	11.2	25.7	98
number255	Male	76	48.8	163	18.3673	2.71	3.34	146	98	46.9	6.74	13.2	16.7	61
number256	Male	56	80.2	165	29.4582	3.13	4.98	156	209	46.6	5.43	9.6	20.4	62
number257	Male	56	67.3	168.5	23.7037	2.64	5.9	138	272	45.4	6.01	20	8.3	56
number258	Male	72	69.1	175.5	22.4349	4.78	5.49	156	161	45.3	5.86	17.2	9.9	63
number259	Female	49	57.5	158.5	22.8881	4.69	6.46	138	242	42.8	4.57	16.8	15.2	53
number260	Male	46	83.7	170.5	28.7923	3.36	8.12	164	233	43.5	5.39	12.6	68.4	42
number261	Male	48	75.6	174	24.9703	1.77	5.23	163	218	45.3	5.02	22.5	20.5	52
number262	Male	45	70.7	166	25.6568	20.24	9.08	155	238	43.2	5.23	6.7	11.3	85
number263	Male	54	61.8	161.5	23.6943	2.57	6.6	144	226	44.9	5.59	9.8	34.3	70
number264	Female	54	55.3	154.5	23.1669	1.88	4.76	126	176	43.8	5.61	11.3	16.1	110
number265	Female	53	49.7	149	22.3864	2.46	6.79	132	178	42.6	5.13	13.2	20.8	92
number266	Male	62	70.6	171	24.1442	1.65	5.6	141	194	45.4	5.2	17.6	8.5	76
number267	Female	55	71.5	172	24.1685	4.28	4.51	140	228	48.6	4.89	16.2	14.9	61
number268	Male	54	65.9	165.5	24.0597	2.93	5.43	163	208	41.8	5.29	27	32.8	71
number269	Male	50	76.1	172	25.7234	2.08	7.17	162	242	46.8	5.53	35.5	37.7	75
number270	Male	60	81.5	167.5	29.0488	2.39	8.65	143	208	42.9	5.23	14.1	21.7	44
number271	Female	54	68.1	156.5	27.8047	4.6	7.16	145	285	45.3	5.89	10.9	62	75
number272	Male	53	64.9	163.5	24.2778	6.71	7.92	151	264	44.9	5.19	16.3	22.1	58
number273	Male	41	56.5	162	21.5287	2.51	5.53	148	202	44.7	4.58	14.8	16.6	75
number274	Male	55	75.4	165	27.6951	2.61	6.62	147	216	43.4	6.36	30.9	38.4	70
number275	Male	52	70.3	173	23.4889	1.64	4.03	152	125	45.4	4.83	38.5	19.6	92
number276	Male	58	63	165.5	23.0009	3.66	4.83	156	196	43.5	5.35	17.1	18.3	42
number277	Female	56	63.3	165	23.2507	3.17	5.83	141	241	43.8	5.02	13.1	15	103
number278	Male	43	63.7	165.5	23.2565	10.32	4.92	143	264	45	5.13	12.7	9.6	81
number279	Male	75	70	170	24.2215	2.27	9.83	122	144	43	5.54	11.9	19.2	67
number280	Male	61	63	167	22.5896	1.25	7.03	153	186	43.3	5.03	14.3	26.1	89
number281	Male	42	57	163	21.4536	2.12	5.95	133	305	46.9	4.85	16.1	29.6	103
number282	Male	56	84.1	177.5	26.6931	1.18	6.55	174	214	45.4	5.08	12.3	32.6	85
number283	Male	56	69.5	164.5	25.6834	1.93	5.82	158	172	47.1	5.24	15.3	17.8	72
number284	Male	36	74.6	171.5	25.3636	1.57	6.81	163	208	47.1	4.68	22.1	30.2	126
number285	Male	48	62.8	169	21.988	2.9	5.3	166	174	48.3	5.76	16.7	17.6	86
number286	Male	55	79.4	167.5	28.3003	4.54	6.02	138	200	45.1	4.74	16.8	17.9	71
number287	Female	47	57.9	164	21.5274	2.12	5.18	144	225	45.3	4.76	9.7	8.7	55
number288	Male	39	82.8	178.5	25.9869	4.87	6.16	153	294	43.9	5.23	11.3	23.7	81
number289	Male	68	70.6	168.5	24.8659	3.67	4.82	142	245	43.4	5.03	11.6	19	46
number290	Female	54	55.1	157.5	22.2121	1.1	5.91	127	282	43.8	5.18	9.5	8.4	72
number291	Female	52	50.9	159	20.1337	2.25	4.41	137	296	45.7	5.25	25.5	10.2	55
number292	Male	54	51.7	158	20.7098	2.74	5.19	151	175	44	5.14	20.2	13.2	70
number293	Male	62	80.6	174.5	26.4694	2.57	5.9	152	245	45.1	5.92	20.6	17.5	89
number294	Male	64	76.1	174.5	24.9916	2.94	7	150	261	41.8	5.36	12.5	23.9	74
number295	Male	40	66.1	161.5	25.3429	1.84	6.57	148	182	50.3	5.47	26.5	13.4	39
number296	Male	79	57.8	161.5	22.1607	1.71	5.91	132	242	40.8	11.3	12.2	12.5	102
number297	Male	84	70.5	165	25.8953	5.07	5.08	139	146	45.9	6.83	10.8	21.7	89
number298	Male	39	80.8	175	26.3837	2.37	6.5	145	261	46.4	6.25	12.7	37.9	72
number299	Female	53	69.8	159	27.6097	1.6	5.84	138	236	47.1	4.99	12.2	27.9	68
number300	Female	53	67.6	160.5	26.242	3.04	5.39	147	231	59.9	5.87	10	41.2	77
number301	Male	52	70.5	169	24.684	3.9	6.34	157	263	46.6	4.77	10.7	11.9	84
number302	Male	41	61.1	166.5	22.0401	4.99	5.65	156	216	47.6	4.66	14	17.3	91
number303	Male	42	63.3	162	24.1198	2.86	10.88	138	292	43.8	4.65	15	16.3	112
number304	Male	41	64.4	162	24.5389	2.05	6.46	146	299	48.2	5.06	9.2	15.6	79
number305	Female	57	72.9	165.5	26.6153	2.99	4.18	127	147	41.6	5.19	16.1	28.1	99
number306	Male	71	71.4	166	25.9109	3.03	5.71	153	218	46.1	5.05	11.8	12	91
number307	Male	57	69.1	164	25.6916	3.58	5.11	151	260	46.4	5.37	12.1	16.3	64
number308	Male	44	78.1	175.5	25.3569	4.8	7.93	154	177	46.5	4.59	14.8	20.3	66
number309	Female	44	47.8	147.5	21.9707	1.97	7.06	143	248	46.6	5.67	7.5	13.2	67
number310	Male	46	79.5	170	27.5087	2.26	7.76	181	177	43.2	5.58	15.3	14.8	70
number311	Male	43	59.1	162	22.5194	1.99	5.89	149	193	46.4	5.28	31.2	17.8	51
number312	Male	43	89.4	178	28.2161	2.04	5.29	156	188	46.1	4.54	12.5	22.2	83
number313	Male	47	58.3	166.5	21.03	5.41	5.89	158	212	47.5	5.42	13.5	46.6	82
number314	Male	38	100.1	177	31.9512	4.25	6.68	160	220	46.5	5.43	15.7	122.5	76
number315	Male	54	73.4	165	26.9605	3.13	4.87	146	175	45.5	5.66	15.1	19.4	70
number316	Male	52	74.8	166.5	26.9819	2.02	5.83	160	208	49.5	4.7	21.6	22	46
number317	Male	62	69.5	174.5	22.8241	2.14	6.34	148	329	48.6	8.53	20.7	20.5	61
number318	Male	52	59	154.5	24.717	2.17	5.65	149	236	46.7	4.81	21.6	31.1	60
number319	Female	53	66.7	162	25.4153	1.92	4.56	136	191	45.6	5.02	13.9	10.9	71
number320	Female	56	51.8	163	19.4964	3.24	4.69	143	182	48.6	4.69	13.8	14.6	79
number321	Male	40	78.1	167.5	27.8369	3.15	7.74	152	242	46	4.89	12.9	25.8	99
number322	Male	39	63.6	166.5	22.9419	3.72	8.34	155	236	43.9	4.82	18.8	15.4	68
number323	Male	51	70	168	24.8016	1.35	7.61	164	155	45.5	5.29	23.7	15.2	72
number324	Male	60	61.1	161	23.5716	2.3	6.27	155	214	47.3	4.84	19.2	32.8	62
number325	Male	59	72	169	25.2092	3	7.14	160	261	46.3	7.33	11	27.4	84
number326	Male	38	65.7	185	19.1965	4.64	4.77	146	166	43.8	4.66	21.4	15.8	66
number327	Male	56	73.9	175.5	23.9933	3.44	6.31	159	244	45.6	5.12	15	13.7	79
number328	Female	42	43.5	142	21.5731	1.87	8.58	132	268	41	4.41	11.1	5.6	57
number329	Male	38	66.3	177.5	21.0434	2.1	6.92	152	264	46.4	4.42	12.3	12	65
number330	Male	47	78.8	174	26.0272	3.03	5	153	194	46	5.32	13.3	58.5	69
number331	Male	49	79.3	170	27.4394	1.95	4.17	145	173	47.8	8.18	16.1	13.3	81
number332	Female	53	69.2	163	26.0454	1.87	5.2	139	239	45.8	4.65	14.7	19.4	84
number333	Male	62	61.4	161	23.6874	4.46	6.99	144	255	44.3	5.63	13.7	18.4	78
number334	Male	42	54.2	165.5	19.7881	1.85	5.73	157	200	48.1	4.69	15	18.1	79
number335	Male	54	61.5	157.5	24.7921	2.29	6.67	152	220	44.3	4.88	16.4	38.6	82
number336	Female	54	60	169.5	20.8839	1.59	6.4	131	246	45.6	4.91	8.2	19.6	73
number337	Male	51	69.4	169.5	24.1557	3.24	6.67	164	250	42.5	4.63	6.9	17.5	76
number338	Male	60	81.7	176	26.3753	2.15	8.78	155	236	42.6	5.22	11.8	34.9	61
number339	Male	50	78	173	26.0617	2.13	8.06	153	195	47.1	4.81	13.7	21	77
number340	Male	56	69	165.5	25.1914	3.18	3.55	159	86	46.4	5.27	15.1	30	85
number341	Male	40	73.1	174.5	24.0064	3.19	6.91	153	241	48.1	4.53	10.9	47.7	51
number342	Male	79	81.2	170.5	27.9323	2.49	5.98	136	196	44.1	5.88	15.7	26.7	65
number343	Male	38	68.5	173	22.8875	2.62	5.55	146	239	47.7	4.77	16.2	6.1	74
number344	Female	46	52.4	161	20.2153	1.65	4.83	142	259	42.3	5.2	8.7	13.5	82
number345	Male	40	74	171	25.3069	1.9	6.05	144	274	47.2	4.94	12.9	22.1	69
number346	Male	42	84.4	173	28.2001	2.63	8.62	163	303	46.3	4.73	13.5	43.9	84
number347	Male	45	78.6	176	25.3745	5.92	6.82	153	205	44.4	4.85	16.5	24.6	76
number348	Male	44	85.3	177.5	27.074	2.99	6.34	150	192	47.7	5.08	17.2	16.3	46
number349	Male	79	80.3	168.5	28.2824	2.28	7.41	159	181	41.6	6.13	16.6	27.8	56
number350	Male	41	59.7	172	20.1798	1.58	5.32	167	169	43.1	4.87	25.9	34.5	49
number351	Male	40	56.1	167	20.1155	1.59	6.95	147	229	43	4.73	8.1	17.5	77
number352	Male	55	73.7	170	25.5017	2.59	7.19	167	181	44.3	5.09	13.7	16.9	79
number353	Male	37	70.8	178.5	22.2207	3.91	6.4	147	275	46.1	5.19	15.4	12.5	89
number354	Male	48	72.4	164.5	26.7551	2.46	7.4	168	202	43.4	4.77	20.5	14.6	66
number355	Female	46	49.1	160.5	19.0604	2.81	5.2	136	185	44.3	4.55	13.3	7	50
number356	Male	72	65.6	166	23.8061	2.07	5.92	135	196	42.4	4.87	10.5	17.3	72
number357	Male	45	77.3	170	26.7474	3.46	9.15	136	453	39.7	5.48	7.6	15.9	92
number358	Male	39	56.8	170	19.654	1.13	5.02	147	233	44.7	5.12	13.7	23.2	52
number359	Male	42	77.1	174	25.4657	1.86	5.98	170	250	46.6	4.81	19.5	72.9	72
number360	Male	53	80.8	172.5	27.154	2.62	6.39	163	203	44.9	5.39	20.8	17.6	46
number361	Male	33	83.2	162	31.7025	1.99	7.09	149	219	44.9	4.73	23.7	65.9	74
number362	Male	40	75.2	167	26.964	2.55	6.57	155	225	46.3	5.12	18.7	53.5	106
number363	Female	42	55.9	155.5	23.118	1.95	5.91	128	270	43.3	4.87	8.6	9.8	59
number364	Male	34	80.4	172.5	27.0195	3.63	8.58	161	304	45.6	4.62	22	20	80
number365	Male	50	73.3	169.5	25.5132	2.75	6.34	149	309	44.9	6.07	12.5	25.3	63
number366	Male	32	76	171.5	25.8396	2.84	7.16	150	184	44.6	5.11	15.7	17.2	78
number367	Male	37	84.5	176.5	27.1248	4.11	6.53	159	175	44.4	4.68	13.2	55.7	81
number368	Male	45	63	172	21.2953	3.13	5.93	144	268	48	5.6	18.2	19.8	62
number369	Male	59	90.3	180.5	27.7162	1.66	6.93	158	159	45.7	4.62	42.6	33.7	52
number370	Male	51	80.7	165	29.6419	3.48	7.61	130	343	44.1	4.35	7.8	52.8	83
number371	Male	59	64.8	161.5	24.8445	2.29	7.08	150	201	44.7	5.13	22.3	43.8	78
number372	Male	38	65.6	165.5	23.9501	2.05	7.24	154	229	45.8	4.67	16.4	10.8	63
number373	Male	49	70.6	173.5	23.4534	3.94	7.8	160	285	47.1	4.98	16.1	23.3	55
number374	Male	52	72.3	166	26.2375	3.86	7.98	158	268	44.6	4.84	15.9	18	61
number375	Male	56	74	167	26.5338	2.49	5.29	151	272	45.6	4.22	5.9	22.5	96
number376	Male	50	67.7	166	24.5682	6.16	6.27	166	228	48.3	5.01	13.2	16.8	82
number377	Female	62	64.1	163.5	23.9785	2.75	6.91	142	289	49.1	4.85	12.1	13.9	96
number378	Female	58	89.6	170.5	30.8219	1.93	5.82	158	248	45.5	4.73	20.4	80.7	144
number379	Male	60	78.2	173	26.1285	3.93	5.72	154	278	44	4.76	11.8	11.8	58
number380	Male	54	79.2	170	27.4048	5.27	9.62	159	267	41.4	4.41	10	15.6	66
number381	Male	37	73	164.5	26.9768	2.02	7.8	146	171	45.8	4.9	16.4	15.9	72
number382	Female	48	55.6	160	21.7187	3.38	6.73	132	256	44.2	4.64	17.4	6.7	53
number383	Male	56	81.6	164.5	30.1549	4.43	8.04	149	179	43.1	4.78	12.9	12	86
number384	Male	51	82.6	187.5	23.4951	4.35	5.27	161	259	46.4	4.41	14.1	24.8	56
number385	Male	54	82.7	163.5	30.9364	1.6	4.42	143	195	45.8	5.5	25.3	51.4	69
number386	Male	38	70.4	168.5	24.7955	5.57	5.93	142	191	45.4	4.94	9.9	12.9	82
number387	Male	55	69.4	170.5	23.8732	2.73	5.29	148	158	43	5.13	22.4	19.1	68
number388	Male	55	70.9	171	24.2468	2.78	6.94	152	312	46	4.8	11.5	12.5	76
number389	Male	55	68.5	172.5	23.0204	1.79	6.69	150	197	47.6	4.23	9.3	14.5	52
number390	Male	53	72	164.5	26.6073	2.34	8.06	157	200	47.4	9.17	7.9	14.5	73
number391	Male	54	65.4	168	23.1718	3.42	9.39	142	320	43.5	4.65	14.5	26.7	65
number392	Male	75	61	164.5	22.5423	3.73	5.61	149	302	44.7	5.3	23.2	14.4	82
number393	Male	79	49.2	164.5	18.1817	2.92	5.35	139	133	47.1	5.52	22	16.9	68
number394	Male	54	72.6	167.5	25.8766	3.51	4.73	145	264	46.1	6.76	12.2	13.6	60
number395	Male	44	62	169.5	21.58	6.5	6.15	147	244	50.1	4.96	10.6	16.2	64
number396	Male	39	75.7	181.5	22.9796	3.61	5.51	159	231	48.9	4.74	34.9	13.3	62
number397	Female	52	58	156	23.833	3.26	5.55	129	261	43.1	5.74	11.9	35.7	96
number398	Female	40	52.4	152.5	22.5316	1.77	5.43	137	297	47.6	5	15.8	29.8	56
number399	Male	59	68.1	162	25.9488	4.04	5.14	155	163	45.2	4.26	20.6	31.2	72
number400	Female	39	55.8	154	23.5284	1.84	6.34	130	239	46	5.22	11.9	11.4	49
number401	Male	65	73.4	178	23.1663	1.49	6.8	152	200	46.9	5.05	16	25.8	67
number402	Male	45	71	166	25.7657	1.15	4.4	149	174	47.2	5.17	13.1	34.7	72
number403	Male	44	76.9	173.5	25.5463	3.58	4.09	152	219	44.4	4.51	17.8	28.6	70
number404	Male	52	64	156	26.2985	2.09	7.77	140	320	46.5	4.6	13.1	32.6	51
number405	Male	57	84.7	175	27.6571	2.95	7.76	161	268	38.6	10.61	26	20.3	96
number406	Female	55	54.7	149.5	24.474	4.16	5.86	140	307	45.4	5.17	9.7	22.9	99
number407	Female	36	52.5	153	22.4273	4.93	7.64	133	284	45.6	4.6	8.1	9.8	60
number408	Male	43	67.3	169.5	23.4248	3.24	5.28	146	269	45.2	6.12	7.8	20	66
number409	Female	35	50.6	160	19.7656	3.25	6.19	124	347	42.7	4.64	9.1	12.7	61
number410	Male	55	72.5	169.5	25.2347	3.02	5.22	153	207	43	4.56	12.1	25.5	69
number411	Male	52	73.9	170.5	25.4212	3.22	6.53	157	185	40.8	5.3	29.6	15.5	82
number412	Male	48	74.7	177	23.8437	2.12	8.98	160	174	44.4	4.73	7.5	27.4	104
number413	Female	46	54.8	157.5	22.0912	2.07	5.04	127	238	41.2	4.5	15.6	12.4	61
number414	Male	78	64	165.5	23.366	3.26	6.23	147	266	42.8	5.24	16.3	10	37
number415	Female	61	53.1	156.5	21.6803	3.08	5.94	144	242	46.5	6.06	18.4	36.2	93
number416	Female	41	55.7	155	23.1842	3.99	7.57	136	217	42.8	4.64	13.3	10.3	87
number417	Female	42	50.5	156	20.7512	6.36	5.1	136	205	45	5.14	14	23.4	48
number418	Male	60	70	172.5	23.5245	4.18	8.36	150	190	48.3	5.65	9.5	14.2	86
number419	Male	73	66.7	166.5	24.0601	2.73	6.75	151	196	44.1	9.44	15.3	30.3	57
number420	Male	62	93	184	27.4693	4.4	7.14	146	197	41.3	6.56	27.4	39.5	66
number421	Male	57	61.1	169.5	21.2668	3.76	5.69	146	270	44.8	6.26	18.5	16.7	119
number422	Male	50	84.4	175.5	27.4024	2.2	6.38	166	194	41.3	8.31	24.9	27.5	73
number423	Male	58	62	170	21.4533	1.97	5.42	162	148	43.4	4.89	16	18.2	96
number424	Male	51	86.2	179	26.903	2.02	6.59	152	239	45.5	4.64	23.8	25.1	63
number425	Male	48	70	165	25.7117	2.43	5.85	142	321	46.2	5.11	9.2	8	65
number426	Male	62	73.9	170	25.5709	1.24	3.78	132	226	42.6	5.01	22	34.8	298
number427	Male	55	65.7	162.5	24.8805	2.02	7.58	152	220	49.1	5.42	20.9	21.4	97
number428	Male	56	83	174	27.4145	2.2	8.04	151	269	45.2	4.8	13.8	31.9	57
number429	Male	57	83.4	172.5	28.0277	6.34	6.67	165	242	44.2	5	31.3	31.4	81
number430	Male	48	65.4	165	24.022	6.78	4.39	162	180	44.9	5.33	14.2	14.8	74
number431	Male	48	55.5	163.5	20.7614	3.92	6.07	153	275	46.2	4.43	57.8	31.8	80
number432	Male	55	75.8	170	26.2284	4.98	5.81	151	178	45.7	6.04	27.7	20.6	49
number433	Male	53	69.9	172.5	23.4909	2.8	5.54	151	193	43.3	4.05	13.9	13.7	88
number434	Male	61	80.3	167.5	28.6211	4.32	5.95	153	256	41.5	4.46	17.4	14.8	93
number435	Male	76	80.1	165	29.4215	3.56	4.07	153	149	40.6	4.62	20	17.7	74
number436	Male	64	76.9	174	25.3997	3.19	6.77	154	246	42	4.71	14	23.9	71
number437	Male	80	62.1	165.5	22.6723	1.89	3.41	129	177	42	5.05	10	19.3	78
number438	Male	76	60	161	23.1473	4.25	5.8	145	138	43	5.21	21.7	26.3	85
number439	Male	84	77.4	168.5	27.261	2.77	7.06	136	212	45.8	6.3	16.7	13.9	62
number440	Male	74	62.2	152.5	26.7455	2.18	7.78	156	203	44.7	6.01	15	33.3	83
number441	Male	85	72.7	169.5	25.3043	2.25	5.66	158	210	43.9	6.16	15	17.5	44
number442	Male	93	84.8	181.5	25.742	1.41	6.6	127	274	37	5	16.3	21.7	72
number443	Male	63	59.2	163.5	22.1455	4.62	4.24	153	176	42.3	5.07	27.6	15.4	50
number444	Male	71	82	169	28.7105	3.62	5.61	141	203	43	5.77	14.2	29.6	80
number445	Male	61	53.1	167	19.0398	2.15	4.28	157	130	43.6	5.16	20.2	20.8	87
number446	Male	64	69.6	165	25.5647	3.42	7.97	153	238	43.4	8.44	14.4	20.5	84
number447	Male	61	76.4	173.5	25.3802	4.62	5.37	154	282	44.3	5.01	13.1	23.3	57
number448	Male	57	82.1	172	27.7515	2.34	5.36	146	296	47.9	7.03	14.7	20.4	79
number449	Male	47	66.8	173.5	22.191	6.06	4.77	157	247	47.2	4.67	26.1	15.6	76
number450	Male	57	59.8	166.5	21.5711	5.96	12.36	150	342	42.7	5.35	15.8	18.3	78
number451	Female	88	67.9	153.5	28.8173	2.65	5.22	152	197	46.9	6.14	2.7	16.7	109
number452	Male	57	61	165.5	22.2707	4.04	7.09	147	179	39.3	5.14	13.8	24	67
number453	Female	53	58.2	163	21.9052	3.12	4.05	134	190	44.1	4.95	10.6	16.9	47
number454	Male	67	61.6	158.5	24.5201	1.19	6.18	150	261	43.4	4.5	14.2	27.5	125
number455	Female	53	59.4	164	22.0851	0.98	6.28	139	197	44.2	4.88	12.1	18.2	106
number456	Male	92	70.8	160	27.6562	2.53	6.91	121	184	33.9	5.1	7.8	19.1	75
number457	Female	82	50.8	148.5	23.0362	1.99	4.77	129	189	40.4	7.59	12.4	10.8	64
number458	Male	49	63.8	170	22.0761	3.19	5.95	161	223	42.9	5.73	11.2	11.8	89
number459	Male	91	46.3	157	18.7837	3.03	3.66	114	143	39.9	4.47	14.9	19	58
number460	Female	57	45.6	150.5	20.1322	1.4	6.9	145	292	45.8	4.65	14	24.9	103
number461	Male	58	67.6	166	24.5319	2.76	8.24	138	237	46.2	5.99	13.9	12.5	80
number462	Male	54	72.2	176	23.3084	2.16	6.98	153	336	46.6	5.71	20.4	26.8	72
number463	Female	54	55.1	150.5	24.3264	3.73	5.57	137	160	44.7	4.07	12.3	67.1	74
number464	Male	55	62.1	160	24.2578	3.97	4.94	164	188	44.8	4.24	16.1	29.6	80
number465	Male	39	66	170.5	22.7036	3.5	6.75	153	272	47.9	4.69	17.1	15.4	66
number466	Male	63	86.4	170.5	29.7211	2.53	6.46	152	188	45.9	5.12	14.9	18.7	42
number467	Male	68	49.3	156.5	20.1288	4.01	8.15	150	138	45.3	4.91	20	18.4	96
number468	Male	56	81	173	27.0641	5.92	7.84	136	174	46.9	5.98	11.1	36	111
number469	Male	54	76.1	169	26.6447	2.59	5.23	151	161	45.9	5.33	18.2	34.3	96
number470	Male	56	63.5	165.5	23.1834	1.63	5.12	144	178	41.2	5.06	15.2	13.2	78
number471	Male	61	56.8	164.5	20.9902	1.6	4.2	136	220	41.8	7.06	7.8	16.7	78
number472	Male	41	69.6	163.5	26.036	2.46	3.92	164	149	45.3	5.45	18.2	14.3	76
number473	Male	44	66.3	168	23.4906	2.76	5.07	166	185	47.3	5.49	16.3	50.4	88
number474	Female	55	56.1	161.5	21.5089	2.9	5.48	131	227	45.1	5.7	15.6	20.3	82
number475	Female	55	53	157	21.5019	2.17	6.46	142	207	40.8	5.01	17.5	15.4	65
number476	Male	51	70.7	172.5	23.7597	1.94	7.55	161	186	45.7	5.42	31.1	22.7	87
number477	Male	57	68.2	161	26.3107	1.38	3.87	143	199	42.8	6.11	16.4	25.9	79
number478	Male	65	95.4	176	30.798	1.89	5.11	142	148	46.1	7.87	28.2	40.8	74
number479	Female	63	46.6	156	19.1486	4.38	5.74	118	281	45.2	9.04	10.1	12	86
number480	Male	54	78.4	160.5	30.4345	2.43	5.85	149	144	44.2	4.27	7.6	39.6	66
number481	Male	50	80.2	173	26.7968	2.87	7.11	147	184	42.9	4.67	17.6	46.9	64
number482	Male	56	69.2	163.5	25.8863	2.79	5.59	155	214	46.1	4.48	10	17.9	90
number483	Female	49	51.8	157.5	20.8818	5.17	5.43	137	221	47.4	4.89	7.4	19.8	105
number484	Male	56	74.2	171.5	25.2276	3.72	7.16	142	208	43.7	5.34	10.1	39.8	79
number485	Male	47	56.9	164.5	21.0272	2.81	6.98	160	212	45.1	4.57	12.7	22.5	163
number486	Male	57	61.1	168.5	21.52	1.93	9.37	145	251	48.1	8.4	14.4	11.6	65
number487	Male	46	81.9	171	28.0086	1.58	5.94	151	241	45.1	4.77	20.4	41.1	92
number488	Male	67	66	175.5	21.4284	3.55	5.6	138	184	44	4.82	13.4	8.4	64
number489	Male	63	76.7	169	26.8548	2.12	5.75	172	190	48.2	6.92	28.3	22.3	74
number490	Female	55	54	160.5	20.9625	7.45	3.89	122	189	44.4	5.36	6.8	15.8	100
number491	Male	57	64.7	155.5	26.7574	2.98	4.61	144	249	46.6	6.79	18.2	24.4	89
number492	Male	46	77	168.5	27.1201	1.38	6.15	147	301	46.2	4.82	13.5	27.5	67
number493	Male	45	74.3	171.5	25.2616	1.47	4.57	158	217	45.5	4.55	19.4	15.9	71
number494	Male	52	72	160	28.125	4.56	6.47	147	236	43.4	4.87	10.9	51.7	37
number495	Male	52	84.5	178.5	26.5204	1.88	5.86	138	220	42.7	4.37	13.3	33.3	76
number496	Female	40	58.3	154.5	24.4237	2.12	5.8	131	236	43.8	5.5	10.2	10	53
number497	Female	42	56.9	149	25.6295	1.34	6.33	131	193	44.1	4.41	25.8	13.2	82
number498	Male	55	62	164	23.0518	2.52	6.4	152	202	42.7	5.03	18	40.7	82
number499	Female	50	62.3	162.5	23.5929	2.16	4.13	150	194	46.2	4.38	16.4	11.4	57
number500	Male	50	63.1	160.5	24.4951	2.97	6.86	130	239	45.2	4.69	14.4	12.3	57
number501	Male	39	67.5	171	23.084	1.99	4.2	147	188	46.5	5.23	13.6	17.3	60
number502	Male	58	64.1	159	25.355	2.11	6.39	156	206	41.6	4.55	13.3	16.5	85
number503	Male	37	72.5	170	25.0865	2.43	4.96	157	249	43.9	4.6	22.6	46.6	83
number504	Male	57	拒绝	拒绝	#VALUE!	2.59	7.15	162	174	44.9	5.03	20.2	50.9	99
number505	Male	41	67	175.5	21.7531	6.44	4.69	143	187	44.8	4.66	13.7	21.4	88
number506	Male	57	62.9	164	23.3864	5.45	6.65	144	273	45.1	4.67	18.9	22	63
number507	Male	65	55	161.5	21.0871	2.64	5.08	151	168	43.8	4.94	21.5	15.4	70
number508	Male	49	72.5	164.3	26.8573	2.61	6.5	155	180	46.4	5.17	18.5	17.1	100
number509	Male	56	77.2	172	26.0952	4.01	4.84	145	205	44.9	5.03	11.4	23.3	85
number510	Male	54	69.4	180	21.4198	2.7	7.5	157	190	46.7	5.28	12.9	32.6	68
number511	Female	57	60.8	162.5	23.0249	2.73	4.49	135	222	42	5.22	10.9	22.1	53
number512	Male	71	75.2	178	23.7344	4.11	6.44	143	212	43.2	6.04	17.8	14	93
number513	Male	51	70.6	166	25.6206	6.03	5.03	163	106	42.7	6.81	28.1	37.3	61
number514	Male	59	80.3	174	26.5227	1.67	11.39	146	196	43.1	4.41	12.1	13.1	90
number515	Female	55	66.9	160	26.1328	4.05	8.83	151	207	41.9	5.09	11.9	30	88
number516	Male	58	69.7	168	24.6953	3.67	7.43	162	190	45	4.63	16.2	21.5	74
number517	Male	49	79.2	170	27.4048	2.01	5.36	151	222	42.6	4.72	24.8	18.7	91
number518	Male	69	54.2	157.5	21.8493	4.27	4.93	150	190	43.3	4.82	24	37.7	72
number519	Male	80	61	169	21.3578	1.63	6.61	125	188	41.5	4.8	11.5	12.3	113
number520	Male	55	81.1	171.5	27.5735	3.36	5.96	148	214	47.7	6.85	14.1	70.1	56
number521	Male	62	62.2	171	21.2715	2.01	6.53	143	147	42.7	6.71	15.5	30.4	88
number522	Male	54	89.2	179.5	27.6845	3.21	5.96	145	203	43.2	4.18	19.8	10.7	73
number523	Female	54	48.9	153	20.8894	3.22	5.42	134	218	45	4.74	9.2	13.8	98
number524	Female	52	47.6	151	20.8763	9.63	5.14	125	340	45	4.67	9.9	16.8	89
number525	Female	65	55.9	157	22.6784	1.64	3.24	126	165	40.3	6.51	10.2	12.6	82
number526	Male	59	63.7	161	24.5747	2.64	6.5	168	167	46	4.83	29.8	20.2	77
number527	Male	53	69.4	166	25.1851	6.61	8.5	164	222	41.9	4.8	26.5	23	88
number528	Male	68	68.5	167	24.5617	2.77	6.23	152	156	44.8	5.8	16.7	22	62
number529	Male	49	71.9	171.5	24.4456	3.1	9.29	151	258	45.5	4.96	24.8	19.6	69
number530	Male	45	56.2	161.5	21.5472	2.02	6.76	159	281	48.4	4.9	20.4	23	87
number531	Male	63	66.8	164	24.8364	4.15	4.61	146	235	46.7	4.63	10.4	41.2	95
number532	Male	54	86.8	179.5	26.9396	2.59	5.38	143	156	43.8	4.52	15	30.8	59
number533	Male	38	72.8	164.5	26.9029	1.95	7.59	149	182	44.9	5.58	21.5	16.3	85
number534	Male	39	73.1	166	26.5278	2.68	6.89	152	222	48.6	5.16	12.4	29.3	113
number535	Male	54	67.8	166.5	24.4569	4.01	6.75	148	217	38.6	5.36	11.8	23.4	88
number536	Male	63	70.7	175.5	22.9544	3.02	7.31	148	194	41.1	4.14	20.6	25.9	42
number537	Male	61	79.9	163	30.0726	1.83	5.57	132	214	46.5	5.97	13.4	28.9	68
number538	Male	42	87.2	173.5	28.9679	2.66	7.99	152	180	44.2	5.21	11.4	46	76
number539	Male	47	72.2	166	26.2012	2.38	10.18	164	290	46.5	5.42	14.8	20.7	106
number540	Female	56	76.1	173.5	25.2805	4.38	4.81	138	270	45.6	5.2	12.9	17.5	51
number541	Male	56	95.7	178	30.2045	3.88	7.84	146	277	44.6	8.12	14	56.1	66
number542	Female	55	52.2	157.5	21.0431	1.35	6.5	127	268	45.3	5.26	10	11.5	100
number543	Male	63	71.5	174.5	23.4809	2.94	4.79	145	320	50.3	11.64	17.7	23.4	61
number544	Male	48	65.1	158.5	25.9133	2.46	6.14	157	159	44.2	4.16	21.5	16	108
number545	Female	47	54.8	157.5	22.0912	2.41	4.23	122	222	41.3	4.42	13.8	10.3	55
number546	Male	56	69.2	170.5	23.8044	3.16	5.33	146	168	44.2	5.4	24.8	21	68
number547	Male	44	66.7	166.5	24.0601	10.07	3.99	139	261	42.7	5.26	13.9	12.6	81
number548	Female	43	63.6	161	24.5361	1.06	9.59	123	353	41.2	4.25	13	14.3	59
number549	Female	47	75.3	159.5	29.5988	3.78	4.21	107	283	43.6	5.27	15.9	18	53
number550	Female	62	59.3	161.5	22.7358	2.08	8.48	146	308	44.8	5.16	12.1	24.8	95
number551	Male	73	70.1	176	22.6304	4.95	4.57	159	148	42.7	6.33	18.9	10.5	52
number552	Male	55	86	185.5	24.9926	2.14	7.37	159	164	44.2	5.3	18.9	27.5	115
number553	Male	55	55.7	160.5	21.6225	3.16	4.91	151	162	40.8	4.67	13.6	23	79
number554	Male	48	88.1	190.5	24.2765	2.89	5.73	157	164	43.4	4.94	17	34.6	87
number555	Female	46	58.5	161.5	22.429	7.71	11.11	106	358	45.8	4.53	7.3	13	74
number556	Male	45	83.9	174.5	27.5531	3.81	5.75	158	132	46.3	4.9	28.3	22.1	71
number557	Female	53	56.2	163	21.1525	3.6	4.48	132	162	41.7	4.79	14.4	9.6	52
number558	Male	56	79.5	162.5	30.1065	1.87	7.1	156	192	42.9	5.68	19.7	19.3	79
number559	Male	60	76.8	171.5	26.1116	3.85	5.9	162	167	42.9	5.28	27.4	20.5	74
number560	Male	67	75.4	174.5	24.7617	2.31	7.41	152	232	43.2	6.07	23.4	21.3	99
number561	Male	55	79.6	170	27.5433	5.61	11.17	160	276	41.2	4.67	15.1	18.1	83
number562	Male	70	70.1	167.5	24.9855	1.17	11.04	147	363	40.9	5	12	12.7	56
number563	Male	60	80.9	166	29.3584	2.56	7.82	165	236	46.4	5.07	29.9	37	103
number564	Male	61	81.8	179.5	25.3878	2.3	4.28	147	264	44.3	5.23	18.6	15.8	64
number565	Male	55	70.7	168	25.0496	2.01	6.23	120	244	45	4.68	9.6	15	37
number566	Male	57	77.2	174	25.4987	3.41	8.34	151	322	40.9	5.6	13.3	14	93
number567	Female	40	60.2	168.5	21.203	4.28	6.31	123	262	43.7	4.89	14.5	23.8	48
number568	Male	51	70.1	168	24.837	2.39	7.91	144	203	41	4.76	13.5	22.6	135
number569	Male	59	62.4	165	22.9201	3.58	5.36	150	184	41.5	4.46	17.3	21.4	47
number570	Male	75	80.8	173.5	26.8418	3.42	5.74	146	137	41.3	8.12	12.9	26.5	82
number571	Male	51	69.7	176.5	22.374	3.13	6.25	152	175	46.7	5.17	10.2	18.5	71
number572	Male	53	69.8	167.5	24.8786	1.94	7.67	148	281	42.9	4.93	15.7	38.5	117
number573	Female	54	62.9	161.5	24.116	1.67	7.52	125	194	42.4	4.96	7.3	16.2	60
number574	Male	48	73.2	171.5	24.8876	2.7	10.99	152	283	43.8	4.05	19.1	39.2	122
number575	Male	56	89.9	177	28.6955	3.81	8.96	162	191	42.9	4.22	14.9	16.4	59
number576	Female	66	68.4	157.5	27.5737	3.6	7.85	148	239	45.2	4.97	15.1	29.6	73
number577	Male	63	63	161.5	24.1544	4.82	7.13	141	239	41.2	4.98	8.9	44.9	85
number578	Male	55	57.7	165.5	21.0659	3.84	4.72	126	270	45.9	5.17	12.7	22.1	85
number579	Male	62	61.1	165	22.4426	3.29	9.36	160	237	43.4	5.28	10.4	14.6	124
number580	Male	53	78.3	160.5	30.3957	1.79	7.89	146	285	44.1	7.5	19.4	17.6	82
number581	Male	41	68.5	167.5	24.4152	1.48	6.03	161	196	45.6	4.42	14.9	29.1	101
number582	Male	55	88.5	169.5	30.8038	1.91	7.29	144	292	41.7	4.88	10.3	15.9	126
number583	Male	54	65.6	168.5	23.1049	1.67	7.7	149	146	45	5.2	19.5	12.6	96
number584	Male	52	74.5	183.5	22.125	3.66	4.54	139	203	46.2	5.73	32.3	13.2	40
number585	Male	65	72.4	163	27.2498	2.71	6.53	137	235	40.9	5.34	17.8	39.9	72
number586	Male	52	74.3	182	22.4309	3.59	5.28	152	171	43.6	4.78	19.5	11.5	73
number587	Female	40	52.9	161.5	20.282	2.61	5.6	122	155	46.6	4.9	13.6	24.8	62
number588	Male	82	47	155.5	19.4374	5.07	8.99	139	175	40.7	5.49	12.8	6.8	47
number589	Female	42	54.2	154.5	22.7061	3.35	7.33	138	201	43.5	5.11	18.2	8.5	98
number590	Male	60	73.4	180	22.6543	3.76	7.27	152	227	44.1	7.46	16.6	25.4	81
number591	Male	51	64.7	169	22.6533	1.79	4.73	126	208	45.2	5.41	13.2	14.8	56
number592	Male	62	71.3	166	25.8746	1.5	3.47	137	186	47.2	7.79	13.7	60.9	62
number593	Male	51	84.7	187	24.2215	3.76	5.96	147	252	42	5.78	9.2	17.9	80
number594	Male	65	57.1	156.5	23.3135	2.58	6.19	160	215	45	4.86	22.2	20.3	61
number595	Male	37	76.8	171	26.2645	1.86	6.31	158	210	46.2	4.63	23.5	59.7	112
number596	Male	60	85.4	163.5	31.9464	2.67	6.73	161	265	44.5	6.27	9.7	28.1	75
number597	Male	54	71.2	163	26.7981	2.84	4.77	156	198	46.1	5.2	14.2	24.4	86
number598	Male	49	75	163	28.2284	7.98	7.23	149	223	43.7	5.27	15.7	28.5	95
number599	Male	76	71.2	171.5	24.2076	2.31	5.17	134	220	42.8	5.09	24.9	13.7	69
number600	Female	54	61.5	167	22.0517	2.63	4.13	146	157	45.8	5.36	15.7	12.1	82
number601	Male	74	57.7	155	24.0166	3.91	5.89	141	205	43.2	6.25	25.9	16.7	63
number602	Male	50	75.8	170	26.2284	2.08	7.15	150	233	45	4.98	21	41	52
number603	Female	56	56.6	151	24.8235	4.94	5.82	149	332	46.8	4.97	11.9	19.5	123
number604	Male	57	82.5	168	29.2304	2.94	8.69	154	148	41.8	4.61	15.8	19.9	102
number605	Male	73	50	178	15.7808	2.1	5.21	150	212	47.6	4.83	22.7	12.6	74
number606	Female	44	49.3	156	20.2581	2.77	5.19	128	164	43.8	4.64	7.9	10.1	76
number607	Male	59	73.4	160	28.6719	2.91	7.48	149	149	45.9	5.94	17.6	46.1	65
number608	Male	80	58.2	160	22.7344	2.34	6.97	137	218	42.9	12.6	16.1	11.6	108
number609	Male	54	55.2	170	19.1003	3.75	4.94	124	160	42.7	4.75	15.4	9.6	58
number610	Male	81	80.5	171	27.5298	4.8	7.77	158	180	45.8	5.37	18.2	15.8	79
number611	Female	45	69.5	162	26.4822	4.43	9.4	136	264	48.8	4.82	6.6	23	49
number612	Male	82	60.1	160.5	23.3305	3.76	6.65	134	279	44.9	7.33	31.8	15	75
number613	Male	65	67.3	168	23.845	2.33	6.98	144	192	38.8	10.44	16.6	15	82
number614	Male	85	64.5	163.5	24.1282	4.27	6.89	143	248	43	5.52	13.3	19.1	103
number615	Male	59	67.4	165	24.7567	2.7	8.8	153	214	43.3	4.58	18.9	62.2	95
number616	Male	77	58.5	163.5	21.8837	3.35	6.16	152	138	43.1	7.74	18.6	32.5	131
number617	Male	78	64	161.5	24.5378	2.26	5.88	137	147	38.8	7.81	16.6	18.7	89
number618	Male	71	66.8	168.5	23.5275	3	8.03	154	226	44.4	4.98	18.6	27.2	109
number619	Male	79	66.7	166.5	24.0601	3.46	5.53	144	261	43.9	5.59	13.2	9.6	49
number620	Female	41	58.7	158.5	23.3657	6.53	4.98	130	243	44.8	5.12	13.1	12.6	51
number621	Male	62	84.7	181	25.8539	1.47	4.4	150	175	41.8	5.56	27.7	15.1	63
number622	Female	45	59.8	157.5	24.1068	2.19	6.16	137	296	41.5	4.74	7.9	18.7	62
number623	Male	57	71.7	168.5	25.2534	3.31	5.85	145	110	43.7	4.98	15.2	40.2	109
number624	Male	44	87.3	179	27.2463	2.45	6.66	153	175	45.5	4.46	11.1	23.9	74
number625	Male	86	65.1	167.5	23.2034	2.22	7.75	136	196	41.7	6.36	17.7	33.6	54
number626	Female	47	56	156	23.0112	4.85	4.51	122	265	41.5	4.45	15.3	13.5	59
number627	Male	61	66.9	166	24.2778	3.27	7.2	168	255	46.1	7.61	14.3	14.9	96
number628	Male	55	84.6	176	27.3115	3.67	6.18	152	202	46.4	4.9	16.4	26.2	88
number629	Male	49	79	177	25.2163	1.84	4.3	163	212	43.4	5.19	17.2	21.4	50
number630	Male	63	69.9	170	24.1869	3.46	7.77	140	381	44.9	7.41	12.2	14.6	69
number631	Male	56	83.9	167	30.0835	3.11	5.93	148	183	42	5.39	10.1	27.5	63
number632	Male	78	70	165	25.7117	4.17	7.74	154	206	47.6	8.23	20.9	33.1	71
number633	Male	56	61	160	23.8281	3.06	5.9	148	258	43.4	4.9	8.8	15.7	60
number634	Male	77	47.4	163	17.8403	2.58	2.74	148	75	44.4	5.79	14.1	26.3	78
number635	Male	53	72.2	166	26.2012	1.83	4.71	154	243	46.7	5.17	17.7	33.2	54
number636	Male	52	62.5	165	22.9568	2.1	5.47	147	177	45.8	10.58	13.8	27.6	81
number637	Male	55	66.2	165	24.3159	2.9	5.56	160	227	43	5.22	24.4	28.5	77
number638	Female	48	57.6	164	21.4158	4.8	4.15	135	207	45.1	4.1	12.7	19.3	74
number639	Male	40	81.4	168	28.8407	4.63	7.51	159	237	48.1	6.62	16.5	20.5	77
number640	Male	78	62	162	23.6244	3.07	5.08	137	207	47.9	5.72	13.1	18.9	72
number641	Male	40	70.8	169	24.789	2.45	6.4	173	202	45.4	5.14	13.1	34.8	80
number642	Male	37	69.2	161	26.6965	2.48	7.96	150	267	46	4.72	17.8	64.9	64
number643	Female	62	73.7	172	24.9121	3.56	4.6	131	134	44.5	5.41	11.9	16.7	109
number644	Male	64	65.7	162	25.0343	3.69	6.19	142	172	47.1	5.74	21.4	11.8	68
number645	Male	54	68.2	159	26.9768	1.79	5.23	149	175	44.9	4.95	15.1	24.3	123
number646	Male	57	65.5	169	22.9334	2.74	6.57	129	207	47	6.78	13.9	18.5	80
number647	Male	56	65	173	21.7181	3.46	6.94	147	276	44.8	5	9.9	17.6	90
number648	Female	40	61.7	157	25.0314	1.84	5.19	106	237	41.8	4.67	5.6	10.7	85
number649	Male	49	64.6	170	22.3529	2.31	4.64	160	172	45.9	5.29	14.4	15.7	85
number650	Male	57	83.2	171.5	28.2875	4.1	7.56	137	200	42.1	4.76	22.5	24.5	85
number651	Male	50	72.1	165	26.483	3.38	6.04	151	223	43.7	5.14	12.7	14	79
number652	Female	40	64.8	164.5	23.9466	2.98	7.39	136	244	44.3	5.05	15.8	8.3	59
number653	Male	74	59	170	20.4152	2.82	6.33	136	233	43.2	7.65	16	25	94
number654	Male	45	70.5	169	24.684	3.3	8.19	158	230	43.2	4.55	20	46.8	133
number655	Male	63	89.4	184	26.406	4.8	6.99	149	191	43.2	6.11	21.2	38.9	79
number656	Female	43	57.9	161	22.3371	2.17	5.13	124	218	41.6	5.19	8.8	12.9	61
number657	Male	46	64.1	172	21.6671	3.5	5.73	146	268	47.4	5.08	13.5	42.6	79
number658	Male	57	61.4	161.5	23.5409	5.3	8.11	161	226	45.4	4.38	16.8	18	90
number659	Female	57	56	170.5	19.2637	1.53	4.63	116	212	40.7	4.4	8	34.1	107
number660	Male	66	92.2	181	28.1432	2.02	7.71	143	259	45.3	4.83	17.4	71.4	79
number661	Female	53	63	158	25.2363	3.55	5.07	131	189	44.5	4.93	9.1	16.3	83
number662	Female	66	55.3	157.5	22.2928	2.96	6.57	130	210	43.5	4.63	11	25.5	105
number663	Female	36	53.4	163	20.0986	3.44	5.51	119	374	41.4	4.65	9.7	12.3	71
number664	Male	39	59	160	23.0469	1.74	5.66	144	239	47.4	5.24	17.7	11.3	95
number665	Male	48	74.6	174	24.64	3.3	5.77	147	218	43.8	4.81	15.1	32.7	54
number666	Female	56	56.7	165	20.8264	2.57	5.78	126	219	44.9	5.05	10.5	7.1	74
number667	Male	40	78.3	181	23.9004	4.51	6.52	158	282	43.9	4.73	12.8	40.4	87
number668	Male	50	72	162	27.4348	1.48	8.35	157	296	46.7	5.21	18	28	104
number669	Male	69	70.1	168	24.837	3.83	4.66	134	258	40.8	4.53	13.9	15.7	44
number670	Male	47	73	168	25.8645	2.35	5.54	165	189	45.7	5.28	19.1	12.5	79
number671	Male	47	64.4	165	23.6547	3	5.17	149	208	44.6	4.19	15.1	20.4	66
number672	Male	58	67.3	164.5	24.8704	5.07	4.88	149	110	43.8	4.73	16.8	25.4	76
number673	Male	66	66.5	160.5	25.815	3.86	5.97	151	128	46.3	5.32	35.5	54.1	99
number674	Female	47	47.5	160	18.5547	2.88	4.33	137	172	44.8	4.49	11.7	6.6	66
number675	Female	54	65.3	168	23.1363	1.91	5.26	122	259	44.2	4.16	10.2	14.7	77
number676	Male	48	62.9	164.5	23.2444	1.75	5.55	155	225	46.4	4.64	10	21.9	124
number677	Male	54	65.1	163	24.5022	5.73	7.63	147	263	44.2	4.77	16.3	19.8	69
number678	Male	56	74.4	166	26.9996	2.92	6.55	149	231	44.3	7.06	18	38.6	82
number679	Male	42	57.2	162.5	21.6615	2.75	4.96	136	191	42.9	4.62	8.4	19.4	75
number680	Male	44	66.3	167.5	23.6311	2.91	5.22	161	246	45.8	4.77	19.9	22.9	74
number681	Male	41	77.2	168.5	27.1905	1.4	5.23	155	238	48.5	5.61	10.6	66.3	79
number682	Male	57	83	165	30.4867	4.53	9.68	156	201	43.2	6.07	15	12.8	105
number683	Male	40	81.6	175	26.6449	2.39	3.78	143	178	46.7	6.63	11.8	95.7	105
number684	Male	42	59.3	172	20.0446	1.79	5.82	163	188	43.9	4.29	27.1	27.4	51
number685	Male	54	70.1	167	25.1354	3.88	10.52	135	154	44.4	4.99	12.3	26.3	97
number686	Male	63	71	172	23.9995	1.82	5.14	136	186	46.5	4.85	29.3	7.7	79
number687	Male	43	60	163	22.5827	2.28	6.95	125	254	46	4.44	11.6	23.4	113
number688	Female	37	65.1	162	24.8057	2.83	7.57	143	253	48.4	4.62	13.7	20.1	80
number689	Male	42	61	167.5	21.742	5.3	6.5	158	209	45.2	4.66	16.2	18.3	98
number690	Male	57	56.3	166.5	20.3086	4.86	3.26	159	163	43.2	5.15	16.7	47.3	86
number691	Male	58	60.5	169	21.1827	3.36	4.36	147	231	45.7	4.77	15.9	21.8	59
number692	Male	65	73.6	174.5	24.1706	3.85	6.57	151	251	43.9	5.03	13.1	12.6	71
number693	Male	52	70.8	167	25.3864	1.2	6.75	151	157	42.1	4.68	18	26.6	77
number694	Male	58	84	174	27.7447	3.41	8.67	168	281	40.2	11.84	26.6	20.9	122
number695	Male	47	94.8	172.5	31.8589	3.58	5.59	149	251	44.6	7.48	10.1	46.1	109
number696	Male	63	58.4	165.5	21.3215	2.01	3.22	147	156	47.7	4.84	15.7	19.7	50
number697	Male	41	70	170	24.2215	2.18	5.43	155	242	47.8	4.9	13.9	20.1	82
number698	Male	52	88.7	183	26.4863	4.45	6.26	169	274	41.3	5	14.4	16.6	63
number699	Male	39	67.9	173	22.687	2.71	5.22	152	242	50.8	5.43	20.7	6.1	84
number700	Female	55	66.4	157.5	26.7674	5.08	6.94	145	271	46.2	6.01	15.1	68.1	99
number701	Male	57	85.2	178.5	26.7401	1.4	5.76	179	207	45.9	4.74	14.7	46.9	108
number702	Male	48	59.6	166.5	21.499	4.8	5.73	149	224	46.3	4.92	13.7	57.9	96
number703	Female	49	58.9	158	23.594	3.7	5.79	122	225	43	5.14	19.6	6.3	53
number704	Male	54	61.7	168	21.8608	2.13	5.55	147	268	45.3	6.12	19	14.7	67
number705	Female	54	68.7	159	27.1746	1.81	5.22	133	223	47.3	4.55	10.8	17.7	72
number706	Male	53	68.1	172.5	22.8859	2	4.3	143	117	43.4	4.7	25.8	24.1	86
number707	Male	55	60.8	161.5	23.3109	2.67	6.35	149	239	43.4	5.21	15.3	18.7	72
number708	Female	62	52.5	156	21.573	2.62	3.94	132	195	44.7	6.01	21.5	17.6	64
number709	Male	63	82.9	174.5	27.2247	2.66	5.77	146	215	44.2	5.32	20.6	24.8	101
number710	Female	49	53.3	160	20.8203	3.51	3.8	128	171	42.7	4.86	11.1	9.5	70
number711	Male	82	66.6	167.5	23.738	4.37	6.64	128	226	48.1	6.65	22.9	39.7	59
number712	Female	54	68	161.5	26.0714	2.32	3.97	129	185	44.2	5.21	12.5	12	75
number713	Female	58	75.9	165.5	27.7106	3.59	4.21	135	172	44.3	4.96	13.7	14.2	94
number714	Female	55	52.7	154.5	22.0777	2.11	5.21	126	192	44.6	5.16	12.9	13.2	101
number715	Male	66	69.2	169.5	24.0861	2.5	4.18	146	221	49.6	5.58	23.1	9.8	69
number716	Male	53	58.3	155	24.2664	2.46	4.56	142	220	43.4	4.84	11.5	20.5	69
number717	Male	42	78.6	168.5	27.6836	4.47	6.83	156	234	46.8	4.31	15.5	20.1	70
number718	Male	50	75.8	163	28.5295	3.15	7.31	163	255	42	4.75	21.4	39.6	73
number719	Male	66	78.5	178	24.7759	1.89	6.91	153	209	45.1	5.1	15.7	29.9	59
number720	Female	57	62.2	164.5	22.9857	3.43	4.8	132	251	42.7	4.93	12.5	10.1	97
number721	Male	53	69.9	168.5	24.6194	3.83	5.95	151	250	48.9	4.71	13.1	10.1	96
number722	Female	49	65.4	161.5	25.0745	1.76	5.16	131	250	42	4.6	11	8.1	70
number723	Male	62	60.4	167	21.6573	1.25	5.49	143	175	44.8	5.1	12.2	9.5	92
number724	Male	56	68.7	164	25.5428	2.74	6.26	148	166	46.2	5.01	13.5	25.3	92
number725	Male	62	75.5	162	28.7685	5.93	5.1	169	182	48.3	8.8	16.6	78.7	122
number726	Female	57	51.6	164	19.185	3.28	4.45	141	182	49.6	5.29	12.9	11.9	84
number727	Male	46	67	167	24.0238	1.77	4.75	145	152	45.6	5.28	23.6	67.6	69
number728	Male	42	66	162	25.1486	2.03	5.76	139	267	49.4	4.87	14.3	18.6	93
number729	Male	55	66.5	161	25.6549	2.3	5.36	137	228	42.3	7.87	10.9	11.5	87
number730	Male	39	95.4	177	30.451	4.2	5.39	151	214	45.9	5	17.8	27.8	70
number731	Male	52	69	169	24.1588	3.42	7.57	167	265	43.5	4.7	19.2	16.6	83
number732	Male	37	63.4	173	21.1835	2.34	3.68	152	300	46.7	4.96	20.3	11.4	77
number733	Male	49	87.3	172	29.5092	1.73	5.47	140	227	40.4	8.16	20.7	15.8	100
number734	Male	85	66.2	166	24.0238	4.6	4.87	135	147	46.2	6.47	14.6	26.5	94
number735	Male	58	67.6	164	25.1338	3.89	5.6	163	244	47.4	5.4	12.9	20	61
number736	Female	59	51.4	162	19.5854	3.67	4.85	125	139	44.2	4.56	12	10.5	139
number737	Female	47	54.8	160	21.4062	2.36	5.55	142	262	43.8	5.37	7.4	10.6	113
number738	Male	72	71.5	165	26.2626	2.71	5.26	150	213	44.1	4.8	16.6	13.6	97
number739	Female	54	68	164	25.2826	3.2	5.24	145	254	44.5	5.38	11.2	28.8	72
number740	Male	50	65.8	169	23.0384	1.17	4.41	158	126	46.1	4.55	14	21.8	97
number741	Male	60	68.3	162	26.025	4.1	4.17	152	139	42.4	5.29	13.8	33.4	64
number742	Male	39	66.5	178	20.9885	2.04	5.91	144	256	45.8	4.44	12.2	13.6	79
number743	Male	49	69.7	165	25.6015	2.07	6.27	169	189	43.5	4.37	22.9	11.3	70
number744	Male	41	70.9	171	24.2468	1.88	5.77	142	272	47.2	4.63	18.2	21.8	73
number745	Male	65	68.6	170.5	23.598	2.61	5.4	158	186	46.5	4.61	19.3	18.1	73
number746	Male	43	56.4	167	20.223	2.19	5.93	161	176	48.7	5.1	15.8	16.2	78
number747	Male	54	77.4	171	26.4697	2.36	5.95	153	195	45.4	4.64	23.7	16.8	74
number748	Female	59	90.9	171	31.0865	1.98	6.75	140	263	43.8	5.03	26.5	32.4	110
number749	Male	61	61	161	23.533	2.33	5.73	149	208	48	4.72	22.9	31.1	65
number750	Male	55	74.5	166	27.0359	3.27	4.85	157	206	48.4	5.84	11.6	41.7	107
number751	Male	40	60.7	160	23.7109	3.74	8.46	152	200	45.3	5.27	15.3	26	116
number752	Male	41	77.1	168	27.3172	3.08	6.55	151	246	45.7	4.98	12.2	20.6	96
number753	Male	50	77.6	172	26.2304	1.82	4.15	141	166	48.2	7.51	14	9.9	79
number754	Female	45	51.6	150	22.9333	1.97	7.6	141	289	47	4.79	4.6	12.7	70
number755	Male	39	65.3	187	18.6737	5.38	4.09	139	171	46.1	4.59	17.4	17.7	77
number756	Male	51	65.5	167	23.486	3.79	6.32	137	241	42.8	7.25	8.2	20.9	62
number757	Male	41	80	165	29.3848	1.77	6.52	159	241	44.3	5.31	13.6	86	73
number758	Male	46	75	172	25.3515	4.03	8.83	140	404	45.4	4.97	11.7	15.4	123
number759	Female	42	57.7	165	21.1938	5.55	5.5	127	169	44.3	5.02	15.5	15	50
number760	Male	43	60.5	162	23.0529	2.9	9.05	138	329	43.2	4.23	9.9	13.6	129
number761	Female	55	61	171	20.8611	1.86	5.73	127	223	44.7	5.04	9.4	14.3	67
number762	Male	44	65.2	157	26.4514	2.91	9.07	156	252	43.6	4.79	8.6	21	109
number763	Male	57	74.6	176	24.0832	3.53	6.04	152	243	45.6	5.31	15.5	17	80
number764	Male	38	68.4	178	21.5882	3.21	6.01	146	293	45.8	5.2	17.7	14.9	96
number765	Female	41	40.5	159	16.0199	2.09	6.75	117	230	45.7	4.1	11.1	8.6	42
number766	Female	38	50	158	20.0288	2.88	5.38	127	221	45.9	4.38	22.6	10.5	42
number767	Male	40	67.3	167.5	23.9875	3.68	6.19	164	282	46.8	4.53	20.9	23.5	107
number768	Male	60	63.9	164	23.7582	1.89	6.8	154	215	44	5.82	16.9	15.5	81
number769	Male	66	56.8	169	19.8873	1.55	3.33	147	157	43.3	5.53	15.1	10.1	68
number770	Male	73	65.2	166.5	23.519	2.13	7.29	138	197	42.8	4.88	10.9	21.9	75
number771	Male	80	77.6	170	26.8512	2.35	6.24	141	201	43.3	6.29	18.5	16.7	58
number772	Female	75	58.3	145	27.7289	3.68	5.85	154	170	49.4	5.45	14.1	29.5	62
number773	Male	32	71.1	173.5	23.6195	2.19	9.92	160	216	48.6	5.13	19	15.6	111
number774	Male	51	75.7	171	25.8883	2.25	6.62	159	231	45.1	5.45	36.1	28.6	82
number775	Male	31	71.3	168	25.2622	2.44	7.75	153	299	49.6	5.21	10.6	64.6	104
number776	Male	39	67.2	165	24.6832	1.92	6.17	146	239	45.4	4.69	17.4	9.4	59
number777	Male	43	83.4	174.5	27.3889	2.88	9.29	167	291	48.4	4.9	16	25.4	98
number778	Male	29	64.6	168	22.8883	1.85	6.16	159	257	48.5	5.09	10.7	77.2	58
number779	Male	33	76.1	171.5	25.8736	2.79	6.42	141	217	42.9	4.87	14.2	10.9	99
number780	Male	76	68.7	168	24.341	2.83	9.97	142	144	45.8	5.69	13.7	22.1	84
number781	Male	81	72	172	24.3375	1	4.81	141	135	38.6	6.96	16.2	6.3	69
number782	Male	38	85.6	177	27.3229	3.72	6.95	159	177	43.8	4.35	14.3	44.8	81
number783	Male	35	69.4	170.5	23.8732	2.45	7.15	159	287	45.3	4.78	11.3	17.5	93
number784	Male	43	79.5	173	26.5629	1.82	5.35	167	240	45.4	4.84	18.1	77.3	91
number785	Female	74	44.6	149	20.0892	1.34	5.89	107	169	48.8	6.65	13.9	22.4	101
number786	Male	41	70.3	161	27.1209	2.05	6.68	140	181	46.8	4.83	21.3	25.8	47
number787	Male	41	76.4	174	25.2345	3.35	7.32	152	244	46.4	4.68	10.7	63.7	53
number788	Female	48	56.8	167.5	20.245	2.76	5.8	131	287	44.7	5.04	13.5	5.2	41
number789	Male	46	79.5	176	25.665	6.43	6.2	152	209	45.5	5	15.3	20.3	102
number790	Male	40	57.7	170	19.9654	1.36	6.31	138	223	44.9	5.06	7.3	12.6	104
number791	Male	61	80	176	25.8264	2.45	8.42	151	262	42.5	4.98	15.4	17.4	64
number792	Male	44	88	174	29.0659	3.05	6.93	166	277	44.5	5.3	15.1	30.5	99
number793	Male	61	80.3	165	29.4949	2.6	8.19	141	184	40.9	4.89	11.3	31.9	50
number794	Male	51	74.4	168	26.3605	2.79	6.48	151	260	45.8	5.49	14.2	26.9	64
number795	Male	44	73.7	175	24.0653	2.88	5.97	135	223	45.7	5.03	17.2	48.8	66
number796	Male	60	88.1	180	27.1914	1.5	7.05	150	142	45.5	4.77	50	18.4	68
number797	Male	53	81.5	178	25.7228	1.67	7.03	141	234	43.2	4.68	17.1	22.3	189
number798	Male	49	75.8	177.5	24.0587	4.87	5.07	150	182	45.7	4.76	22.3	10.5	98
number799	Male	46	67	170	23.1834	1.96	6.79	154	185	48.2	4.8	13.4	18.4	80
number800	Male	52	81.5	185	23.813	4.09	5.68	156	261	44.3	4.43	20.8	22.8	71
number801	Male	34	73	176	23.5666	1.75	6.58	148	222	47.8	5.17	15.6	20.3	55
number802	Male	76	61.6	164	22.903	4.15	5.52	149	257	44.1	5.57	26.9	20.2	107
number803	Male	56	72.5	173	24.224	1.78	8.16	155	186	45	4.78	17.4	21.4	58
number804	Male	39	77.8	176	25.1162	3.12	6.22	151	258	49.5	4.89	17.8	17.9	116
number805	Male	34	72	164	26.7698	2.19	6.36	142	194	45.4	4.42	20.3	14.6	79
number806	Male	51	66.2	165	24.3159	3.43	4.88	159	166	42.2	4.19	13.9	42	89
number807	Male	55	64.5	168	22.8529	3.62	8.22	137	283	44.5	5.05	13.1	32	72
number808	Male	54	68.5	165	25.1607	2.7	10.48	154	252	46.2	4.12	10.7	10.7	101
number809	Female	50	52.6	160	20.5469	6.46	6.16	141	243	43.3	4.38	12.5	12.6	49
number810	Male	57	69.2	165	25.4178	2.79	3.16	149	90	46	4.93	20	22.7	94
number811	Male	42	100.3	182	30.2802	2.8	6.95	154	291	47.5	4.71	14	16.9	41
number812	Male	40	77.1	182	23.2762	3.66	4.98	151	248	48	4.68	23.6	19	70
number813	Female	50	62.2	166	22.5722	2.39	7.25	145	235	45.7	4.79	14.2	13.9	80
number814	Female	43	50.5	156.5	20.6188	6.94	5.19	128	204	42.9	4.78	12.1	16.3	45
number815	Male	45	77.4	176	24.9871	3.8	4.92	152	145	45.8	4.46	28.5	218.4	93
number816	Male	44	72.4	168	25.6519	0.96	5.18	144	170	45.9	6.15	16.6	14.1	90
number817	Male	50	72.9	175	23.8041	4.11	8.11	158	286	46.3	5.08	19.4	22.5	66
number818	Male	80	47.3	165	17.3737	2.85	6.15	130	134	46.2	5.83	26	18	87
number819	Male	60	64.2	161	24.7676	2.58	7.17	160	212	45.1	5.37	19.2	40.5	89
number820	Female	38	49.9	158	19.9888	3.03	6.17	132	217	45.2	4.57	27.3	14.8	54
number821	Male	39	68.7	168	24.341	5.55	6.08	134	176	45.9	5.15	13.7	15.2	83
number822	Male	38	76.7	173.5	25.4798	1.54	5.89	143	171	45	4.69	24.8	22.2	89
number823	Male	44	67	170	23.1834	3.68	5.36	148	236	48	6.38	13.6	46.3	79
number824	Male	35	79.4	173.5	26.3768	3.58	8.37	160	328	48.8	4.54	17.1	38.1	91
number825	Female	54	70.6	166	25.6206	2.53	4.34	131	189	47	5.79	12.8	27.5	124
number826	Male	55	73.7	168.5	25.9578	3.52	5.73	138	251	42.6	5.9	11.2	17.2	69
number827	Male	50	50.8	161	19.598	3.65	4.31	158	133	39.8	5.31	19.7	50.4	79
number828	Male	52	73.5	172	24.8445	7.74	7.15	160	153	44.8	4.5	12	16.1	67
number829	Male	55	80.1	163	30.1479	1.37	4.32	152	214	47.2	4.91	32.1	24.7	83
number830	Female	66	60.7	161	23.4173	3.19	5.42	128	123	44.7	5.39	8.7	10.4	112
number831	Male	46	77.8	170.5	26.7628	3.71	7.14	159	189	47.6	4.47	10.1	26.3	58
number832	Male	57	71	167	25.4581	2.28	5.44	139	240	43.7	4.96	15.4	16.3	90
number833	Male	52	82.1	165.5	29.9742	3.69	6.21	132	335	42.4	4.63	11.1	60.7	90
number834	Male	44	65	168	23.03	1.29	6.32	139	259	45.4	4.65	8.8	50.2	101
number835	Male	41	56.2	166.5	20.2725	1.76	7.98	148	190	45.6	4.91	8.7	11.6	98
number836	Male	31	66.8	163.5	24.9885	3.13	7.09	152	249	48.7	4.8	21.7	14.4	93
number837	Male	48	68.9	165.5	25.1549	4.49	7.87	145	206	46.2	4.83	13.2	32.5	85
number838	Female	37	59.1	153	25.2467	3.91	6.15	140	259	45.1	4.49	7.2	16.6	59
number839	Female	41	54.8	153	23.4098	1.76	5.3	137	248	42.6	4.73	17.6	54.8	59
number840	Male	53	74.4	167	26.6772	3.93	7.75	157	311	44.7	5.23	8.3	21.2	77
number841	Male	46	74.2	181	22.6489	3.26	6.17	150	207	46.2	5.17	14.6	23.8	77
number842	Female	43	59.6	154.5	24.9683	2.19	5.63	125	293	45.2	5.33	10.2	12.7	76
number843	Female	53	49.8	157.5	20.0756	2.43	6.96	141	332	44.2	4.95	16.1	14.2	64
number844	Male	46	71.7	164	26.6582	26.31	11.61	163	273	48.1	4.99	11.8	36.9	111
number845	Male	36	63.8	178.5	20.0237	2.84	5.92	135	205	45.4	4.55	22.1	10.8	65
number846	Female	43	42	147	19.4363	1.75	6.83	123	268	40.8	4.81	9.1	4	57
number847	Female	54	49.6	148.5	22.492	2.39	6.03	128	230	41.3	4.78	16.6	21.2	98
number848	Male	47	82.7	169	28.9556	3.16	8.06	158	257	42	5.54	12.1	50.2	53
number849	Male	53	62.5	155	26.0146	2.1	6.33	144	304	45.8	5.1	13.9	47.2	50
number850	Male	84	61.9	169	21.6729	1.11	8.37	142	166	42.6	6.76	25.2	20.2	131
number851	Male	45	79.2	175	25.8612	4.08	7.1	150	181	44.6	4.59	15	27.3	70
number852	Male	40	71.5	179.5	22.191	3.24	5.95	155	217	46.4	4.51	13	12.3	85
number853	Male	45	64.1	168	22.7112	6.99	6.34	146	260	47.4	4.23	17.4	22.9	82
number854	Male	39	68	171.5	23.1196	2.81	4.86	151	236	45.2	5.18	10.2	41.4	75
number855	Male	55	76.4	169	26.7498	2.19	6.24	153	185	47.9	4.84	13.5	23.7	83
number856	Male	52	79.2	166	28.7415	2.66	7	165	261	47.7	5.21	17.2	25	49
number857	Male	56	73	170	25.2595	3.81	5.79	156	228	44.4	4.48	15.8	22.3	69
number858	Male	41	73.6	166.5	26.5491	2.62	7.36	157	216	44.5	4.86	26.1	25.5	106
number859	Male	56	73.9	170	25.5709	3.26	6.01	163	178	42.8	7.3	8.3	38.8	84
number860	Female	47	59	171.5	20.0597	1.55	5.14	127	237	40.8	4.38	25.3	8.2	43
number861	Male	55	66.5	164	24.7249	2.31	4.88	139	221	44.6	4.78	13.8	15.6	61
number862	Female	50	49.7	155	20.6868	3.47	6.3	135	234	43.2	4.47	18.6	10.8	73
number863	Male	59	76	175	24.8163	6.19	5.84	153	257	42.4	5.52	26.3	22.7	57
number864	Male	53	72.2	169.5	25.1303	2.84	5.77	155	166	42.2	5.2	27.7	17.3	99
number865	Male	64	66.4	166.5	23.9519	3.23	5.96	145	219	43.9	5.03	19.3	17.7	66
number866	Male	38	85.6	174	28.2732	3	5.85	159	222	47.1	4.95	16.4	32.7	47
number867	Male	57	70.8	164.5	26.1638	1.74	5.07	157	157	43.8	5.33	11.2	30.5	82
number868	Male	44	67.7	167	24.2748	6.82	4.18	156	184	49.5	5.31	14.3	35	87
number869	Male	61	71	172.5	23.8605	1.6	6.2	150	204	47.4	7.9	16.7	18.9	60
number870	Female	45	56.1	154.5	23.5021	2.87	7.1	126	253	46.2	4.85	9.3	13.4	47
number871	Male	43	101.1	170.5	34.7778	3.12	6.36	156	231	44.7	6.5	18.5	53.7	98
number872	Male	46	71.2	166	25.8383	1.24	3.85	148	197	45.9	5.73	17	44.7	81
number873	Male	56	72.7	167	26.0676	2.91	7.75	150	243	45.8	5.4	9.6	8.1	70
number874	Male	58	78.6	172	26.5684	6.61	6.26	165	256	45.1	5.34	28.2	21.6	75
number875	Male	59	61.5	168.5	21.6608	1.91	6.16	158	125	41.4	5.2	21.6	22	85
number876	Male	56	73.8	169	25.8394	5.47	4.1	164	224	43.5	4.87	29.2	25.3	99
number877	Male	52	87	179.5	27.0017	2.32	6.33	157	226	45.4	4.89	20.3	19.6	48
number878	Male	58	63.3	169	22.1631	3.82	5.02	144	250	43.6	5.91	24.7	34.2	109
number879	Male	56	74.6	171.5	25.3636	6.51	6.14	152	120	47.3	5.49	27.5	63.2	58
number880	Male	51	89.1	175.5	28.9283	2.87	8.25	160	196	46.2	8.54	27.6	53.5	68
number881	Male	49	56	163.5	20.9485	4.25	6.1	155	266	46.7	4.78	40.7	24.6	65
number882	Male	94	78.3	180	24.1667	1.66	5.25	128	266	38.6	4.93	13.3	18.8	65
number883	Male	67	56	168	19.8413	2.05	3.97	145	174	41.6	5.97	10.3	28.8	60
number884	Male	86	74.3	168.5	26.1691	2.81	6.43	157	199	44.1	6.23	8.6	15	42
number885	Male	77	78.2	167.5	27.8726	3.58	4.53	146	159	41.4	4.6	18.1	14	65
number886	Male	64	59.9	163.5	22.4074	4.97	4.19	146	190	42.7	5.24	22.2	12.6	50
number887	Male	75	61.9	155.5	25.5994	2.38	5.89	150	213	44	7.41	12.4	31.8	78
number888	Male	81	64.7	165	23.7649	2.07	3.45	136	205	43.7	5.05	10.6	19.6	60
number889	Male	85	77.9	167	27.9322	3	7.2	141	215	45.6	6.46	13.9	15.2	61
number890	Male	77	60.2	161.5	23.0808	4.56	7.91	150	178	44.2	5.1	18	46.7	62
number891	Male	72	81.9	169.5	28.5065	3.62	5.65	131	206	40.7	5.64	15.7	29.9	65
number892	Male	66	64	169	22.4082	2.78	6.86	140	165	40.4	5.5	13.3	15.2	56
number893	Male	65	70.6	173.5	23.4534	2.57	6.65	154	254	42.2	4.73	14	17.2	64
number894	Male	62	80.5	168.5	28.3528	4.9	6.54	147	233	43	5.12	14.4	14.5	87
number895	Male	63	76.5	170.5	26.3156	1.2	4.17	143	204	44.7	5.36	26.7	34.9	223
number896	Male	93	73.4	163	27.6262	2.72	10.05	125	186	35.9	3.04	9.3	21.3	69
number897	Male	92	46.9	157	19.0271	3.3	3.84	109	123	40	4.85	10.2	20	57
number898	Male	81	50.9	165.5	18.5833	3.37	5.36	135	149	44	5.92	16.3	16.8	77
number899	Female	89	69.8	154.5	29.2414	2.5	6.03	145	209	44.7	6.39	11.6	22.9	105
number900	Female	64	60.1	154	25.3415	1.5	4.67	145	119	41	6.24	11.3	34.5	94
number901	Female	63	72.1	172	24.3713	2.9	5.08	134	172	41.9	5.16	14.2	19.8	87
number902	Male	60	73	161	28.1625	2.68	8.79	153	160	46.3	5.63	17	33	60
number903	Male	83	60.1	159.5	23.624	3.48	7.42	137	250	45.4	7.99	31.8	15	65
number904	Male	58	62	168.5	21.8369	2.2	7.53	136	227	48	9.91	11.7	20	60
number905	Male	65	68.8	164.5	25.4247	3.95	7.93	151	269	41.1	11	13	21	88
number906	Male	62	55.2	167.5	19.6748	2.83	5.32	158	135	45.1	5.1	19.2	22	74
number907	Male	64	86.4	170	29.8962	2.71	6.02	157	173	46.6	5.1	18.8	20	49
number908	Male	58	64.9	161	25.0376	1.41	3.68	144	194	44.5	5.55	10.6	17	68
number909	Male	68	61.1	159	24.1683	1.33	7.01	145	285	42.9	4.71	14.2	23	105
number910	Male	58	77.7	171	26.5723	2.12	4.41	144	204	47.3	6.77	17.3	16	64
number911	Female	49	61.3	164	22.7915	4.19	4.39	136	224	39	4.39	14	15	67
number912	Male	66	70.9	172	23.9657	3.46	6.71	159	201	46.9	4.75	19.3	22	66
number913	Male	61	65.2	161	25.1534	2.4	5.13	150	190	43.3	5.74	19.4	31	88
number914	Female	56	53.5	160.5	20.7684	7.53	3.21	119	109	46.4	5.36	8.8	45	122
number915	Male	56	61.4	162	23.3958	3.42	6.66	153	237	51.5	5.71	13	25	64
number916	Male	48	67.6	171.5	22.9836	5.7	4.46	148	245	44.7	4.98	23.6	15	58
number917	Male	55	71.5	176	23.0824	2.1	7.43	153	324	47.5	6.07	19.1	20	53
number918	Male	49	69.8	165.5	25.4835	2.86	6.18	149	284	44.5	4.97	9.3	13	60
number919	Female	54	58.4	162.5	22.116	3.2	3.53	130	213	44.6	5.18	11.1	14	37
number920	Male	69	48	157.5	19.35	4.18	7.48	144	166	44.2	4.7	20.7	16	70
number921	Male	42	69.8	163.5	26.1108	2.68	3.46	153	115	44.1	5.61	20.2	14	67
number922	Male	34	76.6	180	23.642	2.83	7.86	171	182	48.6	4.39	19	15	78
number923	Female	46	60.6	161	23.3787	3.29	5.93	132	279	42.5	5.85	20	21	46
number924	Male	67	64.9	160.5	25.1939	3.84	6.17	155	161	45.7	5.33	36.5	25	73
number925	Female	54	58.1	163	21.8676	1.28	7.01	135	189	43.9	4.95	15.6	26	85
number926	Male	57	63.6	165.5	23.2199	2.02	5.21	145	182	43.5	5.38	12.7	11	71
number927	Male	52	72.2	173	24.1238	2.12	6.24	152	173	43.8	5.86	25.4	22	76
number928	Female	56	54.5	155	22.6847	2.64	6.61	139	197	37.6	5.08	16.3	14	62
number929	Female	56	56	162	21.3382	3.29	5.28	128	231	44.2	5.41	8.4	15	62
number930	Male	57	77.9	171.5	26.4856	3.57	5.07	148	186	42.7	4.77	9.9	26	66
number931	Male	55	88.3	177	28.1847	2.81	5.63	138	197	45.5	5.4	10	25	57
number932	Male	49	58	167	20.7967	4.8	5.38	152	203	43.3	5.34	11.7	48	85
number933	Male	40	69.9	171.5	23.7656	2.38	4.32	141	167	45	5.23	16.7	64	53
number934	Female	58	45.8	151	20.0868	1.45	7.74	140	320	46.7	4.85	11.1	13	79
number935	Male	57	96.1	178	30.3308	3.66	8.54	155	269	45.1	13.56	18	32	74
number936	Female	64	46.3	156.5	18.9039	4.4	5.95	117	273	42.9	7.53	11.1	13.5	72
number937	Male	66	94.7	177.5	30.0575	1.94	4.7	141	166	47.3	8.03	41.8	39.2	56
number938	Male	51	64.1	160	25.0391	2.9	7.21	127	189	41.8	5.21	9.3	21.3	58
number939	Female	53	45.8	150.5	20.2205	11.63	4.51	128	240	46.7	5.08	23.2	16.9	104
number940	Male	63	73.6	163.5	27.5323	6.47	5.39	154	241	47.6	6.8	16.9	36.4	99
number941	Male	56	67.1	165.5	24.4978	2.93	5.84	151	170	39.7	5.42	22.4	24.2	73
number942	Male	47	78.1	175	25.502	7.48	6.03	153	179	42.9	4.83	15	38.8	88
number943	Male	57	73.3	170	25.3633	3.6	5.83	157	181	43	6.22	11.5	25.9	89
number944	Female	56	67.7	160.5	26.2808	5.2	8.4	152	200	43.9	5.54	15	25	98
number945	Female	48	54.3	159.5	21.3441	2.58	5.24	147	238	45.4	6.48	13.7	16.9	112
number946	Male	42	73.9	174	24.4088	3.34	6.26	150	239	45.5	4.69	11	49.4	50
number947	Male	57	85.2	176.5	27.3495	2.79	8.46	155	315	45.9	4.18	22.7	21.2	51
number948	Female	58	60.9	162.5	23.0627	3.08	10.38	142	210	45.9	6.23	15.4	18.8	57
number949	Female	51	50.1	154	21.125	3.64	5.6	133	222	43.4	4.07	31.1	8.3	61
number950	Male	50	69.6	165	25.5647	2.88	5.51	160	143	47.5	4.94	35.1	24.6	116
number951	Male	57	80	174	26.4236	5.98	10.05	144	162	44.7	5.76	9.8	33.6	113
number952	Male	77	61.6	163.5	23.0433	7.4	5.03	151	346	40.7	5.79	16.7	24.5	100
number953	Male	47	72.5	169	25.3843	1.52	5.96	153	267	44.2	5.18	14.1	27.2	56
number954	Female	55	48.5	153.5	20.5838	4.23	5.14	136	223	42.6	5.41	8	17.8	75
number955	Male	35	75.4	175	24.6204	2.34	6.31	147	174	47.3	5.07	19.7	17.8	46
number956	Male	38	67.1	167.5	23.9162	1.79	6.5	156	218	46.9	4.9	23.8	24.2	77
number957	Male	40	65.5	170	22.6644	3.41	7.09	151	252	44.3	4.87	15.1	13	52
number958	Male	59	69.9	166	25.3665	3	8.65	145	257	43.9	7.67	10.5	28.7	70
number959	Female	55	53.8	150	23.9111	4.07	5.57	137	197	43.9	4.91	12.1	33.5	58
number960	Male	83	46.4	155.5	19.1892	5.05	10.13	141	206	39	5.54	9.4	7.4	62
number961	Male	45	86	178	27.143	2.37	5.61	151	148	47.4	4.75	15.7	28.4	75
number962	Male	58	58.3	165	21.4141	6.17	9.32	148	407	40.9	4.89	9.1	13.7	71
number963	Male	46	77.4	172.5	26.0113	1.34	4.23	149	226	43.3	5.29	17.3	14.5	60
number964	Female	43	54.7	150	24.3111	1.22	4.89	130	155	44.1	4.33	29.7	11.4	68
number965	Male	54	64.3	155	26.7638	3.06	7.49	137	249	44.9	5.51	14	73.6	52
number966	Male	58	63.8	168	22.6049	6.3	6.81	146	290	42.3	4.91	11.4	15.5	74
number967	Female	42	58.8	158.5	23.4055	8.37	4.73	124	187	43.7	5.01	12	20.1	48
number968	Male	58	67.1	166.5	24.2044	2.62	6.25	148	147	43.2	5.43	18.2	44.6	79
number969	Male	45	67.9	167	24.3465	1.42	6.1	137	215	46.3	3.86	12	60.7	97
number970	Male	55	62	168.5	21.8369	2.42	6.38	164	291	46.7	4.32	18.7	12.9	62
number971	Male	68	65.7	177	20.971	3.47	5.84	149	205	45.2	4.84	15.5	13.2	59
number972	Male	76	76.5	173.5	25.4134	3.11	6.13	144	151	44.4	11.31	23	31.4	94
number973	Male	61	90.3	181	27.5633	1.68	6.3	156	195	43	5.05	38.5	22.1	57
number974	Male	57	78.4	172	26.5008	3.71	7.8	141	201	45.5	5.83	10.7	16.7	75
number975	Female	57	70	173	23.3887	5.11	5.07	140	167	45.8	4.65	11.6	18.6	46
number976	Male	39	71.2	165	26.1524	2.44	6.93	148	180	46.1	4.84	22	10	69
number977	Male	51	72.2	173	24.1238	5.06	7.89	162	334	47.9	4.61	17.7	27.3	72
number978	Female	83	50.5	151	22.1482	1.71	5.59	122	177	37.8	9.94	13	12.5	72
number979	Female	50	55.6	152	24.0651	5.16	5.81	135	234	46.3	5.01	7	18.5	69
number980	Male	38	70.4	160.5	27.3289	2.71	8.63	150	272	42.6	5.44	19.7	51.1	53
number981	Male	64	89.9	184	26.5536	5.23	6.23	147	200	40.9	6.22	25.5	36.8	73
number982	Male	48	58.9	165	21.6345	2.7	6.45	159	212	43.7	4.24	12.9	17.7	135
number983	Female	67	56.1	157	22.7595	3.6	7.8	124	215	44.8	4.49	11.9	18.7	99
number984	Male	55	83.5	161.5	32.0141	2.46	6.61	147	146	44.2	4.68	16.3	104.1	57
number985	Male	57	68.1	164	25.3198	2.56	5.03	156	207	44.6	4.32	8.5	20.1	86
number986	Female	67	61.4	160.5	23.8352	4.39	5.72	124	141	43.5	5.8	7.4	9.3	92
number987	Female	44	55.9	161	21.5655	2.44	5.63	130	213	43.3	5.26	8.8	17.9	52
number988	Male	58	64.8	156	26.6272	3.75	4.14	141	234	45.2	7.11	15.9	26.1	66
number989	Male	53	74	161	28.5483	3.98	6.31	141	250	42.1	5	11.2	34.4	31
number990	Male	40	68.3	164.5	25.24	2.17	6.92	144	253	43.8	5.09	15.9	12.2	54
number991	Male	40	76.8	173.5	25.513	3.74	5.79	145	262	48.5	4.23	15.6	24	118
number992	Male	51	64.9	169.5	22.5894	1.17	4.06	161	100	43.5	4.75	20.9	36.4	104
number993	Male	44	73.4	174	24.2436	5.3	6.18	151	229	43.8	5.58	22	19.2	61
number994	Male	57	78.8	163	29.6586	2.15	6.15	146	130	40.4	7.44	27.3	29.3	75
number995	Male	42	71.5	177	22.8223	6.16	6.53	143	229	41.7	5.13	15	22	110
number996	Female	41	62.5	157.5	25.1953	2.04	5.16	106	269	40.3	4.56	9.2	8.7	76
number997	Female	58	58	170	20.0692	1.78	4.37	121	213	40.9	4.77	11.4	34.6	96
number998	Male	59	65.2	162.5	24.6911	2.18	9.81	155	221	43.1	4.78	16.1	30.8	85
number999	Male	50	75.4	177.5	23.9318	5.26	4.6	140	175	39.9	4.95	22.7	16.9	83
number1000	Male	41	78.3	182.5	23.5091	3.57	4.92	150	248	45.4	4.96	16.5	21.1	66
number1001	Male	46	59.1	164	21.9735	2.29	6.1	167	306	44.2	4.99	16.1	33.1	83
number1002	Male	53	86.2	179	26.903	2.16	5.4	147	240	42	4.78	9.3	32.3	67
number1003	Male	43	95.9	182.5	28.7934	3.34	6.82	165	301	42.3	4.36	18.2	15.7	42
number1004	Male	45	84.7	170.5	29.1363	1.62	6.53	145	160	44.6	4.83	13.9	95.4	96
number1005	Male	62	83.9	180	25.8951	2.93	4.02	145	211	42.8	5.47	20.2	12.9	57
number1006	Male	45	80.4	176	25.9556	7.16	5.82	157	140	46.1	6.13	14.1	30.3	75
number1007	Male	53	86	175	28.0816	4.59	7.12	146	233	44.7	5.33	16.1	33.3	75
number1008	Male	79	62.9	162	23.9674	3.32	5.63	145	210	46.4	5.67	12.3	20	68
number1009	Male	67	94.4	181	28.8147	1.57	7.89	144	271	43.1	5.36	8.9	59.9	76
number1010	Male	57	69.3	169.5	24.1209	3.04	5.25	146	144	43.7	5.38	27.8	18.8	71
number1011	Male	79	67.9	163.5	25.4	4.37	7.39	156	215	47.3	7.39	19	23.7	54
number1012	Male	57	83.3	167	29.8684	3.41	5.8	160	206	47.8	5.71	9.9	27.5	66
number1013	Male	64	78.8	168.5	27.7541	2.39	7.36	164	195	45.8	7.01	28	19	62
number1014	Male	58	66.3	170	22.9412	3.04	6.07	140	263	45.9	7.28	14.8	12.1	62
number1015	Male	51	73.6	164.5	27.1986	3.25	7.68	143	256	42.8	4.62	9.4	15.7	71
number1016	Male	74	71.2	176	22.9855	5.51	5.36	156	162	43.5	5.71	20	14.3	55
number1017	Male	58	72.5	164.5	26.7921	2.38	6.97	158	189	44.8	5.39	15	19.8	72
number1018	Male	64	68.6	169	24.0188	3.97	10.12	145	364	44.9	6.46	20	15.4	55
number1019	Male	47	80.1	171.5	27.2336	1.51	5.2	145	215	44.6	5.49	11.2	48.9	105
number1020	Male	46	81.8	174.5	26.8635	3.9	6.37	161	136	47.7	4.99	30	25.2	76
number1021	Female	46	70.4	162.5	26.6604	4.34	7.48	139	251	46.1	5.29	9.9	19.7	50
number1022	Female	46	62	158.5	24.6793	2.57	5.69	131	311	40.1	4.88	7.9	16.9	51
number1023	Female	45	50	156.5	20.4146	2.9	5.45	140	191	48.4	4.74	13.5	13.3	68
number1024	Male	54	72	166	26.1286	1.64	9.71	163	227	48	4.7	20.6	17.8	42
number1025	Female	54	47.7	155.5	19.7268	3.27	2.77	142	153	42.8	5.14	15.4	43.7	65
number1026	Male	50	80.2	174.5	26.338	2.09	4.57	161	220	43.2	5.57	14.8	25.2	48
number1027	Male	66	58	157.5	23.3812	3.1	6.22	154	217	44	5.28	23.3	22.8	58
number1028	Male	78	50.4	158.5	20.0619	2.85	3.39	138	81	40.7	6.2	12.3	29.1	61
number1029	Male	65	69.6	163	26.1959	3.98	6.13	144	180	45	5.84	21.7	88.8	118
number1030	Female	39	49.3	151	21.6219	2.18	5.54	115	298	42.2	5.04	10.5	9.3	36
number1031	Male	51	73.5	162.5	27.8343	3.43	6.08	166	242	42.7	5.73	20.6	34.9	100
number1032	Male	51	78.9	171	26.9827	3.83	5.01	155	232	44.9	5.05	21.7	18.4	77
number1033	Male	47	70.3	173.5	23.3537	3.34	4.88	151	151	45.3	5.65	18.6	20.4	95
number1034	Male	50	65.7	170.5	22.6004	2.72	6.26	166	194	43.1	5.5	17	21.3	86
number1035	Female	48	56	156	23.0112	4.78	5.23	124	260	42.9	4.86	13.6	11.9	54
number1036	Male	56	73.3	167	26.2828	2.61	6.05	125	203	47.4	5.95	12.6	25.7	37
number1037	Male	59	69.1	170.5	23.77	1.9	6.1	142	230	44.5	5.07	12.3	20.6	75
number1038	Male	39	84.5	174.5	27.7502	3.24	7.26	156	250	44.1	5.52	19.7	36.1	42
number1039	Female	50	59.3	165	21.7815	3.24	5.43	125	206	43.7	4.53	14.2	13.9	80
number1040	Male	60	63.4	166.5	22.8697	3.69	4.65	145	174	40.7	5.21	12.7	15.4	40
number1041	Male	58	60.3	165.5	22.0151	4.42	7.73	141	99	39.4	5.21	20.8	31.3	55
number1042	Male	51	78	173.5	25.9117	2.73	6.01	145	147	43.3	4.9	8.7	23.2	56
number1043	Male	56	60.7	159	24.0101	2.42	6.91	153	197	42.6	4.6	14.8	23.4	71
number1044	Male	40	64.7	185.5	18.8025	5.36	6.84	139	167	45.5	4.76	15	14.9	79
number1045	Female	55	53.3	149.5	23.8476	3	5.71	127	176	39.8	5.24	13.5	42.3	93
number1046	Male	48	74.5	169.5	25.9309	2.3	6.29	165	176	45.1	5.01	22	14.5	63
number1047	Male	42	77.5	168	27.4589	3.08	7.01	142	240	43.4	5.38	13.1	24.2	83
number1048	Male	72	76.1	176	24.5674	4.25	5.81	144	226	42.9	6.84	13.8	12.2	83
number1049	Male	44	61.3	161	23.6488	3.26	8.73	122	235	41.1	4.43	13.8	28.5	113
number1050	Female	41	64.9	164.5	23.9835	3.76	7.44	137	249	43.9	4.94	14.4	8.9	45
number1051	Male	63	68.6	166	24.8948	3.42	5.07	138	162	41.2	5.02	17.6	14	63
number1052	Male	42	80.8	164.5	29.8593	1.84	6.9	157	242	42.7	5.22	19.1	61	52
number1053	Female	50	54.4	160	21.25	3.16	3.79	130	169	42.4	4.76	12.5	8	51
number1054	Female	54	63.7	156.5	26.0082	4.35	4.97	127	139	42.8	5.47	9.8	23	96
number1055	Male	43	79.3	170	27.4394	3.7	7.42	150	230	44.6	4.22	15.4	21.9	61
number1056	Male	47	71.2	165	26.1524	21.06	9.46	153	244	43.1	5.14	15	7.2	86
number1057	Male	56	78.6	169.5	27.3579	5.55	8.69	161	274	41.2	4.65	13.5	19.7	75
number1058	Male	43	66.1	162.5	25.032	2.27	6.51	140	199	48.1	4.5	15.2	32.1	80
number1059	Male	44	69.8	172.5	23.4573	3.06	5.19	158	190	43.2	4.58	17.8	13.6	80
number1060	Female	42	54.2	153	23.1535	1.79	5.34	133	236	42.5	4.69	17.1	11.3	49
number1061	Male	40	60.8	161	23.4559	1.89	6.68	144	245	43.7	5.65	16.1	16.5	80
number1062	Male	53	72.3	170	25.0173	3.66	7.52	164	276	42.5	4.22	17.7	18.1	67
number1063	Male	48	50.3	157	20.4065	1.7	5.19	132	185	42.8	5.5	10.7	10.3	90
number1064	Male	57	74.5	169.5	25.9309	3.53	6.19	159	194	42.3	4.78	20.4	23.7	60
number1065	Male	44	58	167	20.7967	2.32	5.25	154	176	47	5.13	13	23.2	65
number1066	Male	61	68.8	162	26.2155	4.15	4.72	151	155	41.3	5.62	18.4	43.8	66
number1067	Male	53	80.8	166	29.3221	3.96	6.08	135	330	41.3	4.79	8.9	59	76
number1068	Male	64	70.5	174.5	23.1525	2.72	5.5	142	321	47.6	9.36	21.6	22	46
number1069	Female	51	62.6	161.5	24.001	2.23	5.13	140	186	44.6	4.13	15.9	13.1	52
number1070	Female	57	66	164	24.539	3.74	5.24	138	248	46.6	6.66	13.3	15.1	97
number1071	Male	64	61.8	161.5	23.6943	5.74	7.16	146	237	42.2	6.06	15.8	17.4	79
number1072	Male	56	75.3	165.5	27.4915	3.43	4.75	149	195	44.8	5.26	14.1	38.5	89
number1073	Male	42	73.5	171.5	24.9896	2.12	6.57	140	267	44.8	5.21	16.7	47.6	69
number1074	Male	45	59.8	162	22.7862	1.93	6.79	150	183	45.3	5.18	22.3	15.3	57
number1075	Male	52	62.6	165.5	22.8548	3.66	8.08	137	270	42.5	6.07	9.7	21.2	56
number1076	Male	58	73.9	177	23.5884	3.93	5.79	151	260	45.3	5.75	14.3	15.2	66
number1077	Male	41	70.7	168	25.0496	4.08	7.43	169	276	45.9	5.06	32.9	30.1	99
number1078	Male	42	81.6	171	27.906	1.69	5.17	157	234	51.5	6.39	10.7	55.9	72
number1079	Female	46	60.2	162.5	22.7976	7.62	9.9	104	337	43.4	5.03	7.3	17.6	87
number1080	Male	55	79.5	171.5	27.0296	2.76	6.12	155	130	44.8	5.1	23	22.2	59
number1081	Male	52	72	172	24.3375	2.1	6.49	152	244	44.5	5.08	25.5	22.8	84
number1082	Male	54	88.1	177.5	27.9627	2.43	7.99	148	242	44	4.27	16.1	19.5	112
number1083	Male	58	72.9	166.5	26.2966	2.47	4.93	146	247	44.2	5.02	16	16.4	72
number1084	Female	44	52.3	155.5	21.6292	2.06	7.29	147	329	43.9	4.63	12	19.8	57
number1085	Male	34	75.2	171.5	25.5676	3.11	6.96	148	212	44.5	5.08	18.2	15.9	88
number1086	Male	47	76	172	25.6896	4.69	9.8	141	379	42.8	5.67	13.4	59.7	116
number1087	Male	46	75.6	174.5	24.8274	4.69	6.46	146	201	44.4	4.9	16.2	19.1	57
number1088	Male	39	78.4	176.5	25.1667	3.57	5.69	154	162	42.9	4.75	12.9	29.6	73
number1089	Male	40	65	173.5	21.5931	2.66	6.15	144	215	46.2	5.58	14.1	8.2	54
number1090	Male	49	80.2	165.5	29.2805	4.26	5.76	154	213	46	4.92	14.6	30.4	86
number1091	Male	45	86.3	176.5	27.7027	2.8	6.94	166	268	43.9	5.52	17.6	28.7	94
number1092	Male	54	59.6	154.5	24.9683	2.56	5.35	141	225	44.3	4.86	13.6	26.8	58
number1093	Male	51	76.3	171	26.0935	2.14	4.19	137	170	44.6	7.05	15.3	11.9	68
number1094	Male	31	53.6	168	18.9909	1.97	7.05	142	213	45.6	5.56	31.9	26.1	93
number1095	Female	56	56.1	157	22.7595	1.3	5.16	121	240	45.6	5.12	9.7	25.9	102
number1096	Male	73	70.6	165	25.932	3.56	6.04	148	218	43.3	4.57	15.6	22.5	89
number1097	Male	44	84.3	174.5	27.6845	3.12	9.47	164	299	47.7	4.69	18.1	82.7	86
number1098	Male	58	83	167.5	29.5834	3.03	7.54	153	171	43	5	14.1	27	88
number1099	Male	56	83.3	171.5	28.3215	3.15	6.44	147	243	47.6	7.97	15.2	92.7	55
number1100	Male	58	68.4	165	25.124	2.99	3.77	156	105	44.6	4.81	19.8	25.5	82
number1101	Male	62	79.1	165.5	28.8789	2.46	8.46	140	178	39.6	4.98	9.8	32	47
number1102	Male	61	64.8	164.5	23.9466	2.06	5.8	157	233	43.2	5.77	13.5	15.3	76
number1103	Male	47	66.4	170	22.9758	2.05	6.46	152	182	49	4.78	14	26.5	77
number1104	Male	62	66.1	166	23.9875	3.24	5.71	170	309	43.2	8.41	22.6	16.4	95
number1105	Male	67	71.4	170.5	24.5612	2.89	3.84	143	234	46.4	5.48	21.7	12.5	53
number1106	Female	63	59.8	161	23.0701	2.23	6.23	134	260	42.4	5.31	11.3	13.6	78
number1107	Male	74	62.1	167	22.2668	2.52	6.45	135	187	42.5	4.88	10.8	29.2	75
number1108	Male	81	76.6	168	27.14	2.75	7.98	155	196	42.7	6.57	20.2	24.3	79
number1109	Male	56	82.2	163	30.9383	1.65	5.09	152	233	47.6	5.66	25.2	42.4	74
number1110	Male	54	74	173	24.7252	1.93	5.48	144	159	44.7	4.82	25.1	28.8	80
number1111	Male	50	69.1	164.5	25.5356	2.6	6.85	166	187	45.8	4.86	28.5	15.7	72
number1112	Female	55	61.2	166.5	22.0761	2.66	3.21	140	164	44.4	5.71	14.2	17.6	73
number1113	Male	51	63.2	158.5	25.157	2.36	9.47	149	189	45.5	8.05	9.6	17.2	134
number1114	Male	36	73.8	176.5	23.6901	2.15	4.83	144	210	48.8	4.92	24.3	30.1	84
number1115	Female	42	56.2	153.5	23.8517	2.72	6.58	141	222	45.2	4.05	26.6	12.6	62
number1116	Male	30	72.3	181	22.0689	3.01	5.13	154	189	49.4	5	23.2	15.6	55
number1117	Male	40	74.9	171	25.6147	2.27	7.79	156	303	45.5	4.86	20.9	33.2	114
number1118	Male	37	72.7	165	26.7034	5.6	5.03	165	185	47.1	5	23.7	33.9	62
number1119	Male	59	65.3	163.5	24.4274	4.14	4.23	150	229	46.7	5.45	17.4	13.7	52
number1120	Male	58	67.3	171.5	22.8816	2.5	5.42	147	232	43.6	4.77	16.6	13.3	90
number1121	Male	29	63.6	172	21.4981	3.46	6.41	152	248	48.4	4.75	18.5	10.7	72
number1122	Male	35	73.8	164	27.439	2.12	7.08	143	213	45	4.77	20.5	21	63
number1123	Male	42	73.6	167	26.3903	2.52	6.06	145	196	43.8	5.59	15.2	33	101
number1124	Male	36	70.1	170.5	24.114	2.68	7.63	152	287	45.3	4.69	13	34	85
number1125	Male	32	68.7	168.5	24.1967	2.69	5.31	143	209	47.4	5.04	18	78.3	130
number1126	Male	33	95.6	185.5	27.7824	2.5	6.06	165	251	47.6	5	25	26.2	70
number1127	Male	38	63.8	174	21.0728	2.67	3.69	147	257	44.7	4.95	22.3	11.8	63
number1128	Male	61	72.4	169	25.3493	3.32	6.98	152	219	45.5	8.51	17.3	38.7	93
number1129	Male	39	71.1	178.5	22.3148	4.07	5.39	148	256	47.2	5.62	26.9	25.7	86
number1130	Male	45	64	157.5	25.7999	3.36	7.93	159	196	44.2	5.05	14.1	28.4	83
number1131	Male	52	74.4	168.5	26.2043	2.88	7.07	145	313	44.2	6.28	15.4	23.1	62
number1132	Male	39	78.7	173.5	26.1442	1.54	5	141	174	44.5	4.62	28.2	23.6	55
number1133	Male	50	87.4	172	29.543	2.48	7.02	149	198	40.9	9.13	19.6	19.9	112
number1134	Male	49	85.6	182.5	25.7009	2.21	9.2	142	244	45.6	5.85	11.7	20.2	70
number1135	Female	48	46.8	160	18.2812	3.26	4.6	140	203	46.8	4.85	11.6	10.8	62
number1136	Male	55	67.1	166	24.3504	4.58	5.89	143	216	40.6	5.5	13.6	15.8	79
number1137	Male	81	60.3	169.5	20.9883	1.69	6.34	118	187	39.7	5.1	11	16.6	91
number1138	Male	53	78.4	185	22.9072	4.99	6.08	159	270	49.4	4.82	19.6	22.5	58
number1139	Male	55	82.8	180	25.5556	3.62	6.34	142	155	43.3	4.55	10.9	10.9	76
number1140	Male	57	63.5	161.5	24.3461	3.68	7.51	148	266	44.3	4.62	14.7	13	54
number1141	Male	64	68.4	162.5	25.903	4.69	4.67	134	282	45.9	4.33	10.2	36.7	75
number1142	Male	40	73	180	22.5309	3.65	6.04	147	217	43.1	4.88	14.1	67.6	64
number1143	Female	37	52.2	160.5	20.2638	3.96	7.06	116	322	41.8	4.88	10.5	16.9	69
number1144	Male	52	69.1	166	25.0762	7.52	5.86	168	126	46.2	8.84	34.3	46.7	55
number1145	Male	40	65.4	178	20.6413	2.48	7.03	145	282	43.9	4.78	10.7	11.7	68
number1146	Male	49	87.8	191	24.0673	3.27	5.94	155	164	43.1	4.91	21.4	16.2	67
number1147	Male	56	87	184.5	25.558	2.6	6.99	155	182	44.1	5.05	18.6	32.5	90
number1148	Male	56	69.5	164.5	25.6834	2.67	4.33	128	179	43.1	4.81	13.3	21.5	58
number1149	Male	50	73.3	170.5	25.2148	3.61	9.59	137	306	46.7	5.41	12.1	20	48
number1150	Male	50	77.3	170.5	26.5908	2.21	6.01	149	233	42.7	4.75	26.8	13.4	81
number1151	Female	55	65.9	159.5	25.9038	1.75	6.08	127	208	44.4	4.51	11.3	22.4	69
number1152	Female	44	53.1	156.5	21.6803	6.75	5.6	130	143	42.7	4.78	14.1	25.6	58
number1153	Male	58	62.8	162	23.9293	5.64	8.08	160	228	44.2	4.38	18	21.6	71
number1154	Male	61	72.9	180	22.5	3.88	7.61	149	240	43.3	8.37	18.9	26.1	86
number1155	Male	71	68.6	169.5	23.8773	1.14	9.23	143	338	41.9	4.56	9.2	13.4	49
number1156	Male	60	79.8	175	26.0571	1.77	9.15	144	196	44.5	4.64	12.9	13	79
number1157	Female	30	60.8	164	22.6056	3.97	6.24	126	225	48.3	5.55	14.8	13.7	49
number1158	Male	63	63.5	169.5	22.1021	2.03	6.87	140	131	43.2	6.98	15.8	54.1	100
number1159	Male	56	65.5	160.5	25.4268	2.38	5.42	140	274	43	6.87	10.7	8.9	67
number1160	Male	47	72.1	165.5	26.3232	1.38	5.02	140	187	46.9	5.58	14.7	62.6	81
number1161	Female	55	67.6	165.5	24.6803	2.35	4.64	133	229	45.3	5.04	15	15.9	88
number1162	Female	64	62.7	165	23.0303	3.33	5.94	136	197	47.2	4.97	19.4	20.6	112
number1163	Male	46	63.9	169.5	22.2414	8.12	6.74	145	246	50.2	4.65	14	24.9	77
number1164	Female	54	54.4	163	20.475	3.63	4.89	125	96	42.6	5.15	18.4	21.4	61
number1165	Male	45	85.6	172	28.9346	4.96	6.27	145	200	41.7	5.2	17.3	29.1	106
number1166	Male	52	81.4	171.5	27.6755	2.9	9.31	148	204	48	5.55	14.9	25.2	73
number1167	Male	53	72.4	166.5	26.1162	1.72	7.13	152	119	41.3	5.15	17.8	28	60
number1168	Female	44	45.9	155	19.1051	1.72	4.95	117	233	42.2	4.79	13.5	6	47
number1169	Male	43	59.9	171.5	20.3657	1.78	6.36	168	189	44.6	4.27	27.9	34.3	50
number1170	Female	54	49.9	158.5	19.8629	2.76	5.19	130	349	44.8	5.08	11.9	10	58
number1171	Male	41	58.8	170.5	20.2269	1.6	5.91	139	226	43.7	5.49	19.8	23	59
number1172	Male	44	78.1	173	26.0951	1.6	4.86	154	260	43.8	4.68	23.5	70.5	76
number1173	Male	61	76.1	171	26.0251	4.57	6.06	151	103	42.5	5.18	29.5	43.3	75
number1174	Male	46	71.1	170	24.6021	3.4	8.64	157	224	43.5	4.86	10.6	23.3	108
number1175	Male	48	73.3	166	26.6004	2.57	8.32	160	310	45.9	5.25	15.6	21.2	78
number1176	Male	52	66.8	168.5	23.5275	1.94	4.58	123	204	45.7	5.56	10.8	18.3	49
number1177	Male	64	74.7	178.5	23.4447	3.13	5.28	144	176	41.6	4.71	17	20.7	34
number1178	Male	55	87.2	178	27.5218	2.84	5.89	136	134	43.3	5.23	20.5	28	48
number1179	Male	57	72.9	171	24.9307	3.14	8.32	152	310	44.5	4.8	8.9	16.3	86
number1180	Male	49	68	165	24.977	4.73	8.22	140	210	43.8	5.11	7.3	20.2	92
number1181	Male	32	70.6	164	26.2493	3.25	8.03	142	255	46	5.19	21.3	31.3	81
number1182	Male	54	72.3	166.5	26.0801	4	8.38	148	293	44	4.99	21.9	16.8	68
number1183	Male	54	68.6	166	24.8948	6.4	8.4	161	238	43.3	5.03	19.4	25	77
number1184	Male	57	65.4	173.5	21.726	3.3	8.94	148	256	42.3	4.73	9.7	26.8	75
number1185	Male	70	53.4	156.5	21.8028	4.66	5.41	157	196	43.9	4.62	27.2	34.9	68
number1186	Female	75	45.1	149.5	20.1787	1.33	6.03	101	162	41.4	5.86	8.8	15.1	75
number1187	Female	56	55.3	154.5	23.1669	2.29	4.7	128	166	42.1	5.01	12.8	27.6	94
number1188	Male	40	75.7	165.5	27.6376	2.43	6.24	151	222	46.3	5.2	18.9	38.3	91
number1189	Male	64	66	167	23.6652	2.6	6.91	138	276	46.3	8.09	9.5	20.4	63
number1190	Male	52	69.4	168.5	24.4433	2.59	8.58	137	184	39.1	4.66	10.9	14.7	114
number1191	Male	42	86.6	169	30.3211	2.6	7.74	156	253	45.7	6.14	17.8	32.6	106
number1192	Male	58	83.4	170	28.8581	3.93	4.27	142	120	43.3	6.85	11.7	39.2	89
number1193	Male	41	54.3	164.5	20.0663	1.81	8.27	151	237	46.8	4.96	8.4	38.6	69
number1194	Male	53	73.1	180	22.5617	4.28	5.89	140	165	43.2	4.84	23.8	14.7	71
number1195	Male	55	64.9	168.5	22.8584	1.85	7.7	142	158	45.2	5.42	21.2	12.5	77
number1196	Female	39	48.2	158.5	19.1862	3.17	7.04	133	249	44.6	4.95	20.9	11.7	54
number1197	Male	51	76.5	173.5	25.4134	2.17	6.57	149	202	45.1	5.98	15.4	42.4	45
number1198	Male	62	58.6	160.5	22.7482	2.32	5.23	145	207	44	5.12	20.8	25.6	48
number1199	Female	58	61.3	164.5	22.6532	3.69	5.99	140	227	43.2	4.63	15	11.2	80
number1200	Male	63	58.3	167	20.9043	1.13	5.71	144	207	41.3	5.13	14.4	9.2	75
number1201	Female	50	66.2	161.5	25.3812	2.08	5.88	136	275	44.5	4.66	15	10.2	62
number1202	Female	43	59.7	165.5	21.7961	5.88	6.52	129	179	43.1	5.03	12	12.8	51
number1203	Male	58	57.5	167	20.6174	5.11	3.46	151	162	43.9	5.77	20.9	49.2	78
number1204	Male	68	76.8	175.5	24.9349	2.16	8.43	145	216	41	6.61	19.4	20	89
number1205	Male	57	70.2	166	25.4754	3.11	7.78	141	221	44.1	5.04	10.3	12.4	67
number1206	Male	56	93.3	168	33.057	1.99	8.49	129	189	42.8	5.1	16.8	44.8	127
number1207	Female	41	53.8	162	20.4999	2.8	4.18	117	126	45.3	4.76	12.7	40.8	53
number1208	Male	45	69.2	170.5	23.8044	4.52	6.01	142	249	47.2	6.86	10	60.3	96
number1209	Male	62	80	165	29.3848	1.95	5.38	128	152	44.6	5.84	12.7	29.1	68
number1210	Male	52	85.3	187.5	24.2631	4.03	5.53	144	241	40.8	6.54	11.4	23.5	82
number1211	Male	52	69	177.5	21.9004	3.2	5.44	146	170	45.3	6.22	18.8	32.2	63
number1212	Male	58	70.2	169	24.579	2.9	6.28	145	143	44.7	5.23	18	26.1	87
number1213	Female	41	58.6	158.5	23.3259	2.12	7.22	117	187	44.9	4.87	16.6	8.4	74
number1214	Female	58	51.7	163.5	19.3399	4.28	5.07	141	221	45.2	5.44	10.3	16.4	59
number1215	Male	61	86.2	163	32.4438	2.92	5.78	158	292	46.1	7.74	10	32.8	59
number1216	Male	55	72.1	162	27.4729	3.12	5.17	159	132	45.5	5.8	15.2	24.8	80
number1217	Male	49	69.8	157.5	28.1381	3.59	7.88	158	116	45.9	4.66	26.7	65.6	121
number1218	Female	42	42.7	159	16.8902	2.14	6.47	117	226	46	3.9	7.2	11.4	41
number1219	Female	55	67.5	160.5	26.2032	3.61	5.23	144	269	42.8	5.94	11.9	34.9	71
number1220	Male	41	59.7	160	23.3203	3.89	8.28	147	241	44.2	5.73	7.9	13	84
number1221	Male	52	63.3	170.5	21.7748	3.33	10.17	156	219	44.3	5.06	14.4	28.1	82
number1222	Male	77	62.2	171	21.2715	2.37	4.56	132	200	44.4	5.06	27.8	11.5	61
number1223	Female	55	65.9	162	25.1105	2.32	6.85	127	222	45.7	5.35	9.5	39.2	60
number1224	Male	54	70.9	166.5	25.5751	2.56	6.16	143	320	44.8	5.48	19.9	66.2	99
number1225	Male	64	59.3	165	21.7815	2.04	3.05	147	168	46.6	5.01	17.7	16.6	43
number1226	Female	59	74.4	165	27.3278	4.18	3.7	127	148	43.2	5.22	17.1	12	77
number1227	Female	55	67.4	162.5	25.5243	1.92	3.38	132	180	45.7	5.79	13	11.4	75
number1228	Male	59	61.3	168.5	21.5904	3.52	4.54	149	265	46.2	5.3	10.8	24.6	60
number1229	Male	50	76.3	164	28.3685	8.77	6.2	151	245	44	6.17	17.4	24.3	66
number1230	Female	39	51	158.5	20.3007	2.89	5.37	131	265	46.9	4.65	26.9	12.7	45
number1231	Male	62	70.9	173.5	23.5531	1.81	6.67	156	240	49.8	8.43	23.1	19	55
number1232	Male	80	66.1	165	24.2792	3.6	6.4	146	295	42.8	5.8	13	11	50
number1233	Male	74	50	178	15.7808	2.6	5.48	156	244	47.1	5.39	41.5	13.8	67
number1234	Male	83	70.4	170	24.3599	3.34	8.1	136	269	40.7	5.79	15.6	22.9	53
number1235	Male	87	64	166	23.2254	1.99	8.02	139	222	41.6	9.24	21.3	43.5	55
number1236	Male	82	77.5	171.5	26.3496	4.5	5.79	142	177	42.2	5.97	18	23	69
number1237	Female	46	52.2	149.5	23.3554	2.59	6.49	140	235	48	5.19	9.2	15.6	78
number1238	Female	38	61.4	154	25.8897	5.07	7.19	145	284	46	4.83	9.7	14.1	55
number1239	Male	63	61.6	165	22.6263	3.47	9.55	171	273	45.3	6.19	8.9	15.6	100
number1240	Male	78	59.9	163	22.5451	3.84	5.5	153	126	44.1	8.26	17.4	41.9	104
number1241	Male	79	65.5	161	25.2691	2.64	5.12	137	105	39.5	6.38	13.8	18	84
number1242	Male	45	66.6	166.5	24.024	7.42	4.3	146	191	44.2	5.63	14.2	23	76
number1243	Male	48	64.6	164	24.0184	3.16	4.49	144	203	42.9	5.13	15.4	21.6	57
number1244	Male	63	80.2	182	24.2121	1.63	4.94	146	185	41.9	6.25	23.7	16.2	56
number1245	Male	72	67.3	167.5	23.9875	3.15	7.03	159	225	45	5.81	18.8	21.8	98
number1246	Male	55	54.8	167	19.6493	4.08	4.49	126	156	42.2	5.76	31.9	17.7	68
number1247	Male	41	70	180	21.6049	3.55	7.38	161	239	49.4	5.47	22.8	11.5	72
number1248	Male	62	81.7	176	26.3753	2.42	8.09	147	219	43.3	5.35	11.8	20.1	60
number1249	Male	38	76.3	171.5	25.9416	1.9	5.75	144	173	44.5	5.18	30.6	37.4	107
number1250	Female	56	58.3	169	20.4125	1.74	5.7	121	224	42.6	5.1	10.1	12.2	67
number1251	Male	58	79.7	173	26.6297	4.14	7.32	158	228	44.3	6.68	8	17	102
number1252	Male	47	76.4	182	23.0648	3.81	5.6	146	188	44.6	5.29	16.4	28.3	71
number1253	Male	50	78	176	25.1808	1.87	5.72	128	146	39.8	3.69	15.8	62.4	92
number1254	Female	48	53.2	157.5	21.4462	2.33	3.04	117	212	40.3	4.54	13	10.8	47
number1255	Male	51	73.2	165	26.8871	4.08	6.03	150	200	43.7	4.82	19.7	23.2	79
number1256	Male	53	65.8	166	23.8786	2.21	5.36	151	133	41.5	11.51	10.5	102.7	82
number1257	Male	55	69.2	161.5	26.5315	1.95	6.23	149	190	44.8	5.04	15	28.7	93
number1258	Male	85	61.9	170.5	21.2932	1.42	8.87	142	179	43.2	6.54	26.2	15.5	114
number1259	Female	60	89.9	170	31.1073	1.95	6.71	141	260	42.9	5.17	23.4	29.6	105
number1260	Male	53	74.6	171.5	25.3636	8.55	6.17	151	163	43.9	4.63	17.2	24.5	57
number1261	Male	55	69.6	163.5	26.036	2.78	8.81	156	259	45.7	7.29	10.9	20	87
number1262	Female	60	50.9	161.5	19.5152	4.04	5.55	125	139	45.4	4.67	12.7	11.5	133
number1263	Male	64	69.9	170.5	24.0452	2.04	4.81	138	183	45	4.83	32.7	9.3	69
number1264	Male	53	75.4	165.5	27.528	2.91	6.68	143	210	43.2	4.62	14.1	21.6	51
number1265	Male	63	73	165.5	26.6518	1.9	4.16	136	195	47.1	7.34	14.1	61.4	49
number1266	Female	48	75.6	159	29.9039	4.72	6.99	121	215	44.3	4.74	18.5	16.9	60
number1267	Female	44	62.9	161	24.266	1.02	7.66	113	296	41.9	4.55	11.6	24.3	60
number1268	Male	39	63.6	164.5	23.5031	3.54	5.63	162	202	46.2	4.53	26.1	26.8	55
number1269	Female	58	54.4	164.5	20.1033	2.16	6.39	125	279	41.7	4.88	17.7	15.5	95
number1270	Male	47	84.3	171	28.8294	4.73	7.15	155	168	46	5	9.9	47.5	56
number1271	Male	42	65.3	166.5	23.5551	1.3	5.79	152	181	45.4	5.19	13	22.1	96
number1272	Male	61	78.7	174	25.9942	5.47	5.71	151	186	45.3	5.19	13.2	16.1	65
number1273	Male	51	71.4	162.5	27.0391	1.32	5.92	154	272	44.2	6.34	15.9	25.5	89
number1274	Male	66	55.3	161.5	21.2022	3.11	5.16	146	163	44	5.12	26.9	11.1	56
number1275	Male	70	70.7	167.5	25.1994	4.08	4.76	136	266	41.7	4.67	11.8	20	43
number1276	Female	76	57.8	146.5	26.931	3.25	5.22	145	152	46.5	5.8	8.6	32	60
number1277	Male	37	58.8	172.5	19.7606	3.53	7.79	160	278	51	4.67	19.8	39.7	91
number1278	Female	38	63.9	160	24.9609	3.68	8.5	131	199	46.2	4.16	21.2	39.6	83
number1279	Male	49	64.8	164.5	23.9466	1.72	4.18	156	227	44.9	5.29	11.6	26.2	114
number1280	Male	47	64.5	171.5	21.9296	3.67	6.19	143	235	45.2	5.48	20.1	28.7	77
number1281	Male	57	72.3	173.5	24.0181	2.35	7.14	150	128	45.2	4.99	17.4	34.1	62
number1282	Male	57	76.2	167.5	27.1597	6.11	5.53	130	198	42.7	4.79	12.4	16.3	60
number1283	Male	52	66.3	166	24.0601	7.63	6.06	159	226	46.7	5.45	10.2	25.5	83
number1284	Male	41	69.6	169	24.3689	2.72	8.41	172	205	47	5.15	20.3	49.9	73
number1285	Male	61	81.9	166.5	29.5431	2.49	7.12	157	198	43.2	4.95	20.7	20.8	76
number1286	Male	40	71.9	168	25.4748	6.32	5.5	136	191	46	5.6	13.4	23.7	79
number1287	Male	49	77.6	174	25.6309	4.58	4.94	149	171	44.9	6.51	15.2	46.2	86
number1288	Male	53	83	183.5	24.6494	3.51	5.34	137	201	44.1	7.09	22.1	20.3	50
number1289	Female	46	57.1	154	24.0766	3.77	5.94	118	229	44.9	4.38	9.6	23.9	47
number1290	Male	56	82.8	175.5	26.8829	4.37	6.28	154	220	44.8	4.76	14.7	27.8	81
number1291	Male	57	70.6	165.5	25.7756	2.88	5.78	143	230	40.7	7.3	24.2	18.4	68
number1292	Male	64	81.5	174.5	26.765	3.02	6.2	151	261	43.5	5.02	18.2	18.9	101
number1293	Male	45	72.9	167	26.1393	1.15	5.02	139	152	44.8	5.33	14.1	13	91
number1294	Male	50	63.7	170.5	21.9124	2.85	5.84	153	232	41.1	4.9	10.7	9.2	81
number1295	Male	38	72.2	168	25.5811	1.21	6.22	154	192	44.2	3.96	13	45.6	89
number1296	Male	57	56.8	165	20.8632	3.36	4.16	153	205	44.7	5.23	21.2	20.9	58
number1297	Male	59	68.5	164.5	25.3139	5.53	4.6	145	100	44.4	4.56	12.4	46.8	79
number1298	Male	62	81	173.5	26.9083	4.04	5.76	147	285	42.1	4.59	20.5	13.8	53
number1299	Male	36	80.3	171.5	27.3015	5.28	8.02	151	211	44.7	4.11	18.3	14.8	54
number1300	Male	55	66.9	179	20.8795	2.53	6.64	157	195	46.3	5.26	17.3	35.7	68
number1301	Male	41	73.8	166.5	26.6212	4.1	9.03	154	246	45.3	6.36	10.6	12.1	64
number1302	Female	67	68.5	157.5	27.614	4.07	6.07	149	236	45.9	4.94	20	25.7	62
number1303	Female	63	52	156	21.3675	2.83	5.55	141	214	45.7	6.03	20	32.8	76
number1304	Female	52	46.5	154.5	19.4803	2.7	4.21	131	203	44.3	4.29	12.6	16.9	58
number1305	Male	59	65.2	169	22.8283	3.28	4.07	138	159	44.4	4.66	10.5	27.7	77
number1306	Male	54	69.2	169.5	24.0861	4.21	5.81	153	255	46	5.23	13.6	11.9	84
number1307	Male	55	71.8	168	25.4393	4.25	9.86	150	188	45.3	4.96	9.6	41.6	110
number1308	Female	38	62.1	162	23.6626	3.39	6.46	133	229	48.1	4.81	10.8	22.3	57
number1309	Male	50	71.7	167	25.7091	2.68	7.63	133	117	44	4.31	16.7	31	65
number1310	Male	45	62	166.5	22.3647	2.63	5.62	157	231	44.5	4.4	17.4	18.1	54
number1311	Male	83	63.6	167	22.8047	4.99	5.43	125	287	46.2	6.58	26.7	23.2	62
number1312	Male	56	59.5	160.5	23.0976	4.47	3.53	155	189	43.3	4.65	10.1	15.3	57
number1313	Male	46	76.2	183.5	22.6299	3.57	6.5	153	285	47	5.12	22.5	16.2	71
number1314	Male	56	64.6	168	22.8883	4.19	7.95	140	253	44.2	4.81	12.7	26	78
number1315	Male	59	68.1	171.5	23.1536	1.98	6.46	147	192	43.7	4.86	8.2	94.8	86
number1316	Female	46	54	154.5	22.6223	6.29	7.07	125	532	43	4.96	22.4	15.5	98
number1317	Male	75	62	172.5	20.836	2.71	7.27	141	233	44.4	11.46	13.4	21.6	83
number1318	Male	75	56.2	155	23.3923	3.25	5.78	148	215	42.9	6.32	33.5	13.8	57
number1319	Male	57	60.7	163.5	22.7067	2.14	4.45	160	230	44.8	4.65	19.4	22.8	72
number1320	Male	44	86	171	29.4108	4.74	4.07	148	145	46	5.22	21.2	18.4	89
number1321	Male	60	64.4	160.5	24.9998	2.05	4.74	164	170	43.4	5.31	23.1	16.4	128
number1322	Male	56	71.9	168	25.4748	3.86	5.91	141	294	43.7	5.78	11.8	13.1	72
number1323	Male	53	75.4	170	26.09	2.6	7.59	154	211	44.7	5.46	17.2	19.8	66
number1324	Male	42	70.8	169.5	24.643	1.98	5.51	158	251	46	5.21	15.6	37.3	63
number1325	Male	46	79.2	174	26.1593	4.35	4.95	150	179	47.3	4.94	21.9	103.3	82
number1326	Female	57	55.6	166	20.1771	2.36	7.05	125	216	41.5	4.72	13.4	10.3	70
number1327	Female	43	52.8	151	23.1569	1.49	6.89	127	271	41.5	3.92	14.6	10	49
number1328	Female	41	57.8	170	20	4.9	4.82	127	287	46.2	5.2	21.1	21.5	46
number1329	Female	51	49.8	161	19.2122	6.14	6.22	143	268	45.5	4.77	22.6	17.7	56
number1330	Male	62	58.7	164	21.8248	2.05	4.49	139	119	44	6.69	14.8	16.7	72
number1331	Male	66	74.9	174.5	24.5975	3.65	6.35	148	275	43.3	5.42	13.8	16.3	75
number1332	Male	59	84	174.5	27.586	3.77	8.22	166	263	39.7	12.09	48.8	34.3	109
number1333	Male	43	56.4	162	21.4906	3.27	6.3	158	180	48	4.78	11.8	22.1	84
number1334	Female	42	49.1	156	20.1759	4.21	6.05	125	204	42.7	5.55	12.1	10	63
number1335	Female	50	56.9	159	22.507	3.17	7.08	124	217	40.4	4.67	22.8	9.6	60
number1336	Male	56	76.3	169	26.7148	2.39	6.05	147	189	47.4	5.46	18.9	17.7	79
number1337	Female	55	66	168	23.3844	2.2	4.96	118	165	44.1	4.6	8.2	17.9	83
number1338	Male	81	55.1	159	21.795	2.24	7.5	134	226	41.4	11.4	19.4	10.5	115
number1339	Male	41	83.9	179	26.1852	5.39	7.29	156	270	42.9	4.53	19	29.7	66
number1340	Male	57	91.5	178	28.8789	4.05	11.18	165	193	45.4	4.48	26.8	29.5	64
number1341	Male	58	85.3	165.5	31.1425	4.92	8.03	149	186	41.7	5.78	9.7	14.7	94
number1342	Male	67	76.3	178	24.0816	2.01	6.67	159	222	46.7	5.02	31.8	36.6	57
number1343	Male	56	53.7	160	20.9766	3.36	5.2	145	156	41	4.56	17.4	25.4	56
number1344	Male	41	80.1	175	26.1551	3.38	6.74	141	316	47.7	5.63	15.9	55	75
number1345	Female	48	58.1	158	23.2735	2.72	5.54	128	133	42.8	4.48	8.7	19.8	86
number1346	Male	52	69.4	164	25.8031	6.47	5.11	162	127	40.5	4.04	15.9	104.5	125
number1347	Female	56	66.4	157.5	26.7674	5.01	6.38	145	144	45.3	7.18	12.4	139.7	133
number1348	Male	55	63.2	163	23.7871	7.4	6.86	147	134	46.7	4.82	14.3	50.5	84
number1349	Male	44	59.3	159.5	23.3095	2.29	5.04	123	246	42.7	4.86	18.4	29.5	105
number1350	Male	53	87.4	181	26.6781	4.02	6.42	160	249	42.3	5.02	13.9	17.6	67
number1351	Male	43	61.9	167	22.1951	6.94	7.19	164	237	46.9	4.72	15.5	19.7	84
number1352	Male	43	87.6	174	28.9338	3.21	7	148	185	42.6	5.17	8.9	24.7	62
number1353	Male	45	71.8	164	26.6954	2.15	7.09	157	152	46.9	4.87	24.8	75.7	94
number1354	Male	35	67.5	178	21.3041	10.26	6.52	140	299	46.8	4.65	23.5	16.4	66
number1355	Female	44	42.9	143	20.979	2.33	5.94	130	161	41.8	4.68	15.3	10.5	53
number1356	Female	40	51.4	149	23.1521	3.2	6.35	121	318	42.5	4.87	22.1	11.7	60
number1357	Male	30	59.7	168	21.1522	1.88	6.01	156	260	48.2	4.94	13.3	34.5	58
number1358	Male	54	72.6	170	25.1211	2.83	5.4	139	182	39.6	5.28	17.4	14	97
number1359	Female	44	58.8	154.5	24.6332	2.5	5.86	127	296	43.8	5.07	10.9	13.1	63
number1360	Male	36	79.9	172.5	26.8515	4.16	7.49	157	306	47.9	4.16	29.7	22.9	74
number1361	Male	48	82.4	169.5	28.6806	4.06	7.87	163	231	41.5	5.31	18.8	39.6	49
number1362	Male	45	98	169	34.3125	3.67	5.45	148	204	42.3	6.11	15.3	48	89
number1363	Female	48	60.4	171	20.6559	1.76	6.05	132	204	42.9	3.98	27.1	6.4	45
number1364	Male	86	63.8	164	23.721	3.17	6.24	123	222	42.1	7.42	14.9	85.6	88
number1365	Female	43	53.9	154.5	22.5804	3.84	6.65	129	153	44.2	5.09	12.2	11.4	68
number1366	Male	58	86.5	178	27.3008	1.39	7.34	170	212	41.7	4.54	18.7	31.2	64
number1367	Male	41	74.3	174.5	24.4005	2.71	5.95	150	166	41.3	8.03	12	24.8	68
number1368	Male	54	107.4	174.5	35.2706	3.29	4.33	151	191	40.1	5.13	11.8	78	80
number1369	Female	45	55.1	160	21.5234	1.71	7.73	131	235	43.6	4.83	11.3	16	76
number1370	Male	43	87.4	174.5	28.7026	3.41	5.1	142	198	43.3	5.74	12.5	73.2	84
number1371	Male	47	76.4	169.5	26.5922	2.94	4.44	141	180	45.2	5.82	11.8	20.8	51
number1372	Male	45	65.1	168	23.0655	2.63	6.78	152	182	43.5	4.86	9.4	20.8	95
number1373	Female	57	56.6	149.5	25.3241	4.32	5.07	135	308	44.7	5.03	10.6	17.3	89
number1374	Male	38	71.2	169.5	24.7822	2.66	5.67	160	256	43.6	4.71	22.6	27.9	66
number1375	Male	81	76.8	171	26.2645	2.01	6.36	125	243	43.2	6.48	13	21.2	46
number1376	Female	41	55.7	154.5	23.3345	2	7.85	127	138	41.7	5.08	14.8	16.3	50
number1377	Female	51	63.1	166.5	22.7615	2.82	6.8	145	247	41.5	5.05	11.3	15.7	64
number1378	Male	52	86.5	176	27.9248	2.27	6.62	169	219	44.2	8.23	20.5	58.8	67
number1379	Male	50	70.5	165	25.8953	2.75	6.57	154	294	44.7	5.07	14.7	9.8	65
number1380	Male	60	83.1	172.5	27.9269	5.89	6.04	167	254	44.8	5.22	18.7	23	88
number1381	Male	57	67.3	163.5	25.1756	1.98	7.22	154	224	48.7	5.51	34.9	26.5	80
number1382	Male	53	90.5	179	28.2451	2.31	6.39	152	227	44	5.18	21.5	20.2	66
number1383	Male	50	59.2	163.5	22.1455	3.41	6.65	154	285	44.4	4.71	33.1	34.9	73
number1384	Male	60	59.3	169	20.7626	1.8	4.92	166	150	42.6	5.47	23.2	20.9	96
number1385	Female	52	55.9	154	23.5706	3.22	4.79	119	257	43.2	5.1	12.3	14.2	79
number1386	Male	59	63	168.5	22.1892	3.56	5.9	146	271	42.7	6.07	11.9	21.5	103
number1387	Male	57	73.1	167	26.2111	4.82	4.1	162	226	45.6	4.96	28.3	30.6	100
number1388	Male	57	75.5	171.5	25.6696	4.87	6.02	151	183	47.2	6.18	30.2	25.2	50
number1389	Male	95	80.7	177.5	25.614	1.63	5.26	128	207	37.2	4.96	18.9	12.7	70
number1390	Male	87	73	168	25.8645	2.9	6.57	150	213	42.7	7.22	12.9	15.1	43
number1391	Male	78	79.5	164.5	29.3789	3.21	4.61	156	144	39.7	4.72	30	16.9	69
number1392	Male	86	78.2	165.5	28.5503	3.51	8.67	134	230	43.7	6.4	15.3	13.4	66
number1393	Male	82	64.4	165.5	23.512	1.88	3.97	127	202	41.3	5.36	10.6	16.8	66
number1394	Male	66	74.2	174.5	24.3676	2.67	6.04	146	233	41.2	4.85	13.3	19.4	66
number1395	Male	78	60.2	161	23.2244	3.4	6.33	150	175	42.9	5.48	19.1	33.3	57
number1396	Male	76	60.5	152	26.1859	1.51	9.91	149	183	44	7.19	14.6	16.2	71
number1397	Male	64	71.9	169.5	25.0259	1.11	2.93	136	163	43.1	5.53	21.9	25	217
number1398	Male	63	81	166.5	29.2184	4.19	5.03	144	232	38.7	4.74	14.8	13.6	106
number1399	Male	67	73.4	173	24.5247	3.6	5.41	152	206	45.2	5.05	15.9	22.4	70
number1400	Male	71	53.9	159	21.3204	4.09	6.13	153	213	45.1	5.6	28.7	29.4	74
number1401	Male	63	69.2	166	25.1125	3.09	6.46	170	228	48.5	9.08	17.6	22.3	91
number1402	Male	58	75.9	169	26.5747	1.99	5.99	169	162	46.2	5.17	30.8	26.8	81
number1403	Male	65	71.6	172.5	24.0622	1.79	5.16	141	176	48.7	5.99	26.7	7.8	81
number1404	Male	61	69.8	161	26.928	1.67	7.01	139	90	46.7	6.4	10.2	20.7	74
number1405	Male	86	63.6	168.5	22.4005	1.37	5.72	146	125	41.8	7.28	18.8	26.2	142
number1406	Male	69	65.3	176	21.0808	2.69	5.68	139	173	40.8	4.9	14.7	12.9	63
number1407	Male	63	57.1	167.5	20.352	1.88	5.94	164	139	42.1	5.22	13.4	15.6	93
number1408	Male	67	71.2	174	23.517	3.02	6.28	152	229	42.1	5.14	11.8	79.7	111
number1409	Male	65	86.8	170	30.0346	2.2	7.41	156	189	44.1	5.24	9.7	16	56
number1410	Female	39	63.5	162	24.196	2.55	5.71	122	238	41.8	4.91	8.7	13.6	53
number1411	Male	68	55.5	169	19.4321	1.68	2.94	149	167	39.6	5.39	14.4	14.1	57
number1412	Male	69	62.3	159	24.643	1.35	6.31	145	256	43.2	4.66	15.8	16.7	108
number1413	Male	65	73.5	174	24.2767	3.23	5.65	147	176	37.4	4.24	12.8	15.7	42
number1414	Female	65	45.4	156	18.6555	3.64	6.87	120	286	42.7	7.88	10.3	16.4	78
number1415	Male	71	72	170	24.9135	2.02	7.3	151	214	43.2	5.54	21.7	15.8	61
number1416	Male	67	87.9	176	28.3768	1.59	4.37	141	141	42.1	7.45	34.3	26.8	59
number1417	Male	62	76.3	171.5	25.9416	3.6	6.85	160	197	40.8	4.92	31.7	15.9	78
number1418	Male	66	69.9	162.5	26.471	4.13	7.2	154	180	45.9	5.8	24.1	12.3	77
number1419	Male	66	69.1	163.5	25.8489	3.35	7.86	151	256	42.6	8.76	12.9	19.9	83
number1420	Male	60	64	163	24.0882	1.98	6.4	158	211	41.2	4.5	14	18.4	64
number1421	Male	76	56.7	157.5	22.8571	3.24	5.49	145	173	41.2	5.89	29	15.8	60
number1422	Male	65	67	161	25.8478	3.97	4.21	137	261	42.9	4.72	9.3	31.1	76
number1423	Male	70	49.5	156	20.3402	3.43	7.55	149	131	44.6	4.48	24.3	9.1	84
number1424	Female	68	56.5	157	22.9218	2.95	6.68	124	228	40.4	5.05	8.5	13.3	80
number1425	Female	56	49.4	154.5	20.6952	2.68	4.23	129	181	39.3	4.69	8	14.8	77
number1426	Male	60	68.1	171	23.2892	1.55	4.82	138	245	41.7	4.91	17.7	15.2	87
number1427	Male	61	68.1	165	25.0138	2.44	8.26	157	224	44.9	5.14	20.5	55.4	83
number1428	Male	73	74.4	175.5	24.1556	4.51	5.61	146	225	44.8	6.73	20.8	13.4	99
number1429	Male	84	48.8	156	20.0526	4.2	7.93	136	170	39.4	5.37	12.3	5.5	50
number1430	Female	64	60.3	161	23.263	2.17	7.57	140	288	45.3	5.44	13	13.9	75
number1431	Male	79	50.8	163	19.12	2.53	2.61	149	87	39.5	5.52	11.6	21.5	65
number1432	Male	65	59	166	21.4109	1.81	2.68	144	157	43.1	4.96	15.3	25.2	50
number1433	Male	64	63.6	171	21.7503	2.47	6.99	152	160	43.6	7.33	15	32.4	88
number1434	Male	75	71	174.5	23.3167	5.99	5.5	154	145	42.5	5.47	22.8	22.9	55
number1435	Male	61	80.7	175	26.351	1.58	9.4	148	185	43.6	4.54	15.8	12	94
number1436	Male	69	77	175	25.1429	2.28	9.42	152	212	43.4	6.51	24.9	26.2	97
number1437	Male	63	82.2	180	25.3704	2.67	4.1	150	237	41.6	4.7	26.4	13.3	58
number1438	Female	56	46.5	156	19.1075	3.08	3.66	140	112	43.9	4.35	18.4	25	79
number1439	Male	63	79.6	176	25.6973	2.51	9.92	157	220	42.6	4.76	15.2	17.7	62
number1440	Male	80	62.3	162	23.7388	3.17	6.03	133	210	42.9	5.01	18.1	18	64
number1441	Male	78	60.9	172.5	20.4663	1.91	5.9	131	209	43.1	5.03	28.5	31.2	70
number1442	Male	77	73.8	173.5	24.5164	2.09	6.16	142	148	43.2	6.7	7.3	14	79
number1443	Male	71	69.7	169	24.4039	3.48	4.28	135	254	41.3	4.88	12.2	20.8	38
number1444	Male	60	66.6	166.5	24.024	2.71	7.64	142	247	44.2	7.42	13.5	15.3	82
number1445	Male	80	68.8	164	25.58	3.83	6.28	158	153	47.4	7.46	21.8	28.5	64
number1446	Male	79	59.2	162	22.5575	4.11	4.86	158	120	43.9	10.22	16.3	32.7	121
number1447	Male	65	71.3	175.5	23.1492	2.39	6.24	155	351	52	10.65	22.6	31.7	66
number1448	Female	68	72.4	158.5	28.8191	3.93	6.35	148	227	45.4	5.41	11.3	51	67
number1449	Male	65	68.3	167.5	24.344	3.25	8.08	142	367	44.4	6.24	17.8	16	59
number1450	Male	62	68	180	20.9877	3.76	6.2	143	213	45.3	5.19	14.4	11.7	69
number1451	Male	62	81.6	166.5	29.4348	2.4	7.19	164	208	42.6	4.59	31.4	25	85
number1452	Male	65	82.6	174.5	27.1262	2.69	5.89	156	259	44.2	5.66	25.9	14.2	105
number1453	Male	63	70	172	23.6614	1.7	4.47	152	178	45.9	8.66	18.8	15.3	58
number1454	Male	60	84.5	173	28.2335	3.87	10.32	171	244	42.8	12.98	42.4	23.6	107
number1455	Male	69	82.2	176	26.5367	3.04	7.38	157	230	45.5	6.92	18.7	15.8	126
number1456	Male	68	66.2	160.5	25.6985	4.07	6.41	158	179	44.1	6.41	23.2	35.3	94
number1457	Male	75	41.1	176.5	13.1933	2.45	4.96	155	201	46.3	4.96	34.3	12.9	67
number1458	Male	87	65.2	166.5	23.519	3.96	3.72	135	120	43.4	6.11	13	33.9	84
number1459	Male	84	67.9	167	24.3465	4.14	6	110	215	46.2	6.81	26.7	37.6	49
number1460	Male	73	67.4	168	23.8804	2.54	5.97	152	209	42.3	4.98	22.7	19.4	95
number1461	Male	65	78.9	169	27.6251	2.06	6.99	163	186	47.5	7.97	19.4	26	90
number1462	Male	84	58.8	161.5	22.5441	2.97	7.16	131	330	41.4	9.87	23.9	12.4	61
number1463	Male	88	59.8	165.5	21.8326	1.91	7.6	138	231	40.7	10.16	21.6	13.9	62
number1464	Male	76	57.7	172	19.5038	2.45	6.91	132	222	43.9	6.11	12.3	21.6	72
number1465	Male	64	63.9	164.5	23.614	3.46	8.88	161	246	44.1	5.76	11.7	38.1	117
number1466	Male	83	79.9	168	28.3092	4.6	6.56	154	169	42.1	5.11	19.7	19	76
number1467	Female	84	47.2	147	21.8428	1.98	6.38	124	215	37.9	7.35	11.2	8.8	91
number1468	Male	65	66.1	167	23.7011	1.99	6.24	141	243	44	7.38	11.9	23.6	82
number1469	Male	64	82.8	180	25.5556	1.43	4.7	154	175	40.2	5.4	21.4	15.3	62
number1470	Male	62	90.6	180	27.963	1.97	6.93	164	185	45	4.97	34.1	17.9	65
number1471	Male	63	77.5	166	28.1245	2.77	8.63	145	186	41.3	4.88	12.1	26.2	46
number1472	Male	62	66.3	161	25.5777	3.24	7.3	163	196	46	5.7	14.6	41.9	78
number1473	Male	64	77.5	163.5	28.9912	6.06	4.26	154	185	44.9	8.15	15.4	28.1	80
number1474	Male	74	70.9	166.5	25.5751	3.58	5.23	148	218	43.6	4.83	12.5	11.3	89
number1475	Female	64	73.7	172	24.9121	4.42	4.77	130	170	43.8	5.14	13.8	14.8	91
number1476	Male	65	87.7	184.5	25.7636	6.3	6.66	149	186	39.3	6.38	20.3	23.8	72
number1477	Female	76	45.6	152	19.7368	2.22	7.85	112	170	45.1	7.28	15.3	18.2	84
number1478	Female	65	60.3	164	22.4197	2.78	5.09	139	267	48.3	5.26	16	11.1	92
number1479	Male	78	62.2	163	23.4107	3.42	4.78	150	259	42.5	5.68	27.6	16.4	98
number1480	Male	65	61.5	160.5	23.874	7.38	7.54	148	239	42.7	5.97	12.8	17.6	85
number1481	Female	56	66.7	159	26.3835	2.24	5.49	139	230	45.7	4.5	12.9	18.2	85
number1482	Female	59	60.7	164	22.5684	3.43	6.02	144	230	45.3	5.36	15.2	14.7	89
number1483	Male	68	70.5	170.5	24.2516	2.45	3.74	154	229	47	5.77	25.3	11.9	69
number1484	Male	67	54.5	161.5	20.8954	3.32	5.06	149	154	43.8	4.94	20.7	13.2	62
number1485	Female	60	77.1	165.5	28.1487	5.19	4.22	139	203	46	5.39	18.1	29.1	104
number1486	Female	77	56.5	146	26.5059	2.84	5.1	148	158	46.8	5.33	16.6	19.4	62
number1487	Male	75	69.1	168	24.4827	1.97	6.49	147	201	44.8	4.6	14.1	31.1	96
number1488	Male	67	58.7	157.5	23.6634	3.82	6.42	165	204	47.5	4.95	21.6	37.3	60
number1489	Male	82	74.8	166.5	26.9819	2.7	8.79	161	203	44.2	5.69	17.9	30.7	83
number1490	Male	60	64.3	162.5	24.3503	4.5	4.18	157	227	46.1	5.19	17.8	15.6	54
number1491	Male	82	80	171.5	27.1996	3.55	6.79	135	191	43.6	5.85	12.7	14.3	50
number1492	Male	40	77.1	174	25.4657	2.7	5.36	159	253	49.1	5.05	16.8	14.7	42
number1493	Male	63	58.4	160	22.8125	2.7	5.62	149	212	46.3	4.82	19.4	28.8	59
number1494	Male	63	58.5	164	21.7504	1.54	4.63	143	223	43.3	7.44	14.1	12.4	53
number1495	Female	59	56	171	19.1512	2.24	3.66	123	219	40.7	4.38	15	27.2	107
number1496	Female	64	55	156.5	22.4561	3.98	5.82	143	209	44.9	6.29	24.1	21.4	78
number1497	Male	64	59.7	166	21.665	1.16	5.71	151	192	42.7	5.03	15.7	12.2	80
number1498	Male	63	79.3	161.5	30.4038	1.99	5.5	145	207	46.5	6.62	15.6	42.3	83
number1499	Male	61	51.3	166	18.6166	6.47	5.45	154	209	43.5	4.52	17	17.5	58
number1500	Female	57	56.1	161	21.6427	3.66	4.54	115	182	41.6	4.8	22.8	13.2	53
number1501	Male	56	82.7	180	25.5247	3.37	5.54	148	164	42.1	5.43	7.8	12.2	82
number1502	Female	59	60.6	163	22.8085	2.54	4.32	141	209	41.7	5.93	13	25	55
number1503	Male	59	68.2	170.5	23.4604	2.63	5.74	126	183	42.2	8.17	14.9	24.8	65
number1504	Male	42	80.5	166.5	29.038	3.88	6.03	156	198	43.3	6.02	11.8	12.3	66
number1505	Female	57	53	156	21.7784	2.5	5.49	139	187	38.7	4.56	14.4	14.4	58
number1506	Male	59	68	164	25.2826	1.94	4.64	153	147	44.2	5.67	16	15.2	68
number1507	Male	59	66.3	162.5	25.1077	1.85	4.59	151	193	42.7	7	18.8	32.2	69
number1508	Male	54	76.7	170	26.5398	2.25	7.85	155	206	40.9	5.57	16.4	14.4	64
number1509	Female	57	57.1	158.5	22.7289	1.31	5.77	124	256	41.9	5.51	7.6	13.9	88
number1510	Female	46	60.5	161.5	23.1959	2.61	6.25	141	267	43.6	6.07	21.3	30	54
number1511	Female	49	54.1	156	22.2304	2.7	3.2	125	203	39.3	5.03	13.4	9.8	53
number1512	Male	41	82.3	174.5	27.0277	1.62	7.3	158	266	44	7.26	8.9	65.4	112
number1513	Female	59	48.5	163	18.2544	3.69	4.34	142	170	46.3	5.09	12.4	15.7	61
number1514	Male	48	67.4	172.5	22.6507	3.74	4.4	172	162	46.2	7.01	28.5	32.6	114
number1515	Male	45	89.9	171.5	30.5655	5.87	4.88	151	178	44.5	4.88	24.6	47.3	88
number1516	Male	40	76.1	176.5	24.4284	3.54	6.14	157	144	44.5	4.51	17.9	54.1	69
number1517	Male	57	74.1	168	26.2543	2.24	5.62	134	296	46.4	8.76	10.6	23.5	38
number1518	Male	52	73.7	171	25.2043	2.26	3.62	144	171	47.3	6.91	17.1	8	69
number1519	Male	43	80.8	169.5	28.1237	1.26	5.01	156	225	45	5.5	13.5	38.8	78
number1520	Female	56	64.9	167	23.2708	3.1	3.7	149	173	45.7	6.08	12.2	12	87
number1521	Male	42	60.4	161	23.3016	3.31	8.71	149	212	43.2	5.28	13.9	8.8	96
number1522	Male	35	110.6	185	32.3156	1.56	8.01	172	188	47	5.38	9.6	41.5	68
number1523	Male	40	74.8	178	23.6081	3.57	6.26	154	254	45.8	5.17	23.8	15.8	97
number1524	Female	41	53.6	148.5	24.3059	2.83	6.5	120	363	42	4.82	15.5	15.2	53
number1525	Male	42	70.3	171.5	23.9016	2.63	4.85	149	166	45.9	5.12	16.2	15.2	55
number1526	Male	54	73.8	169.5	25.6872	4.77	5.98	167	248	42.6	4.95	11.6	17.4	83
number1527	Male	45	59.4	160	23.2031	2.1	4.09	128	260	43.1	5	14.7	24.3	113
number1528	Male	42	82.6	179.5	25.6361	3.18	7.19	169	312	44.7	4.69	20	33.8	78
number1529	Male	58	70.3	166.5	25.3587	3.26	7.19	149	200	44	5.14	16.2	47.4	70
number1530	Male	51	75.4	170.5	25.9372	2.02	5.18	155	200	43.3	5.17	28.6	19.4	85
number1531	Female	55	56.2	163	21.1525	3.38	4.96	133	103	42	5.12	18.2	22.8	62
number1532	Male	62	78	174	25.763	4.43	4.94	146	145	43.8	5.61	14.8	27.4	72
number1533	Male	37	70.2	170.5	24.1484	3.15	5.82	160	302	44.5	5.39	11.2	56.6	98
number1534	Female	47	56.8	153	24.2642	4.26	5.74	120	241	48.1	4.65	15.2	11.1	53
number1535	Male	34	95.4	186.5	27.4278	2.41	6.3	169	261	46.3	4.96	23.3	21.6	99
number1536	Male	44	73.6	167.5	26.233	1.82	4.8	147	167	42.2	5.63	10.5	17.5	82
number1537	Female	39	63.8	160	24.9219	4.09	7.32	132	251	45.6	4.61	20.2	15.1	75
number1538	Male	57	65.7	160.5	25.5044	2.9	5.43	147	258	41.5	6.18	10.3	8.9	80
number1539	Male	54	71.1	167	25.4939	1.84	7.82	164	148	43	4.94	27.6	15.6	79
number1540	Male	37	81	171.5	27.5395	5.24	6.86	143	213	46.1	5.19	21	13.7	53
number1541	Male	59	78.5	172	26.5346	2.1	4.74	148	276	45	6.16	14	18.9	65
number1542	Male	54	81.7	186	23.6154	4.98	5.7	161	258	45	4.76	18.5	44.9	68
number1543	Female	56	64.9	168.5	22.8584	2.05	4.24	123	243	45	5.49	6.6	13.2	68
number1544	Male	59	60.6	171.5	20.6037	2.16	7.71	149	232	47.7	7.89	14.7	16.3	60
number1545	Female	52	62.8	162.5	23.7822	2.55	4.21	149	187	46.6	4.78	16.7	13.4	59
number1546	Male	31	68.3	167	24.4899	2.41	4.81	164	209	48.1	4.62	11.6	18.6	60
number1547	Male	28	66.9	168	23.7032	2.15	4.77	156	217	46	4.13	35.9	11.8	67
number1548	Male	31	73.1	185.5	21.2437	2.9	4.23	159	201	45.8	4.64	23	16.1	78
number1549	Male	47	80.7	173.5	26.8086	4.18	6.08	161	154	46	5.01	22.9	19.1	81
number1550	Male	56	65	168.5	22.8936	2.04	6.91	147	157	48.8	5.49	24.8	9.3	99
number1551	Female	55	60.1	163	22.6203	2.91	4.21	134	208	43.9	5.57	11.8	16.2	51
number1552	Female	54	49.8	155.5	20.5953	2.05	4.79	122	219	44.2	5.33	10.7	15.3	115
number1553	Male	56	78.2	172	26.4332	3.13	5.19	163	190	45.2	5.36	16	12.2	54
number1554	Male	53	66	170	22.8374	4.48	8.98	171	278	44	5.23	13.6	26.7	83
number1555	Male	46	89.3	176.5	28.6657	3.03	6.52	167	250	43.6	5.41	18	66.2	89
number1556	Male	57	77.3	169	27.0649	2.17	5.21	154	182	47.9	5.28	18.4	16.6	77
number1557	Male	60	59.8	164.5	22.0988	3.21	6.17	144	159	41.4	5.72	14.3	10.1	66
number1558	Male	59	69.4	165.5	25.3375	3.75	4.13	167	104	49	5.96	18.5	26.6	87
number1559	Male	50	64.6	165	23.7282	1.13	4.49	160	250	43.2	4.95	11.4	18.4	116
number1560	Male	53	64.8	166	23.5157	3.65	4.58	159	116	47.1	5.93	23.6	26.4	47
number1561	Male	43	66.5	168	23.5615	1.38	5.23	168	200	46.7	4.76	15.7	20.5	104
number1562	Male	57	70	165	25.7117	2.39	4.78	138	208	42.9	4.99	14.2	12	56
number1563	Male	53	68.4	177.5	21.71	3.66	5.48	159	164	45.7	6.53	19.5	19.8	66
number1564	Female	45	53.8	161.5	20.6271	2.68	5.22	136	175	45.4	4.93	13	20.1	62
number1565	Female	47	53.2	150	23.6444	2.5	6.85	145	249	48.4	6.02	7.7	13	84
number1566	Male	48	80.4	176	25.9556	6.9	6.97	155	219	46.4	4.31	23.2	24.8	85
number1567	Male	55	72.2	173	24.1238	1.83	4.12	141	127	41.6	5.17	19.7	14	74
number1568	Male	43	72.5	172	24.5065	2.48	5.33	149	251	44.8	5.65	17.9	21.9	67
number1569	Male	56	77.2	170.5	26.5564	3.04	5.81	156	240	45.2	6.27	19.1	26.3	87
number1570	Male	55	73.1	166.5	26.3687	4.34	7.72	154	303	44.7	5.41	15.9	24.8	75
number1571	Female	53	47.9	154	20.1973	2.04	4.55	138	239	41.9	4.82	12.1	9.5	43
number1572	Female	44	53.5	151.5	23.3093	1.94	7.35	124	239	40.1	4.44	10.1	9	46
number1573	Male	48	63.2	172.5	21.2392	2.75	6.21	143	271	45.7	5.43	18.5	18.5	65
number1574	Male	44	80.9	169.5	28.1585	3.86	6.65	156	281	46.3	4.97	12.3	21.5	74
number1575	Male	46	69.5	166.5	25.0701	7.39	4.19	147	149	47.1	5.44	14.8	140.6	89
number1576	Male	42	67	171.5	22.7796	4.35	6.44	163	258	47.5	5.32	22.2	24.3	55
number1577	Male	46	66.3	157.5	26.7271	2.83	7.43	169	219	42	5.68	11.5	23.6	85
number1578	Male	43	73.3	166.5	26.4409	2.29	7.28	157	244	45.8	5.59	28.7	23	107
number1579	Male	45	59.5	167	21.3346	2.09	5.89	164	188	48.4	5.43	11.3	22.6	85
number1580	Female	57	50.8	155	21.1446	1.99	5.41	120	171	42.7	5.61	14.4	19.7	99
number1581	Male	47	71.1	162	27.0919	2.38	5.93	151	238	43.2	5.42	31.6	23.8	100
number1582	Male	49	71	173	23.7228	1.75	7.22	167	233	43.1	5.15	17.5	21.6	69
number1583	Male	62	66.2	166	24.0238	3.57	5.49	155	201	40.8	5.37	11.2	16.7	46
number1584	Male	54	82.9	165	30.45	2.79	5.76	123	261	42.6	4.38	10.1	84.9	90
number1585	Male	41	60.4	168	21.4002	4.64	5.51	179	150	46.5	4.98	10.6	22.9	82
number1586	Female	51	64.5	161	24.8833	1.61	5.22	130	189	42	4.96	11.6	12	53
number1587	Male	57	60.8	159.5	23.8991	4.2	4.98	162	188	48.4	5.06	14.4	15.5	65
number1588	Female	47	55	165.5	20.0801	2.77	4.88	124	196	40.6	4.74	13.9	9.9	51
number1589	Female	54	47.7	151	20.9201	10.07	8.97	142	412	44.5	4.64	19.9	17.4	100
number1590	Male	56	68.8	179	21.4725	2.01	5.82	156	178	44.2	5.4	15.7	24.5	63
number1591	Male	40	71	165.5	25.9216	2.52	6.26	143	182	43.8	5.52	23.1	8.9	71
number1592	Male	56	83.6	161.5	32.0524	1.89	5.79	144	141	40.9	4.88	17.4	48.7	46
number1593	Male	55	71.5	169.5	24.8867	1.98	6.72	146	290	43.4	5.24	13.5	36.1	126
number1594	Male	61	63.6	160.5	24.6892	1.67	5.34	165	167	45.3	5.36	22.3	12.6	144
number1595	Male	40	56.7	168.5	19.9702	4.18	5.23	148	195	48.1	5	12.3	14.3	71
number1596	Female	55	49.4	158.5	19.6638	2.26	3.55	132	292	43.3	4.69	16.3	12.3	54
number1597	Male	48	78.2	168.5	27.5427	2.48	5.58	158	251	45.6	5.38	15.4	19.9	69
number1598	Male	58	59.9	164	22.271	1.84	4.13	163	225	44.3	5.32	13.5	15.2	66
number1599	Male	48	74	172	25.0135	3.13	8.97	142	412	40.8	5.36	11.6	12.4	111
number1600	Male	61	122	178.5	38.2898	7.38	5.62	163	279	44.5	6.56	18.4	17.3	113
number1601	Male	57	64.2	165	23.5813	2.13	4.95	159	203	40.8	5.29	21.2	31.2	64
number1602	Male	51	74	177	23.6203	4.53	4.57	146	162	40.5	4.35	26.8	10.7	81
number1603	Female	32	57.9	164.5	21.3967	3.28	5.84	127	230	47.5	5.24	21.7	7.6	56
number1604	Male	54	89.2	181.5	27.0777	3.84	7.4	166	252	41.9	5.21	16.5	18.6	71
number1605	Male	52	63	169.5	21.9281	0.71	3.78	155	105	42.9	5.02	19	16.8	94
number1606	Male	47	65.7	166.5	23.6994	2.5	6.17	151	221	42.9	5.33	19.4	20	65
number1607	Female	53	63.5	166	23.044	1.97	6.32	140	217	39.3	4.61	14.3	21.1	58
number1608	Male	48	72.5	167.5	25.8409	1.75	7.83	150	297	44.3	4.66	11	21.9	67
number1609	Female	43	52.2	161	20.1381	2.63	4.81	126	179	45	4.82	13.7	12.7	48
number1610	Male	47	58.1	162	22.1384	2.1	5.95	158	266	44	4.96	18.6	22.6	100
number1611	Male	39	67.6	168.5	23.8093	1.33	6.01	147	232	44.3	5.23	21.8	13.7	87
number1612	Male	56	67.8	164.5	25.0552	2.33	8.92	151	246	44.2	7.7	7.7	13.4	89
number1613	Male	52	73.1	163	27.5133	2.94	6.14	160	233	41.2	5.2	20.9	38.7	104
number1614	Male	57	96.3	168.5	33.9177	2.13	8.97	110	398	39.9	7.31	7.2	14.3	130
number1615	Male	59	61	166.5	22.004	6.23	11.01	155	422	39.6	5.41	16.6	11.6	73
number1616	Male	41	77.6	173.5	25.7788	3.26	6.63	153	254	51	5.13	16.3	22.1	120
number1617	Male	44	75	166	27.2173	4.64	6.34	150	232	44.6	5.35	10	28.3	94
number1618	Female	58	54.7	165.5	19.9706	2.43	4.96	124	192	41.7	5.09	14.4	17.5	74
number1619	Male	41	75.9	166	27.5439	2.05	5.16	152	208	45.7	5.72	13.5	38.8	83
number1620	Male	53	69.4	169.5	24.1557	2.4	8.39	146	236	40.1	5.02	13.2	16.8	150
number1621	Male	48	73.9	181	22.5573	3.65	7.17	154	182	47	5.5	13.3	26.5	87
number1622	Female	43	45.8	160	17.8906	1.84	5.65	121	202	41.6	4.49	9.7	9.2	44
number1623	Male	41	72.6	180.5	22.2834	3.1	4.37	162	222	45	5.06	31.1	14.1	87
number1624	Male	44	61.6	167	22.0876	5.42	5.59	160	211	46	5.12	12.4	19.9	103
number1625	Male	49	74.5	166	27.0359	2.37	7.43	157	305	44.1	6.15	9.6	17.6	90
number1626	Male	53	70.1	168	24.837	1.87	4.48	129	205	44.4	5.47	16.2	24.8	60
number1627	Male	59	65.3	163.5	24.4274	2.1	6.34	159	166	44.3	4.92	23.9	37.7	92
number1628	Male	59	63.4	161	24.4589	4.47	6.75	160	225	42.5	4.74	13.8	20.9	77
number1629	Male	42	71.6	181.5	21.735	3.14	5.82	150	211	45.8	5.39	13.9	13	74
number1630	Male	59	73.1	169.5	25.4436	2.99	6.15	150	177	47.3	5.55	12.2	21.8	81
number1631	Male	57	81.9	177	26.1419	4.25	7.87	153	197	46.3	4.18	19.3	12.4	91
number1632	Male	57	77.1	165.5	28.1487	3.1	4.98	153	206	47.4	5.24	17.1	27.7	94
number1633	Male	58	57.6	165	21.157	3.49	3.9	153	216	45.7	4.9	21.7	41.7	58
number1634	Male	59	60.3	168	21.3648	5.01	3.71	160	165	45.9	5.91	18.2	54.1	72
number1635	Male	53	79.1	172	26.7374	2.58	6.75	152	175	48.2	4.85	11.5	21.8	83
number1636	Male	59	67.1	172.5	22.5499	2.22	5.8	152	231	45.6	4.76	20.6	24.6	86
number1637	Female	40	55.4	151	24.2972	2.33	7.83	113	254	44	4.55	11.1	12.2	39
number1638	Male	42	83	180	25.6173	4.56	6.18	164	243	44.7	4.8	14	32.2	84
number1639	Male	58	71.4	165	26.2259	2.96	6.6	140	242	42.5	7.48	25.6	19.2	63
number1640	Male	52	78.1	171	26.7091	1.91	6.11	152	176	46	5.2	20.9	29.4	47
number1641	Male	45	82	175	26.7755	2.43	8.44	164	296	48.2	4.62	19.6	35.2	76
number1642	Male	46	85.2	176.5	27.3495	2.74	5.77	155	177	45.4	5.42	10.2	24	98
number1643	Female	48	56.6	159.5	22.2482	3.11	3.68	122	231	46.9	4.66	11	14.2	75
number1644	Female	42	57.4	158	22.9931	2.01	5.49	124	242	48.7	4.79	16.8	8.7	69
number1645	Male	50	64.5	159	25.5132	2.59	5.48	155	154	45.7	4.42	19.2	18.1	113
number1646	Male	51	76.1	164.5	28.1224	8.82	5.9	157	234	44.4	5.18	16.1	15.8	72
number1647	Male	48	72.5	164.5	26.7921	23.45	9.01	159	256	46.4	4.86	8.6	9.7	94
number1648	Female	57	53.7	149.5	24.0266	4.34	6.21	143	191	44.4	4.47	13.3	23.5	142
number1649	Male	52	71.6	164.5	26.4595	2.58	6.98	158	259	45.9	5.02	13.8	17	67
number1650	Male	57	54.3	159.5	21.3441	2.12	4.92	154	173	42.8	4.62	16.5	14.7	81
number1651	Male	58	63.6	165.5	23.2199	1.95	4.24	143	174	41.8	5.1	13.1	12.6	67
number1652	Male	37	62.9	153.5	26.6952	1.83	4.45	163	223	46.6	4.15	23.8	23	56
number1653	Female	45	48.3	155.5	19.975	1.97	4.78	119	213	41.6	4.35	15.7	8.2	50
number1654	Male	55	68.3	169	23.9137	3.7	6.25	152	236	45.6	4.61	14.5	9.1	81
number1655	Male	41	76.6	166.5	27.6312	2.2	8.31	162	320	47.5	4.54	21.2	23	123
number1656	Female	51	59.2	164.5	21.8771	3	4.55	135	229	46.1	4.63	11	16.3	92
number1657	Female	52	49.2	154.5	20.6114	2.92	5.91	148	250	47.9	4.79	31.6	13	85
number1658	Male	42	83.2	175.5	27.0128	2.98	5.94	144	283	45.8	6.64	11	46.7	70
number1659	Male	33	73.6	164	27.3647	3.35	8.53	149	265	45.4	5.02	15.4	61.8	88
number1660	Male	35	77.4	172	26.1628	3.21	6.62	143	187	42.9	4.6	17.4	15.7	104
number1661	Male	47	70.5	169.5	24.5386	3.39	7.66	160	221	46.3	4.75	14.4	56.2	122
number1662	Male	37	75.7	176	24.4383	1.9	4.72	144	252	45.4	4.82	17.2	21.1	86
number1663	Male	58	74.9	173	25.0259	2.06	8.04	154	187	45.2	4.3	10.8	17.8	55
number1664	Male	49	51.6	157	20.9339	1.52	5.37	143	211	47.4	5.48	12.2	12.8	74
number1665	Male	42	73.2	168.5	25.7817	4.28	6.12	173	264	47.4	4.99	22.5	33.7	101
number1666	Female	58	64.2	166.5	23.1583	3.76	5.85	141	254	47.2	5.57	10.5	16.5	100
number1667	Female	57	61.9	168.5	21.8017	1.69	6.51	130	231	41.8	4.75	7.7	17.2	80
number1668	Male	50	66.1	166.5	23.8437	5.89	6.88	149	190	45.2	4.58	14.1	22.9	72
number1669	Male	55	64.6	154.5	27.063	2.43	6.86	138	310	47.8	5.46	10	39.8	47
number1670	Male	47	136.1	176.5	43.6887	2.23	7.16	151	212	42.7	6.7	23.1	32.2	68
number1671	Male	32	67.8	174.5	22.2658	4.52	5.68	164	185	49.6	4.62	25.5	17.4	79
number1672	Male	50	89.9	181.5	27.2902	2.18	7.75	137	287	43.6	8.49	10	34.6	81
number1673	Female	47	71.7	163	26.9863	4.57	8.03	134	256	48.3	4.85	8.5	26.2	50
number1674	Male	59	81.7	166.5	29.4709	2.66	5.13	154	190	45.4	4.89	10.5	45.4	60
number1675	Male	54	84.8	175.5	27.5322	4.98	6.9	148	199	43.3	5.11	23.6	34.1	78
number1676	Female	51	55.3	159.5	21.7372	3.02	4.37	130	172	44.1	4.72	12.7	14.7	71
number1677	Male	51	71.1	166.5	25.6473	2.66	6.52	139	180	43.5	4.43	20.3	20.6	75
number1678	Male	64	72.6	165.5	26.5058	1.81	3.53	140	185	47	7.4	16.2	46	56
number1679	Male	43	86.4	168	30.6122	2.29	6.3	152	249	46.1	6.13	20.5	25	119
number1680	Male	54	72.3	160.5	28.0665	4.67	7.2	150	258	45	4.68	11.2	16.2	39
number1681	Male	42	55.1	170.5	18.9541	1.5	4.68	147	212	45.8	4.61	21.2	14.1	55
number1682	Male	39	72.4	160.5	28.1053	3.07	7.7	161	247	45.7	4.82	15.2	153.1	58
number1683	Male	45	79.7	173.5	26.4764	1.9	5.09	164	255	43.8	4.6	20.6	66.2	72
number1684	Male	48	67.4	170	23.3218	1.76	5.65	154	191	48	4.68	15.6	18.9	83
number1685	Female	48	58.7	162.5	22.2296	7.09	9.85	112	276	47.2	4.39	10.8	13.6	77
number1686	Female	45	54.9	155.5	22.7045	1.7	5.76	141	333	46.1	4.19	14.1	15.2	67
number1687	Male	57	61.4	162	23.3958	3.12	5.65	150	228	43.7	5.21	15.8	21.1	68
number1688	Male	57	65	168	23.03	3.72	8.41	145	268	44	4.71	16.2	21.3	70
number1689	Female	59	54.2	164	20.1517	1.83	4.73	126	271	41.8	4.42	19	12.8	104
number1690	Female	56	65.9	162.5	24.9562	2.07	3.68	136	186	45.7	4.87	14.8	5.9	81
number1691	Male	48	81.4	170.5	28.0011	1.77	4.82	143	229	43.6	4.97	14.6	30.1	101
number1692	Male	41	64.1	186.5	18.4289	4.46	4.54	142	179	47	4.4	18.2	12.4	78
number1693	Male	58	74.4	170.5	25.5932	3.92	7.14	143	185	45.8	4.99	11.6	13.9	95
number1694	Male	45	59.2	160.5	22.9811	3.21	7.81	133	333	42.2	4.35	11.9	11.6	110
number1695	Male	52	62.3	159.5	24.4888	2.55	7.36	132	226	45.8	4.78	16.4	13.8	50
number1696	Male	51	70.1	165	25.7484	2.53	6.48	156	159	46.4	4.72	38.5	15.2	100
number1697	Male	56	70.6	176.5	22.6629	2.19	6.32	154	252	51.3	5.91	11.8	20.1	75
number1698	Female	57	54.9	160	21.4453	7.28	3.7	120	158	46	5.07	10.7	34.9	103
number1699	Female	58	72.3	173	24.1572	4.32	5.8	139	214	47.2	5.25	15.8	13.4	53
number1700	Male	52	74.7	173.5	24.8154	4.73	7.74	157	308	45.9	5.41	12.8	26.5	79
number1701	Male	43	72.4	177.5	22.9796	5.4	4.59	143	158	43.8	4.5	23.3	43.1	115
number1702	Male	57	91.6	188	25.9167	2.15	6.1	159	176	42.9	5.42	23.3	36	100
number1703	Male	42	82.7	166.5	29.8316	3.11	4.19	144	241	45.9	4.57	24.4	94.6	102
number1704	Male	43	77.6	174.5	25.4842	2.9	6.47	153	247	44.2	4.67	11.2	50.1	51
number1705	Male	47	75.8	172.5	25.4736	1.54	4.42	145	198	45.6	4.21	16.3	33.8	66
number1706	Male	36	74.1	175	24.1959	2.36	5.17	152	178	46.9	4.93	27.5	14.7	52
number1707	Male	49	67.8	172	22.9178	6.63	5.16	157	247	47.6	4.9	20.6	17.6	79
number1708	Male	51	73.7	170.5	25.3524	4.04	8.2	144	291	46.6	4.84	10.8	18.9	41
number1709	Male	58	72.8	164.5	26.9029	1.97	5.19	151	160	44.6	6.26	21.3	16.4	60
number1710	Male	54	84.7	183.5	25.1542	3.34	5.38	146	242	47.9	7.04	37.8	16.5	52
number1711	Male	46	86.6	178	27.3324	2.1	4.79	159	164	50	4.63	19.2	21.2	81
number1712	Male	54	85.1	178	26.859	2.09	5.52	148	241	43.8	4.71	16	22.8	74
number1713	Male	44	67.2	163	25.2926	2.61	5.79	146	263	48.1	4.5	18.4	20.9	88
number1714	Male	41	67.4	178.5	21.1536	2.18	5.14	149	290	43.1	4.79	13.8	12.6	84
number1715	Female	48	61.9	159	24.4848	1.99	3.6	116	216	41.6	4.74	8.7	8	57
number1716	Male	40	65.2	177	20.8114	4.18	5.59	151	233	44.1	4.45	23.3	21.2	87
number1717	Female	40	52.9	159	20.9248	2.61	5.5	126	234	45.7	4.44	33.7	10.2	49
number1718	Male	41	66.9	173.5	22.2243	2.56	4.64	145	192	47	5.08	16.7	9.8	61
number1719	Female	42	59.9	170.5	20.6053	4.91	3.38	115	265	44.9	4.42	19.7	14.5	48
number1720	Male	63	64.6	166.5	23.3026	4.95	5.26	143	189	41.2	4.99	12.6	12.4	60
number1721	Male	82	55.4	169	19.3971	1.41	5.79	108	183	41.5	4.81	10.4	14.3	104
number1722	Male	56	64.5	168	22.8529	2.44	6.09	153	289	45.5	5.33	17.8	32	68
number1723	Male	55	73.3	165.5	26.7613	1.9	5.21	162	211	47.1	5.05	19.1	18.7	42
number1724	Male	48	93.1	170.5	32.0259	2.37	8.4	151	237	44.1	4.8	15.3	25.3	99
number1725	Male	50	57.8	167	20.725	4.6	9.14	155	225	45.8	4.7	16.2	49.9	111
number1726	Male	44	66.5	169.5	23.1463	1.6	8.75	150	263	46.6	4.95	13.4	9.6	129
number1727	Female	51	56.4	159.5	22.1696	4.19	5.9	130	223	43.9	4.57	22.1	6.9	66
number1728	Male	55	91.3	177	29.1423	2.55	5.98	148	215	45	4.36	21.7	33.1	84
number1729	Male	44	62	171.5	21.0797	1.92	5.07	164	172	43.5	4.68	15.4	36.6	63
number1730	Male	49	68.3	166.5	24.6372	2.32	5.17	148	173	47.4	4.54	32.2	22	94
number1731	Male	59	73.3	166.5	26.4409	2.35	4.77	141	237	42.6	5.15	11.3	11.5	83
number1732	Female	45	52.1	157	21.1368	7.67	4.54	141	217	45.8	5.24	12.1	14.8	56
number1733	Female	61	88.6	169.5	30.8386	1.75	6.22	140	230	42.6	4.7	18.2	20.6	103
number1734	Male	63	78.3	173.5	26.0113	4.13	5.69	158	260	44.4	5.25	10.5	18.5	64
number1735	Female	57	68.8	161	26.5422	3.75	5.52	147	244	43.3	5.63	12.7	35.9	82
number1736	Male	59	86.1	165.5	31.4345	5.16	8.38	155	185	42.8	6.46	15.4	12.4	86
number1737	Male	58	73	170	25.2595	2.91	5.11	155	161	42.5	5.14	21.2	16.7	89
number1738	Male	52	51	161.5	19.5535	4.35	4.49	155	129	42.8	5.52	17.9	32.6	96
number1739	Male	49	85.6	170.5	29.4459	4.42	7.81	166	229	43.8	5.57	13.5	67.6	46
number1740	Female	48	59.1	160.5	22.9423	3.05	6.17	127	232	42.6	4.4	9.2	7.8	61
number1741	Male	46	67.1	169	23.4936	2.59	6.68	156	163	46.3	4.9	8.9	18.4	77
number1742	Female	49	57.4	157.5	23.1393	3.25	5.08	135	191	42.8	4.77	9	20.4	85
number1743	Male	53	67.9	164	25.2454	22.55	4.84	159	142	43.5	4.25	18.7	147.7	143
number1744	Male	49	70.6	169.5	24.5734	5.85	5.09	163	183	40.5	5.52	8.3	43	81
number1745	Male	56	69.7	161	26.8894	1.8	5.12	149	169	44.6	5.36	12.8	20.8	104
number1746	Female	43	56	152.5	24.0795	2.38	5.11	146	233	44.2	4.63	20.3	13.8	60
number1747	Female	40	60.3	167	21.6214	2.99	4.74	121	126	44.1	4.85	10.6	10.4	72
number1748	Male	38	58.2	173.5	19.3341	3.25	6.99	151	275	47	4.37	13.9	22.4	100
number1749	Male	58	81.5	174	26.919	6.25	7.37	154	170	47	6.89	12.7	39.2	98
number1750	Male	43	70.8	164	26.3236	2.62	5.73	158	149	47.1	4.94	32.6	16.1	76
number1751	Male	59	63.4	166.5	22.8697	6.03	6.31	145	252	45.3	4.73	18.9	13.3	61
number1752	Male	51	74.4	174.5	24.4333	2.32	4.94	166	220	44.7	5.3	29.4	45.3	63
number1753	Male	36	85.8	171	29.3424	2.72	7.56	157	294	45	4.87	8	20.4	66
number1754	Male	58	65.6	173.5	21.7924	3.5	9.42	152	240	43	5.06	11.6	18.7	68
number1755	Male	56	68	165	24.977	7.43	8.71	165	227	43.2	4.69	25.2	22.8	80
number1756	Male	50	89.2	190	24.7091	3.39	4.95	156	147	45.1	5.62	16.5	13.9	67
number1757	Male	57	72.7	168.5	25.6056	3.69	6.16	142	239	45	5.32	11.2	14	70
number1758	Male	41	69	165	25.3444	2.38	7.71	154	248	47	4.49	13	12.4	58
number1759	Male	56	66.2	166.5	23.8797	4.24	7.84	147	193	44	4.99	14.5	14.4	93
number1760	Female	55	63.5	156.5	25.9266	4.08	3.83	132	168	45.1	5.13	10.8	15.2	82
number1761	Female	56	47.9	159.5	18.8284	3.66	6.25	136	185	41.5	4.12	23.9	21.2	87
number1762	Male	49	64	164	23.7954	3.12	4.62	151	200	44.9	4.33	14.5	18.7	63
number1763	Male	41	71.3	180	22.0062	3.37	4.45	152	251	48.6	4.72	12.3	11.5	54
number1764	Male	58	95.4	178.5	29.9414	3.56	8.09	154	275	46.1	10.44	17.8	36	70
number1765	Male	57	62.1	159	24.5639	2.76	7.49	155	207	47.8	4.82	15.8	44.7	89
number1766	Female	57	61.1	157.5	24.6309	4.91	6.35	149	251	48.6	5.94	16.2	59.6	120
number1767	Male	56	61.7	163	23.2226	5.8	7.26	152	231	45	4.82	18	26.2	73
number1768	Male	44	81.1	174.5	26.6336	3.27	7.15	159	184	46.9	4.56	10.1	12.4	59
number1769	Male	58	75.4	167.5	26.8746	5.4	6.1	136	189	44.5	4.55	9.9	13.5	69
number1770	Female	42	58.3	155.5	24.1106	1.93	6.99	126	228	43.4	4.79	11.3	13.1	51
number1771	Female	45	44	143	21.5169	2.32	7.32	138	244	43	4.55	17.5	7	50
number1772	Male	44	99.4	181.5	30.174	3.23	6.42	157	288	46.3	4.79	17.5	28.6	44
number1773	Male	59	74.4	176	24.0186	3.75	5.62	157	254	45	5.25	14.7	15.7	72
number1774	Female	50	56.4	169	19.7472	2.9	4.76	133	267	46.4	4.67	15.4	8.5	45
number1775	Male	31	67.8	174	22.394	2.72	4.39	156	168	44.6	4.6	12.3	19.8	78
number1776	Female	49	48.7	161	18.7879	2.77	4.86	130	163	41.3	4.44	8.2	7.6	65
number1777	Male	55	60	154.5	25.1359	2.51	5.35	146	238	45.7	4.3	17.8	26.6	61
number1778	Male	39	71.5	168	25.333	1.31	5.17	159	249	45.5	4.07	14.7	28.7	95
number1779	Male	53	63.7	166	23.1166	3.96	6.53	136	258	40.6	6.73	12.9	13.6	62
number1780	Male	41	70	169	24.5089	2.05	5.43	146	239	46.6	5.3	12.4	16.9	96
number1781	Male	34	64	164.5	23.6509	3.18	5.95	169	204	46.3	4.65	61	29.7	61
number1782	Male	58	71.3	163.5	26.6719	3.2	5.89	162	162	44.6	4.59	15.4	22	83
number1783	Female	43	52.9	155	22.0187	2	4.34	124	197	44.8	4.66	13.9	20.4	76
number1784	Female	50	56	162.5	21.2071	4.31	2.51	139	217	43	3.68	24.3	14.9	61
number1785	Male	41	70	168.5	24.6546	6.89	5.92	137	166	45.1	5.42	17.6	28.8	98
number1786	Female	43	57.4	160.5	22.2824	2.77	4.97	122	225	40.7	4.86	15.6	11.6	45
number1787	Female	43	48.1	155	20.0208	3.8	6.56	134	184	45.5	4.72	12.5	9.4	70
number1788	Female	56	52.7	150	23.4222	4.19	5	131	183	45.7	4.2	12.2	23	59
number1789	Male	58	60.7	161.5	23.2725	3.72	8.19	150	254	44.5	4.9	14.1	9.7	53
number1790	Male	40	76.1	174	25.1354	1.94	4.83	139	128	46.4	4.53	40.7	55.5	60
number1791	Male	42	70.1	168.5	24.6898	5.52	5.35	152	171	46.7	4.9	13.9	31.2	73
number1792	Male	59	84.2	179	26.2788	1.53	7.06	176	223	45.2	4.88	15.6	25.8	66
number1793	Male	43	73.2	171	25.0333	2.27	7.46	159	268	46.9	4.91	14.7	24.1	69
number1794	Male	51	77.9	177.5	24.7253	2.15	5.91	152	169	42.8	4.2	15.8	23	78
number1795	Male	58	92.1	177.5	29.2323	4.16	11.32	169	176	44.1	4.56	20	37	68
number1796	Male	38	72.8	165	26.7401	6.7	5.88	174	180	46.8	4.69	25.5	33.2	69
number1797	Female	49	56.6	156	23.2577	4.65	4.42	120	220	39.3	4.78	14.1	10.4	55
number1798	Male	48	80.3	171	27.4614	4.4	6.16	162	175	45.2	4.52	10.1	26.9	59
number1799	Male	56	88.1	175	28.7673	3.07	6.47	143	204	45.7	4.93	11	24.1	60
number1800	Male	44	89.3	175	29.1592	2.95	5.87	142	188	43.6	5.57	13.1	46.9	85
number1801	Male	48	68.6	173	22.9209	3.62	5.07	149	109	44.6	5.23	21.3	50.3	103
number1802	Female	45	57.4	161	22.1442	2.34	4.68	123	197	41.4	5.09	8.9	11.2	59
number1803	Male	57	82	163	30.863	1.49	4.28	157	213	45	5.27	21.5	31.3	79
number1804	Male	52	63	160	24.6094	2.29	8.26	146	198	44.3	6.19	10.3	13.7	98
number1805	Male	58	79.3	171.5	26.9616	3.97	5.72	148	180	44.2	4.95	13.6	21.2	67
number1806	Male	39	66.1	173	22.0856	3.14	3.54	143	291	44.8	4.86	15.8	11.5	74
number1807	Female	45	59.3	154.5	24.8426	2.67	6.31	128	307	45	5.13	10.8	14.4	72
number1808	Male	58	76.9	171.5	26.1456	3.2	10.1	148	287	42.7	5.27	11.5	17.8	87
number1809	Male	57	79.5	171.5	27.0296	6.87	9.27	165	268	41.4	5.09	16.3	20.1	79
number1810	Male	52	69.4	161.5	26.6081	1.84	6.78	161	207	45.6	5.59	20.4	26.2	92
number1811	Male	52	68.6	173.5	22.789	2.67	4.68	138	188	40.4	4.95	16.5	37.1	65
number1812	Male	49	58.3	165	21.4141	2.84	6.59	159	212	43.4	3.95	15.2	17.7	149
number1813	Female	45	50.8	151.5	22.1329	4.37	4.85	145	204	42.8	4.16	11.6	7.9	52
number1814	Female	44	57.1	149.5	25.5478	1.48	4.35	129	177	40.9	4.73	13.4	33.2	104
number1815	Male	58	69.3	170	23.9792	3.37	5.95	155	151	41.8	5.02	20.3	13.7	67
number1816	Female	56	66.9	165.5	24.4247	2.7	4.19	132	236	45.5	5.36	14.5	13.7	121
number1817	Female	57	64.8	161	24.999	4.53	8.33	147	180	43.3	4.43	15.2	30.3	94
number1818	Male	37	77	173.5	25.5795	4.19	4.49	153	218	46.9	4.86	13.3	13.4	53
number1819	Male	37	76.3	164	28.3685	2.7	7.06	150	210	45.4	4.69	18.5	35.4	72
number1820	Male	46	73.5	167	26.3545	1.32	5.31	148	169	47.7	5.86	18.9	10	87
number1821	Male	42	58.8	177.5	18.663	3.16	3.97	146	138	47	4.69	14.9	22.7	92
number1822	Male	46	81.7	171	27.9402	4.84	5.92	148	196	41.8	4.65	24.9	8.3	95
number1823	Female	41	48.4	150.5	21.3684	1.54	5.74	97	309	45.7	4.8	7.4	10.2	53
number1824	Female	38	53.4	160.5	20.7296	3.98	4.93	121	374	42	4.55	10.4	11.2	70
number1825	Male	31	74.8	181	22.832	3.16	4.85	151	182	47.1	4.82	19.6	17.8	56
number1826	Male	58	73.5	170	25.4325	3.93	5.8	150	182	42.2	4.66	25	18.5	66
number1827	Female	45	53.3	154.5	22.329	4.31	5.99	130	174	42.3	5.03	21	10.1	63
number1828	Male	54	65.6	164.5	24.2422	2.39	6.2	170	186	44.2	4.39	11.9	24.3	84
number1829	Male	57	76.5	170	26.4706	3.27	6.07	147	204	48	5.92	15.9	44.7	55
number1830	Male	47	79.2	174.5	26.0096	4.26	5.03	156	216	45.5	4.48	22.9	34	82
number1831	Male	54	72.7	171.5	24.7176	8.96	5.75	154	152	43	3.95	12.4	13.6	62
number1832	Male	62	80.5	163	30.2985	2.79	5.31	150	261	44.3	10.33	13.3	26.3	79
number1833	Male	56	71.9	162	27.3967	3.23	4.71	161	179	45.8	4.88	16.4	21.5	68
number1834	Male	43	71.3	160	27.8516	1.66	6.41	159	255	45.4	4.39	26.6	17.9	135
number1835	Female	49	77.5	159.5	30.4635	5.34	5	141	222	45	4.79	15.1	31.6	72
number1836	Female	45	61.4	160.5	23.8352	1.06	6.93	116	309	41	4.45	16.2	11.3	63
number1837	Male	46	59.6	162.5	22.5704	2.1	5.31	142	209	45.6	4.63	23.1	16.5	62
number1838	Male	61	62.9	170	21.7647	3.91	4.53	145	248	44.7	4.65	13.9	26.1	66
number1839	Male	56	85.4	177.5	27.1057	2.95	4.49	137	125	44.3	5.09	21.3	27.6	50
number1840	Female	49	54.4	160	21.25	2.26	7.14	142	279	42.5	3.82	15.5	14	90
number1841	Male	50	75.2	171	25.7173	8.78	5.25	146	182	43.5	5.39	15.2	20.5	64
number1842	Male	35	78.2	180	24.1358	2.91	6.75	172	181	46.3	3.59	12.5	15.6	81
number1843	Male	48	74.5	165.5	27.1995	1.4	4.08	146	181	44.9	4.59	25.5	33.6	68
number1844	Male	59	90.6	177	28.9189	4.92	8.65	163	211	49.2	4.77	11.7	25.6	67
number1845	Male	43	80.4	167.5	28.6567	3.39	6.72	150	252	45.2	4.73	13.8	28.9	90
number1846	Male	37	72.9	183	21.7683	4.43	5.06	158	162	45	4.36	21.5	24.3	84
number1847	Male	51	72.1	164.5	26.6442	2.82	5.54	169	174	41.9	3.91	23.6	15.1	65
number1848	Male	59	64.5	156	26.5039	3.57	3.78	133	274	44.6	6.9	10.8	20.8	68
number1849	Male	47	62.5	169.5	21.7541	8.2	7	149	249	50.5	3.87	15.9	20.1	71
number1850	Male	42	71	166	25.7657	2.82	7.26	157	206	43.7	4.14	11.6	26	67
number1851	Male	43	80.4	164.5	29.7115	2.5	6.24	159	219	44.6	4.56	17.7	83.6	64
number1852	Female	42	64.9	164.5	23.9835	4.01	5.86	138	237	42.6	4.5	9.2	9.4	57
number1853	Male	47	74.3	170	25.7093	1.92	4.47	143	207	44	4.79	13.5	16.1	77
number1854	Female	52	50.4	160.5	19.565	6.27	7.14	138	239	44	4.57	16.7	15.1	66
number1855	Male	45	72.4	172.5	24.331	3.71	5.35	153	179	44	4.42	18	13.4	79
number1856	Male	32	60.8	167.5	21.6708	1.96	5.65	160	243	47.5	5.07	14.6	27	57
number1857	Female	43	56.5	159	22.3488	8.85	5.25	127	230	42.1	4.63	10.8	10.9	60
number1858	Female	43	53.8	153.5	22.8331	2.31	6.02	139	246	43.1	4.31	14.5	14.5	59
number1859	Male	57	56.5	168	20.0184	3.67	4.73	130	164	44.2	4.97	27.2	12.1	55
number1860	Male	42	65.6	169.5	22.8331	2.05	5.68	167	212	43.6	4.86	17.1	35.2	96
number1861	Male	51	75.9	174	25.0694	3.67	5.37	149	188	46.9	5.94	12.9	29.4	81
number1862	Male	43	86.9	178.5	27.2737	3.64	5.49	156	206	44.7	4.75	22.2	33	79
number1863	Male	46	79.8	170.5	27.4507	1.64	7.85	147	226	47.9	4.89	22.7	50.3	85
number1864	Male	42	78.1	181.5	23.7082	4.17	5.48	148	248	48.2	5.11	28.1	24.6	65
number1865	Male	40	66.9	164	24.8736	3.87	5.53	161	198	45.9	4.54	27.3	26.1	55
number1866	Female	33	55.3	162	21.0715	2.51	7.27	129	318	45.4	5.16	13.6	8.4	58
number1867	Male	30	66.5	172.5	22.3482	3.93	6.42	157	244	49.3	4.8	16.7	11.1	70
number1868	Male	64	75.4	178.5	23.6644	3.78	6.66	151	240	41.8	12.67	22.4	21.5	86
number1869	Male	59	82	166.5	29.5791	3.96	7.23	163	167	45.1	4.77	19.6	28.5	85
number1870	Male	55	77.3	164.5	28.5659	3.48	5.95	144	209	46	3.8	17	18.4	63
number1871	Male	36	57.6	165	21.157	2.4	4.73	135	167	44.1	4.5	20.7	33.1	79
number1872	Female	59	45.2	150.5	19.9556	1.99	6.98	145	297	46.8	5.11	15.8	18.8	87
number1873	Female	44	61.3	165	22.5161	7.29	6.2	130	172	44.9	4.89	7.6	11.3	51
number1874	Female	47	62.5	157.5	25.1953	2.75	5.02	136	320	42.9	5.26	10	17.8	57
number1875	Female	46	50.7	155.5	20.9675	2.83	5.58	131	159	44.8	4.75	9.2	14.6	57
number1876	Male	51	65.9	169.5	22.9375	2.75	5.48	164	153	44.1	5.47	17	30.8	113
number1877	Male	52	75.6	166	27.435	4.12	6.23	151	193	43.6	4.75	18.4	19.8	80
number1878	Male	46	69.4	166.5	25.034	1.52	5.82	132	236	43	4.69	8.4	51.8	89
number1879	Male	51	87.6	172.5	29.4392	2.45	5.85	151	202	40.1	10.74	17.4	14	103
number1880	Male	81	63.2	164	23.4979	3.38	5.28	146	229	40.8	5.61	14.7	10.1	41
number1881	Male	33	69.7	168	24.6953	2.43	8.48	145	293	46.2	4.55	16.1	47.9	97
number1882	Female	56	65.5	161.5	25.1129	2.06	7.35	135	215	45.6	4.88	12.6	36.7	68
number1883	Male	39	69.5	170.5	23.9076	2.37	4.74	162	244	46.7	4.34	19.2	30.9	58
number1884	Male	46	71.4	163.5	26.7093	2.56	6.44	160	165	46.3	4.36	12.2	83.2	98
number1885	Male	67	63.9	167	22.9123	2.34	6.38	138	164	38.5	5.57	19.5	17.3	51
number1886	Female	68	62.9	160.5	24.4175	3.7	6.41	125	126	42.7	5.59	10.2	11.5	70
number1887	Female	42	63.8	157.5	25.7193	2.15	6.55	116	309	43.3	5	10.6	15.4	95
